# Supplementary material for: The evolution of a stereoselective synthesis of the C1–C16 fragment of bryostatins
Source: Royal Society of Chemistry journal article supplement (doi:10.1039/c6ob01804a), 2016-01-01

## **The evolution of a stereoselective synthesis of the C1-C16 fragment of bryostatins**

Matthew Ball, Anne Baron, Ben Bradshaw, Raphaël Dumeunier, Matthew O'Brien, Hiroki Omori and Eric J. Thomas

### **Supplementary data**

Copies of  $^1\text{H}$  and  $^{13}\text{C}$  NMR spectra of some key compounds – in numerical order

4b-238  
STANDARD 18 OBSERVE

Solvent: CCl4  
Ambient temperature  
Sample #4  
File: 401  
Queue name: Pub14b  
DATE: Feb 14 02  
INSTR: 300 "echo"  
PULSE PROGRAM:   
Relax. delay: 3.100 sec  
Pulse: 90.0 degrees  
Acq. time: 3.641 sec  
Width: 4499.9 Hz  
16 repetitions  
OBSERVE: H1, 299.8459088 MHz  
DATA PROGRAM:   
Line broadening: 0.3 Hz  
FT size: 65536  
Total time: 1 minutes

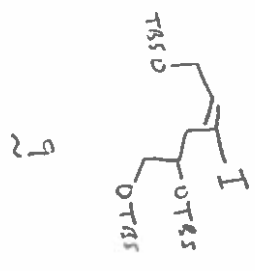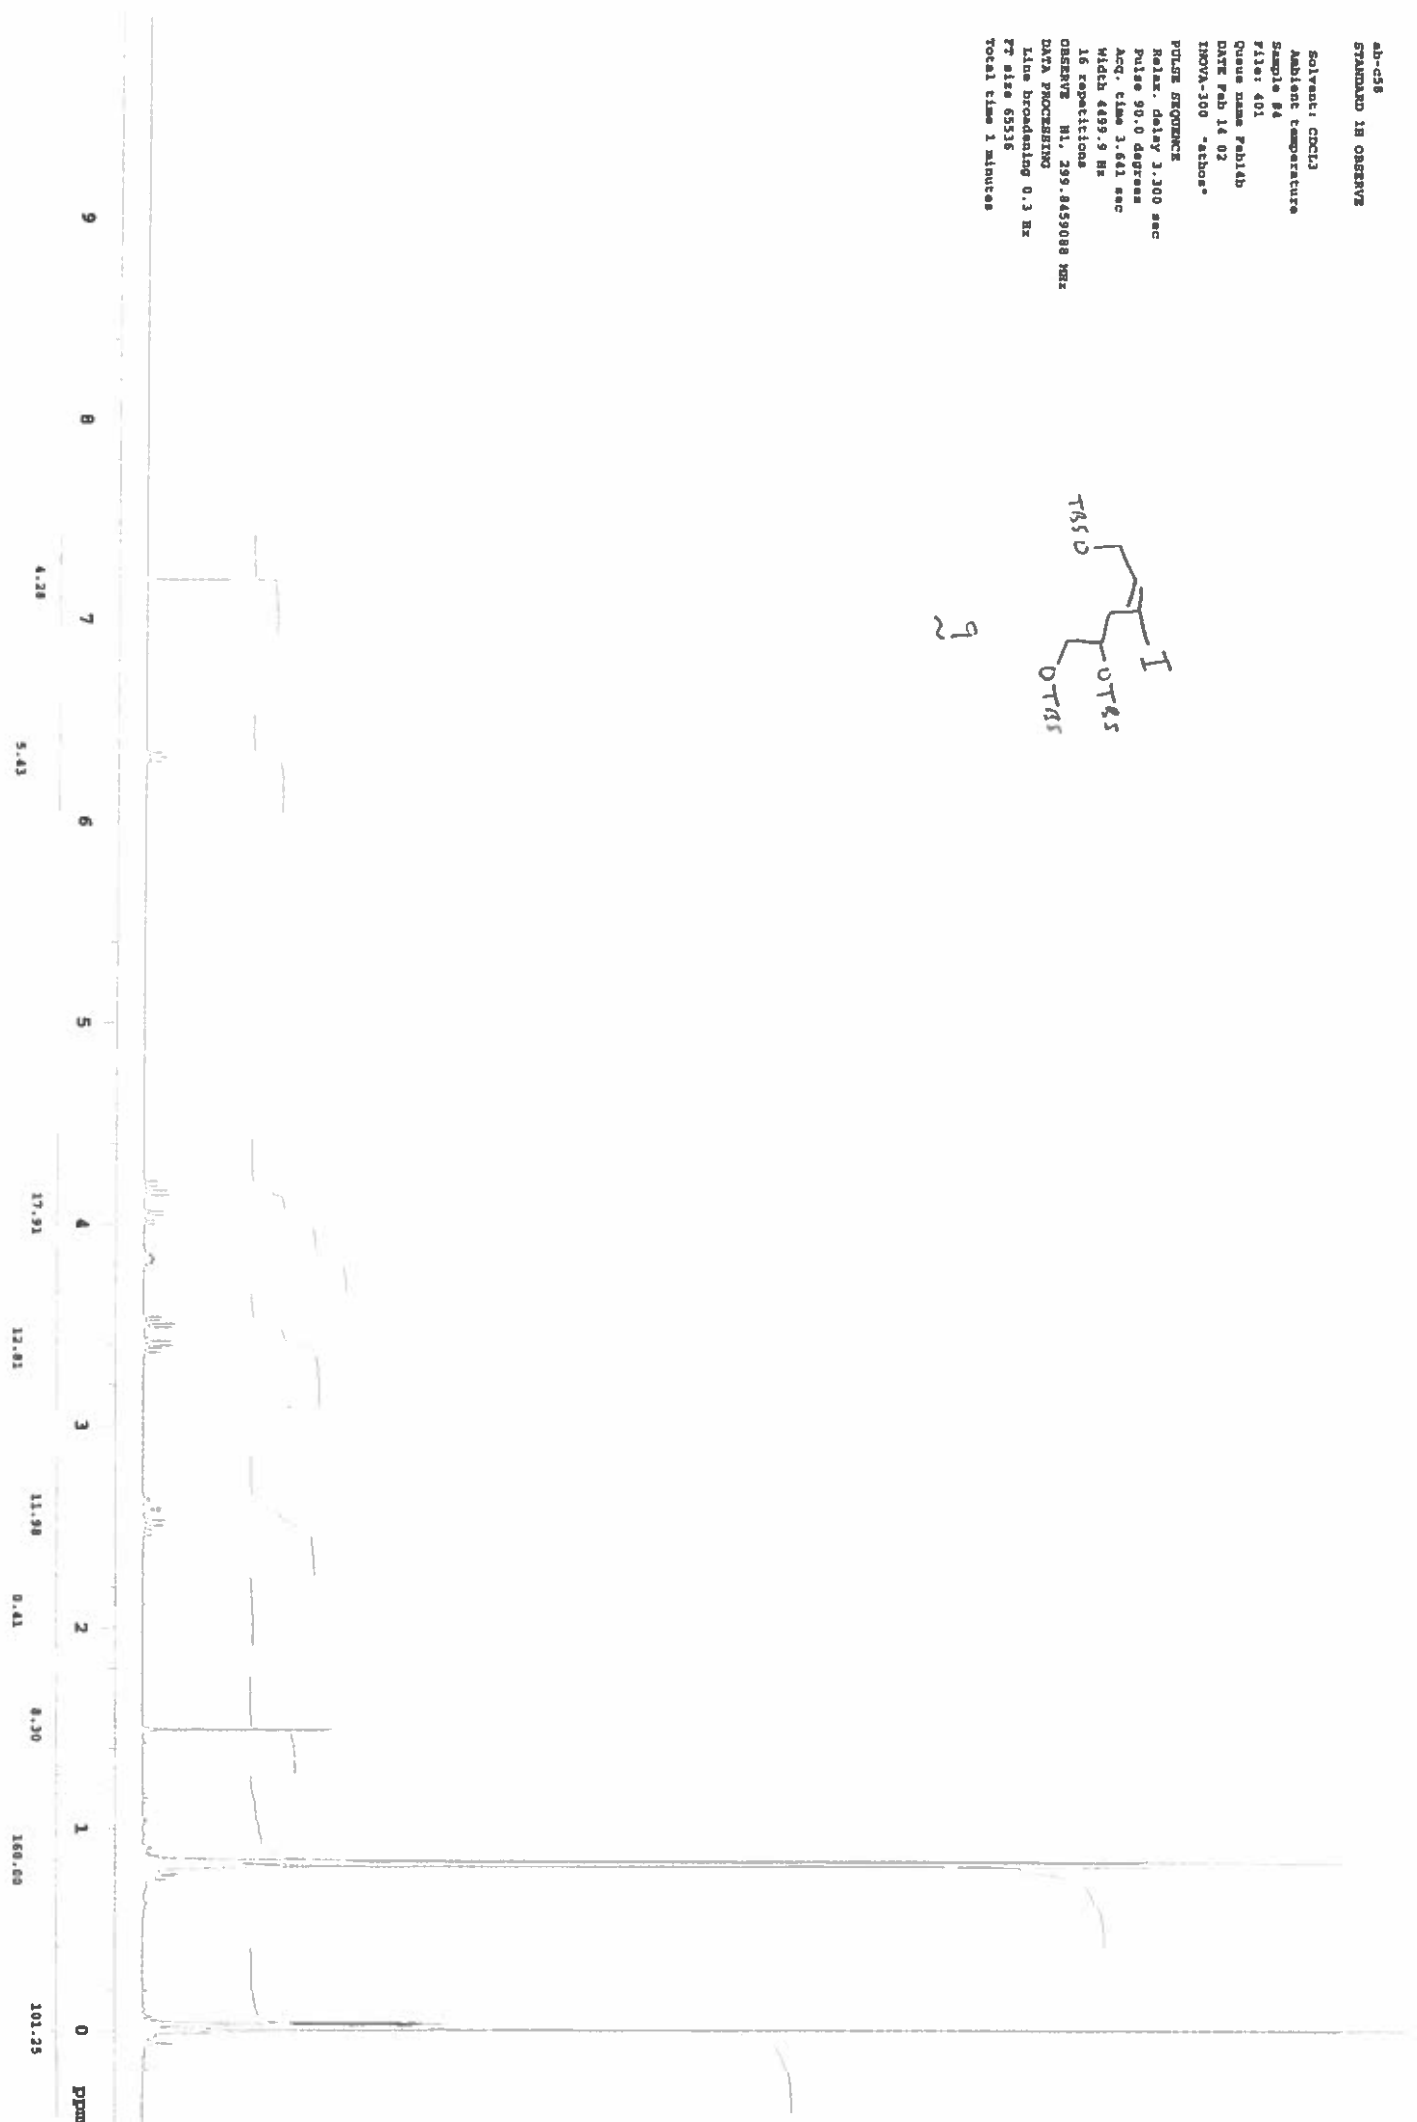

AS-C14  
STANDARD IR OBSERVE

Solvent: CDCl3  
Ambient temperature  
Sample 833  
File: 1102  
Queue name Nov27b  
Date Nov 27 01  
INOVA-300 "q3b00"  
PULSE SEQUENCE  
Pulse 45.0 degrees  
Acq. time 1.618 sec  
Width 20000.0 Hz  
16 repetitions  
OBSERVE C13, 75.3963141 MHz  
DECUPLE H1, 299.8473785 MHz  
Power 40 dB  
continuously on  
WALTZ-16 modulated  
DATA PROCESSING  
Line broadening 1.0 Hz  
Ft size 65536  
Total time 1 minute

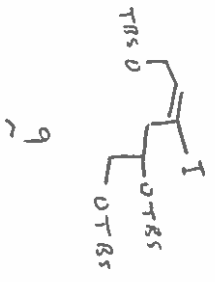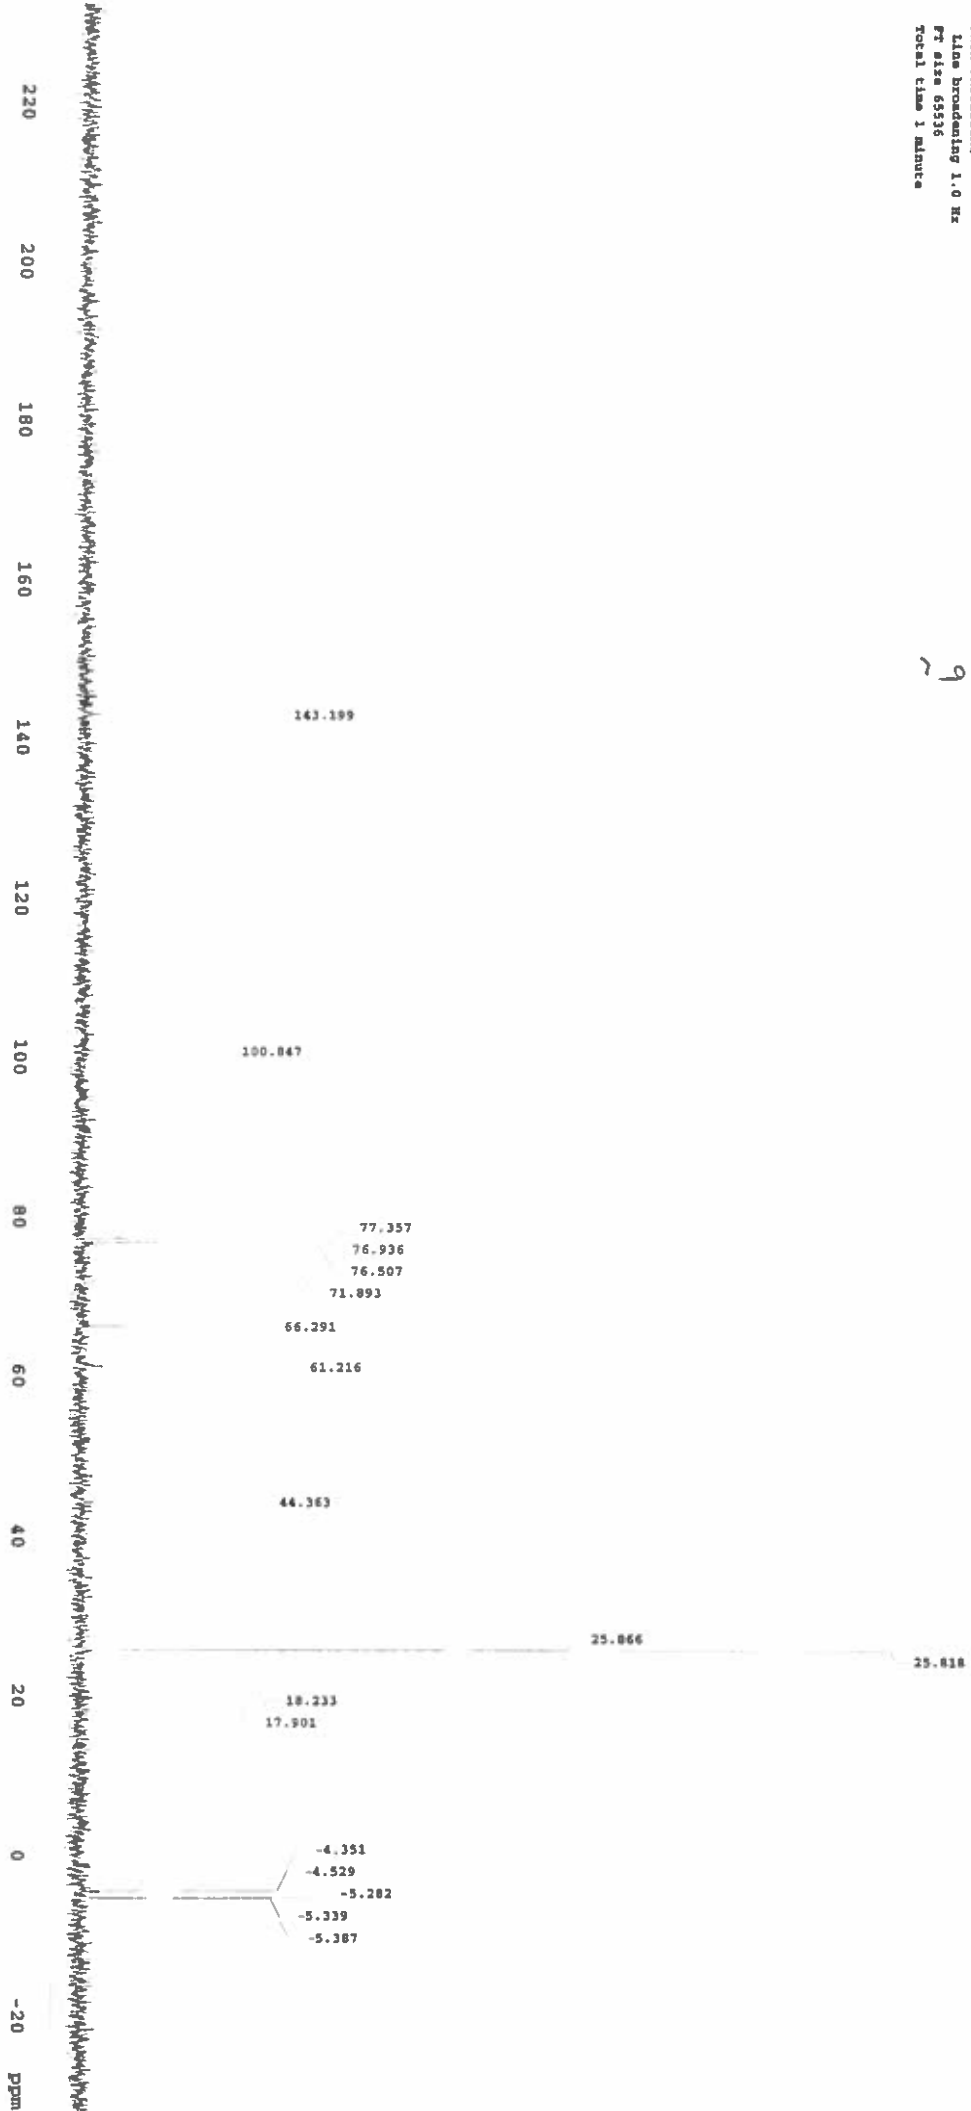

AB-899  
STANDARD IR OBSERVE

Solvent: CCl<sub>4</sub>  
Ambient temperature  
Sample #5  
File: 501  
Queue name Nov07b  
DATE Nov 7 01  
INOVA-300 "athos"  
PULSE SEQUENCE  
Relax. delay 3.100 sec  
Pulse 90.0 degrees  
Acq. time 3.641 sec  
Width 489.9 Hz  
16 repetitions  
OBSERVE H1, 299.8439007 MHz  
DATA PROCESSING  
Line broadening 0.3 Hz  
FT size 65536  
Total time 1 minutes

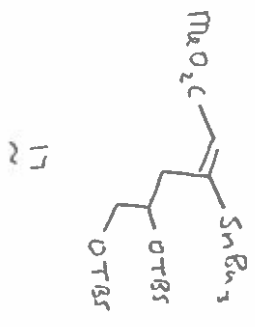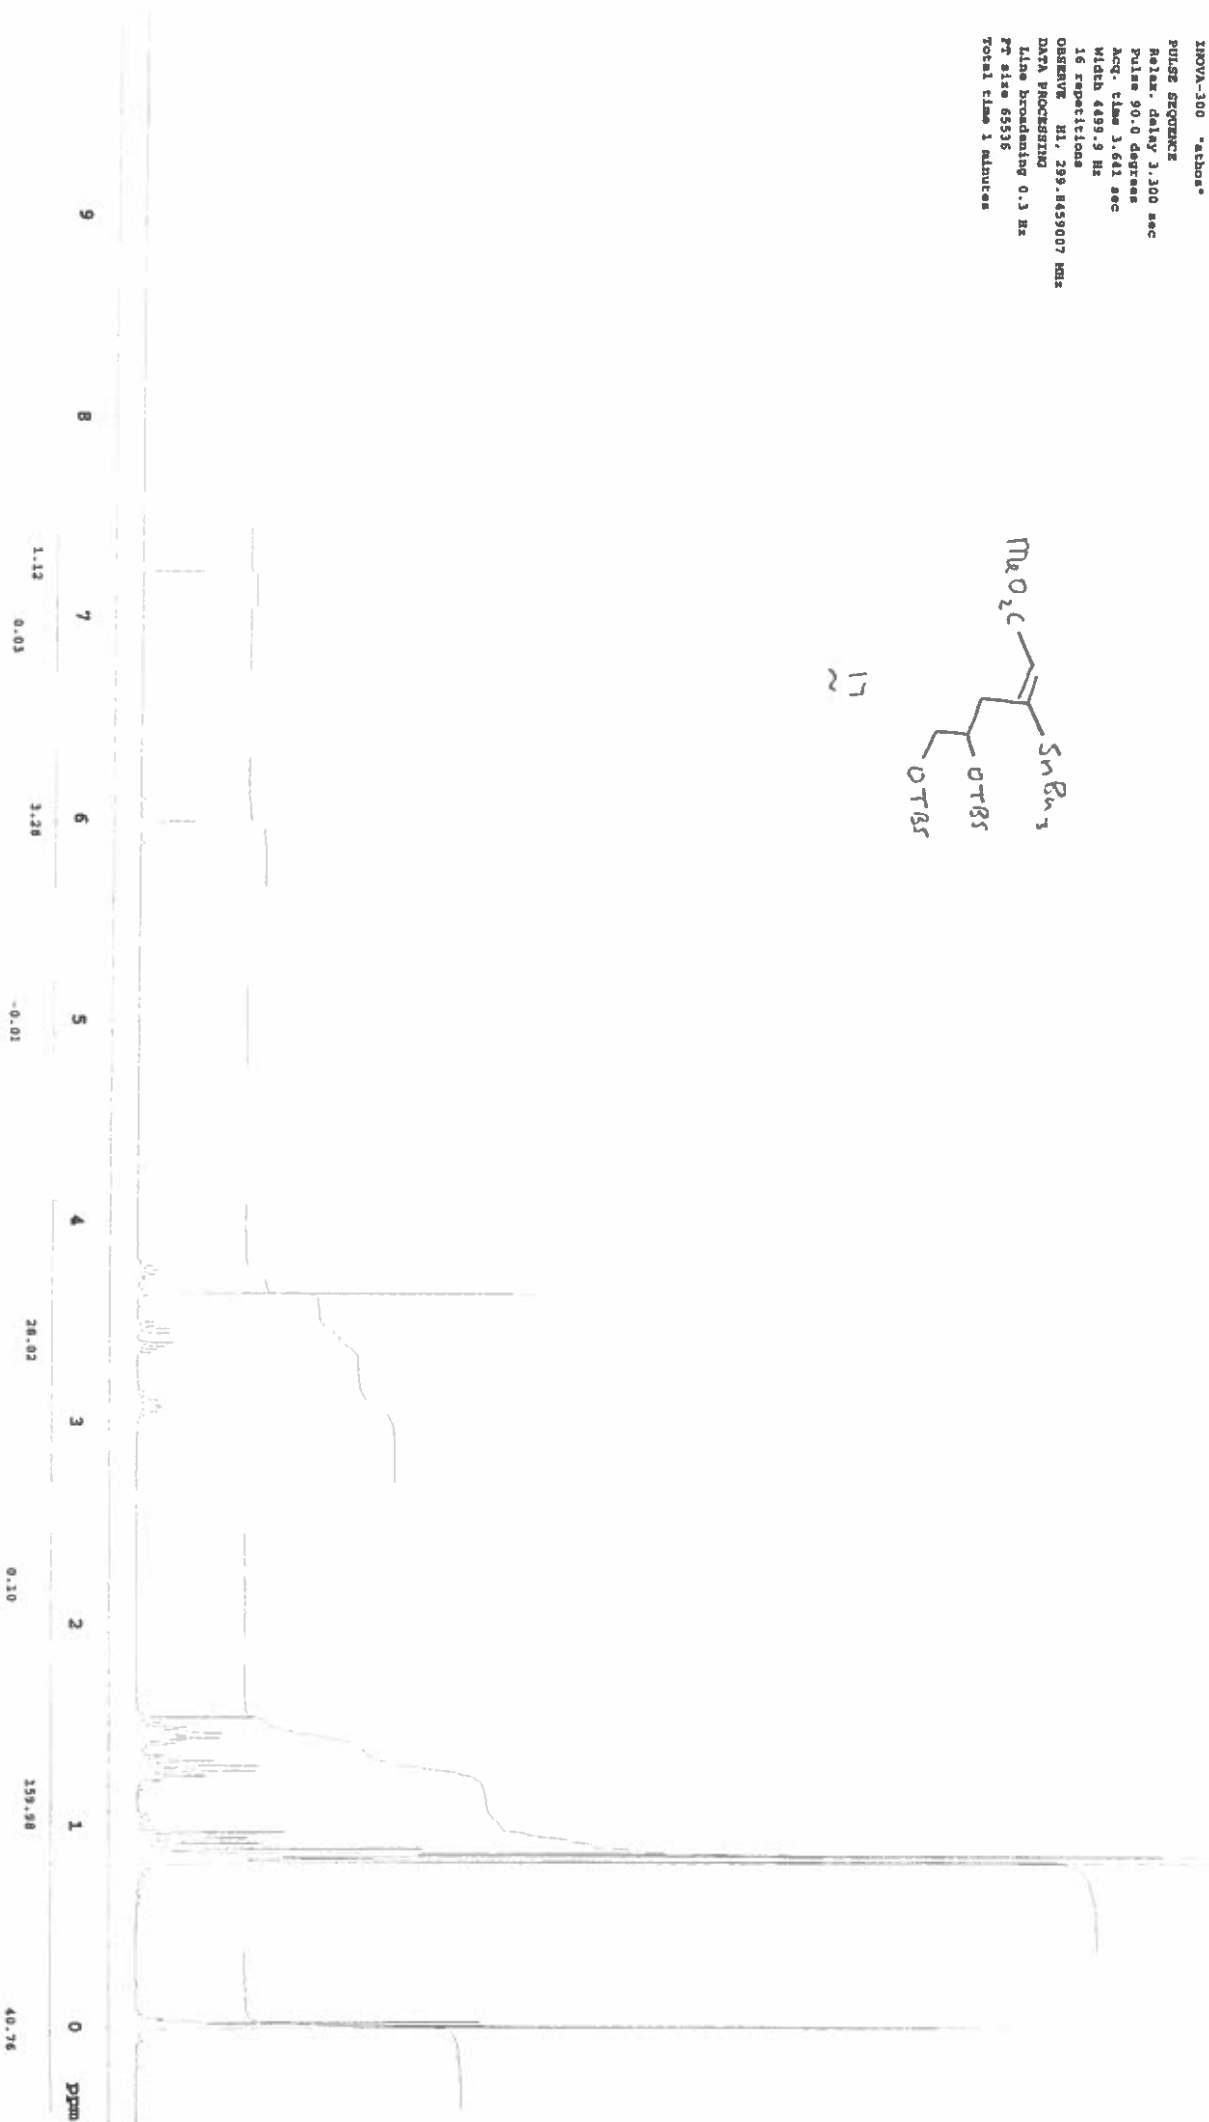

AS-899  
13C OBSERVE

Solvent: CDCl3  
Ambient temperature  
Sample #32  
File: 3201  
Queue name Nov07b  
Date Nov 8 01  
INOVA-100 "atmos"  
PULSE SEQUENCE  
Pulse 45.0 degrees  
Acq. time 1.638 sec  
Width 20000.0 Hz  
1024 repetitions  
OBSERVE C13, 75.396141 MHz  
DECUPLE H1, 299.847385 MHz  
Power 4.0 dB  
continuously on  
WALTZ-16 modulated  
DATA PROCESSING  
Line broadening 1.0 Hz  
FT size 65536  
Total time 27 minutes

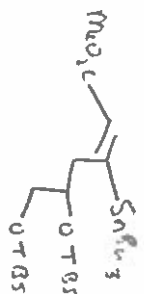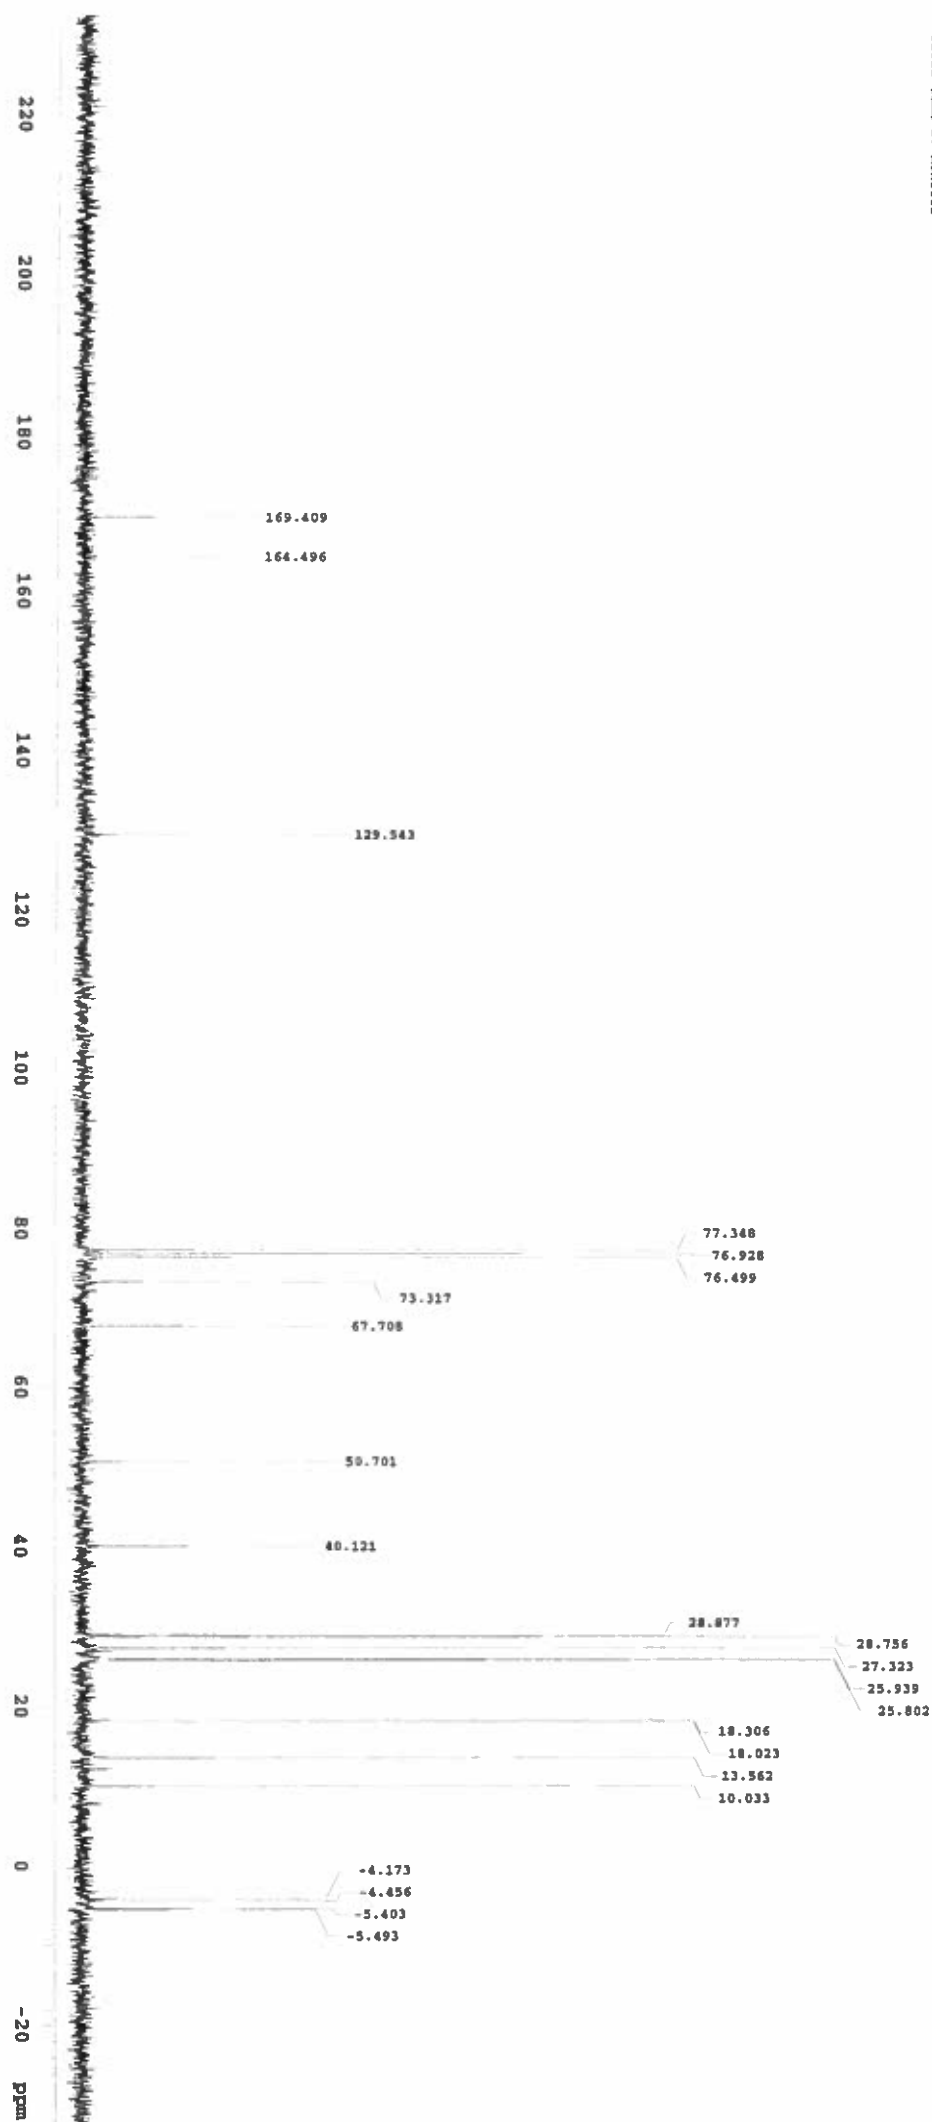

A Satou  
AB-C66  
cdcl3  
Inova (400MHz)  
Armalis  
Proton 400MHz  
04.01.02  
434

Pulse Sequence: zgpg30  
Solvent: cdcl3  
Ambient temperature  
User: 1-12-87  
File: 434-04-03-AB-RS  
INOVA-400 "Armalis"

Relax. delay 5.000 sec  
Pulse 16.0 degrees  
Acq. time 4.009 sec  
Width 1397.6 Hz  
16 repetitions  
OBSERVED RI, 199.9584169 MHz  
DATA PROCESSING  
Line broadening 0.3 Hz  
FT size 65536  
Total time 2 min, 24 sec

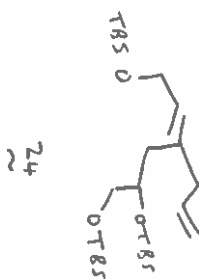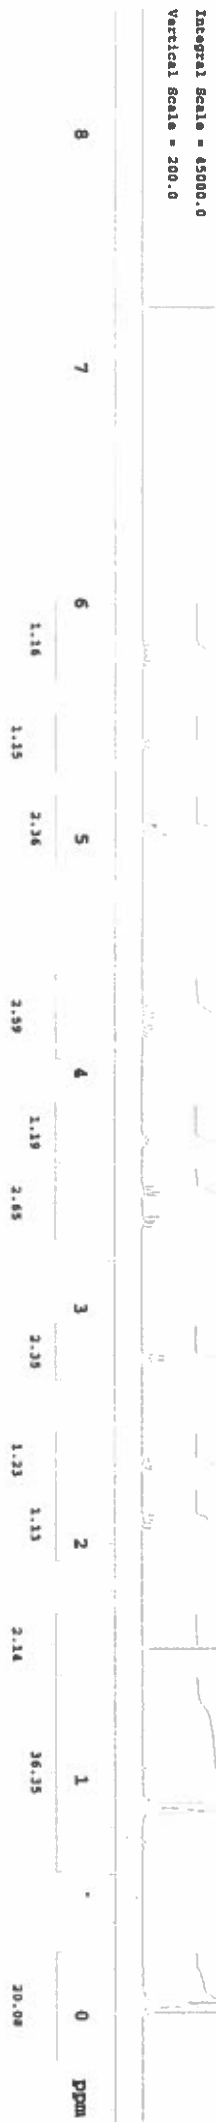

ab-cl8  
11C OBSERVE

Solvent: CDCl3  
Ambient temperature

Sample 85

File: 501

Queue name Dec05a

DATE Dec 5 01

INSTRUM-300 "athos"

PULSE SEQUENCE

Pulse 45.0 degrees

Acq. time 1.638 sec

Width 20000.0 Hz

256 repetitions

OBSERVE C13, 75.3963141 MHz

DECOUPLE H1, 299.8473785 MHz

Power 40 dB

continuously on

WALTZ-16 modulated

DATA PROCESSING

Line broadening 1.0 Hz

FT size 65536

Total time 7 minutes

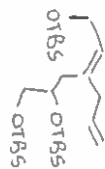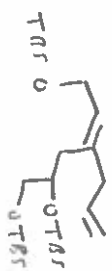

24

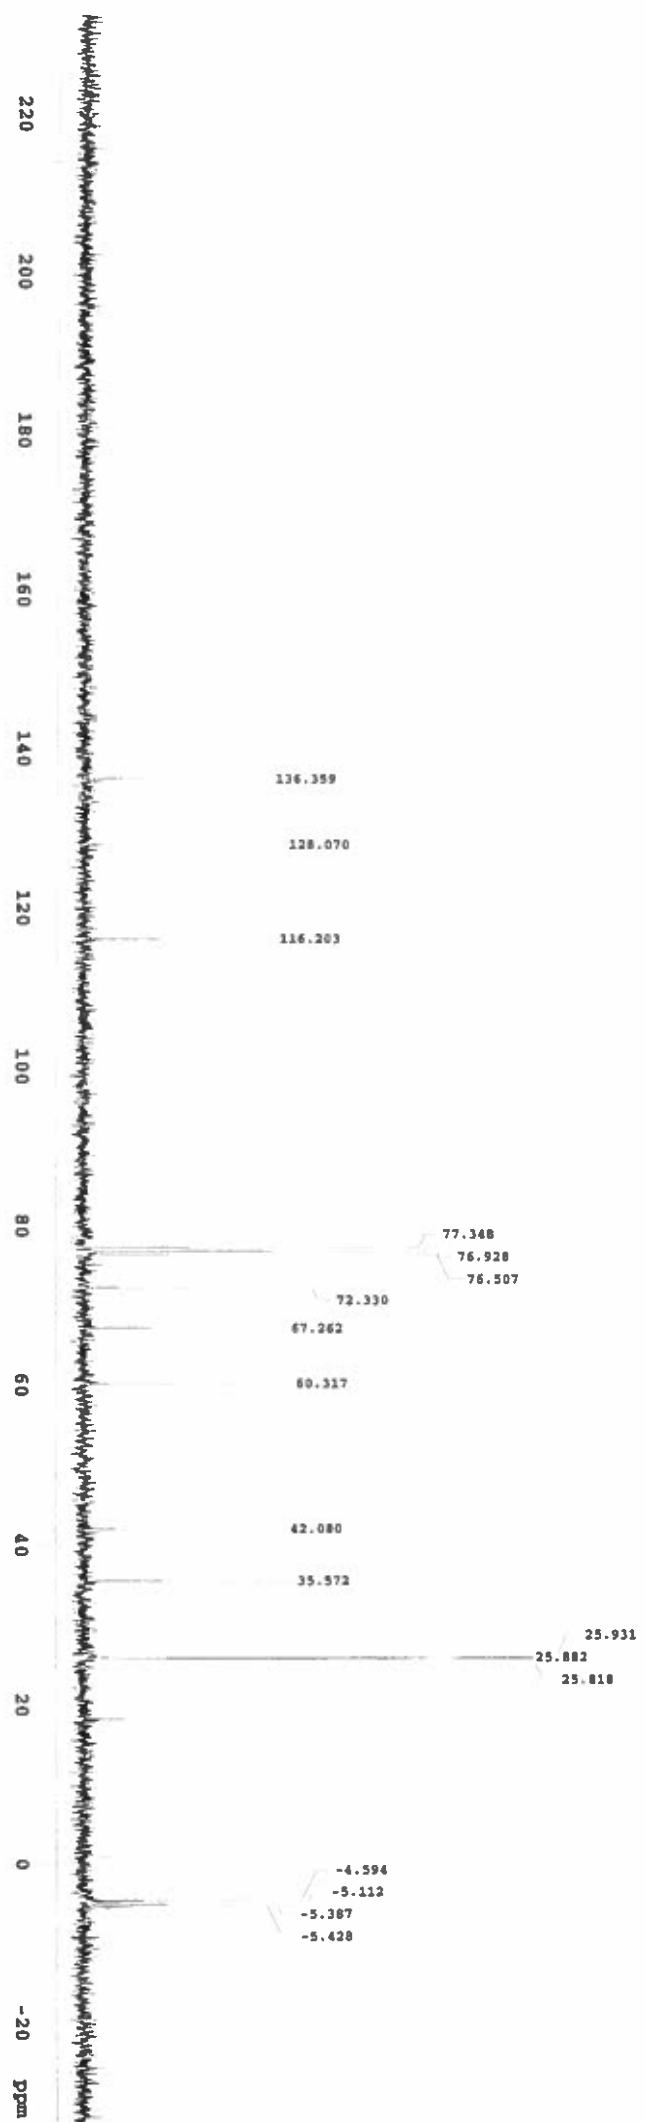

ab-0251  
STANDARD 18 OBSERVE

Automation directory: /data/sep10  
File: 3701

Pulse Sequence: s2pul  
Solvent: cdcl3  
Ambient temperature  
Sample #37  
File: 3701  
INSTR: 300 "zracy"

Relax. delay 1.000 sec  
Pulse 45.0 degrees  
Acq. time 3.746 sec  
Width 4797.6 Hz  
16 repetitions  
OBSERVE: H1, 299.8458793 MHz  
FT: also 65536  
Total time 1 min, 16 sec

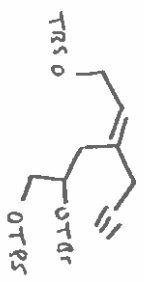

27

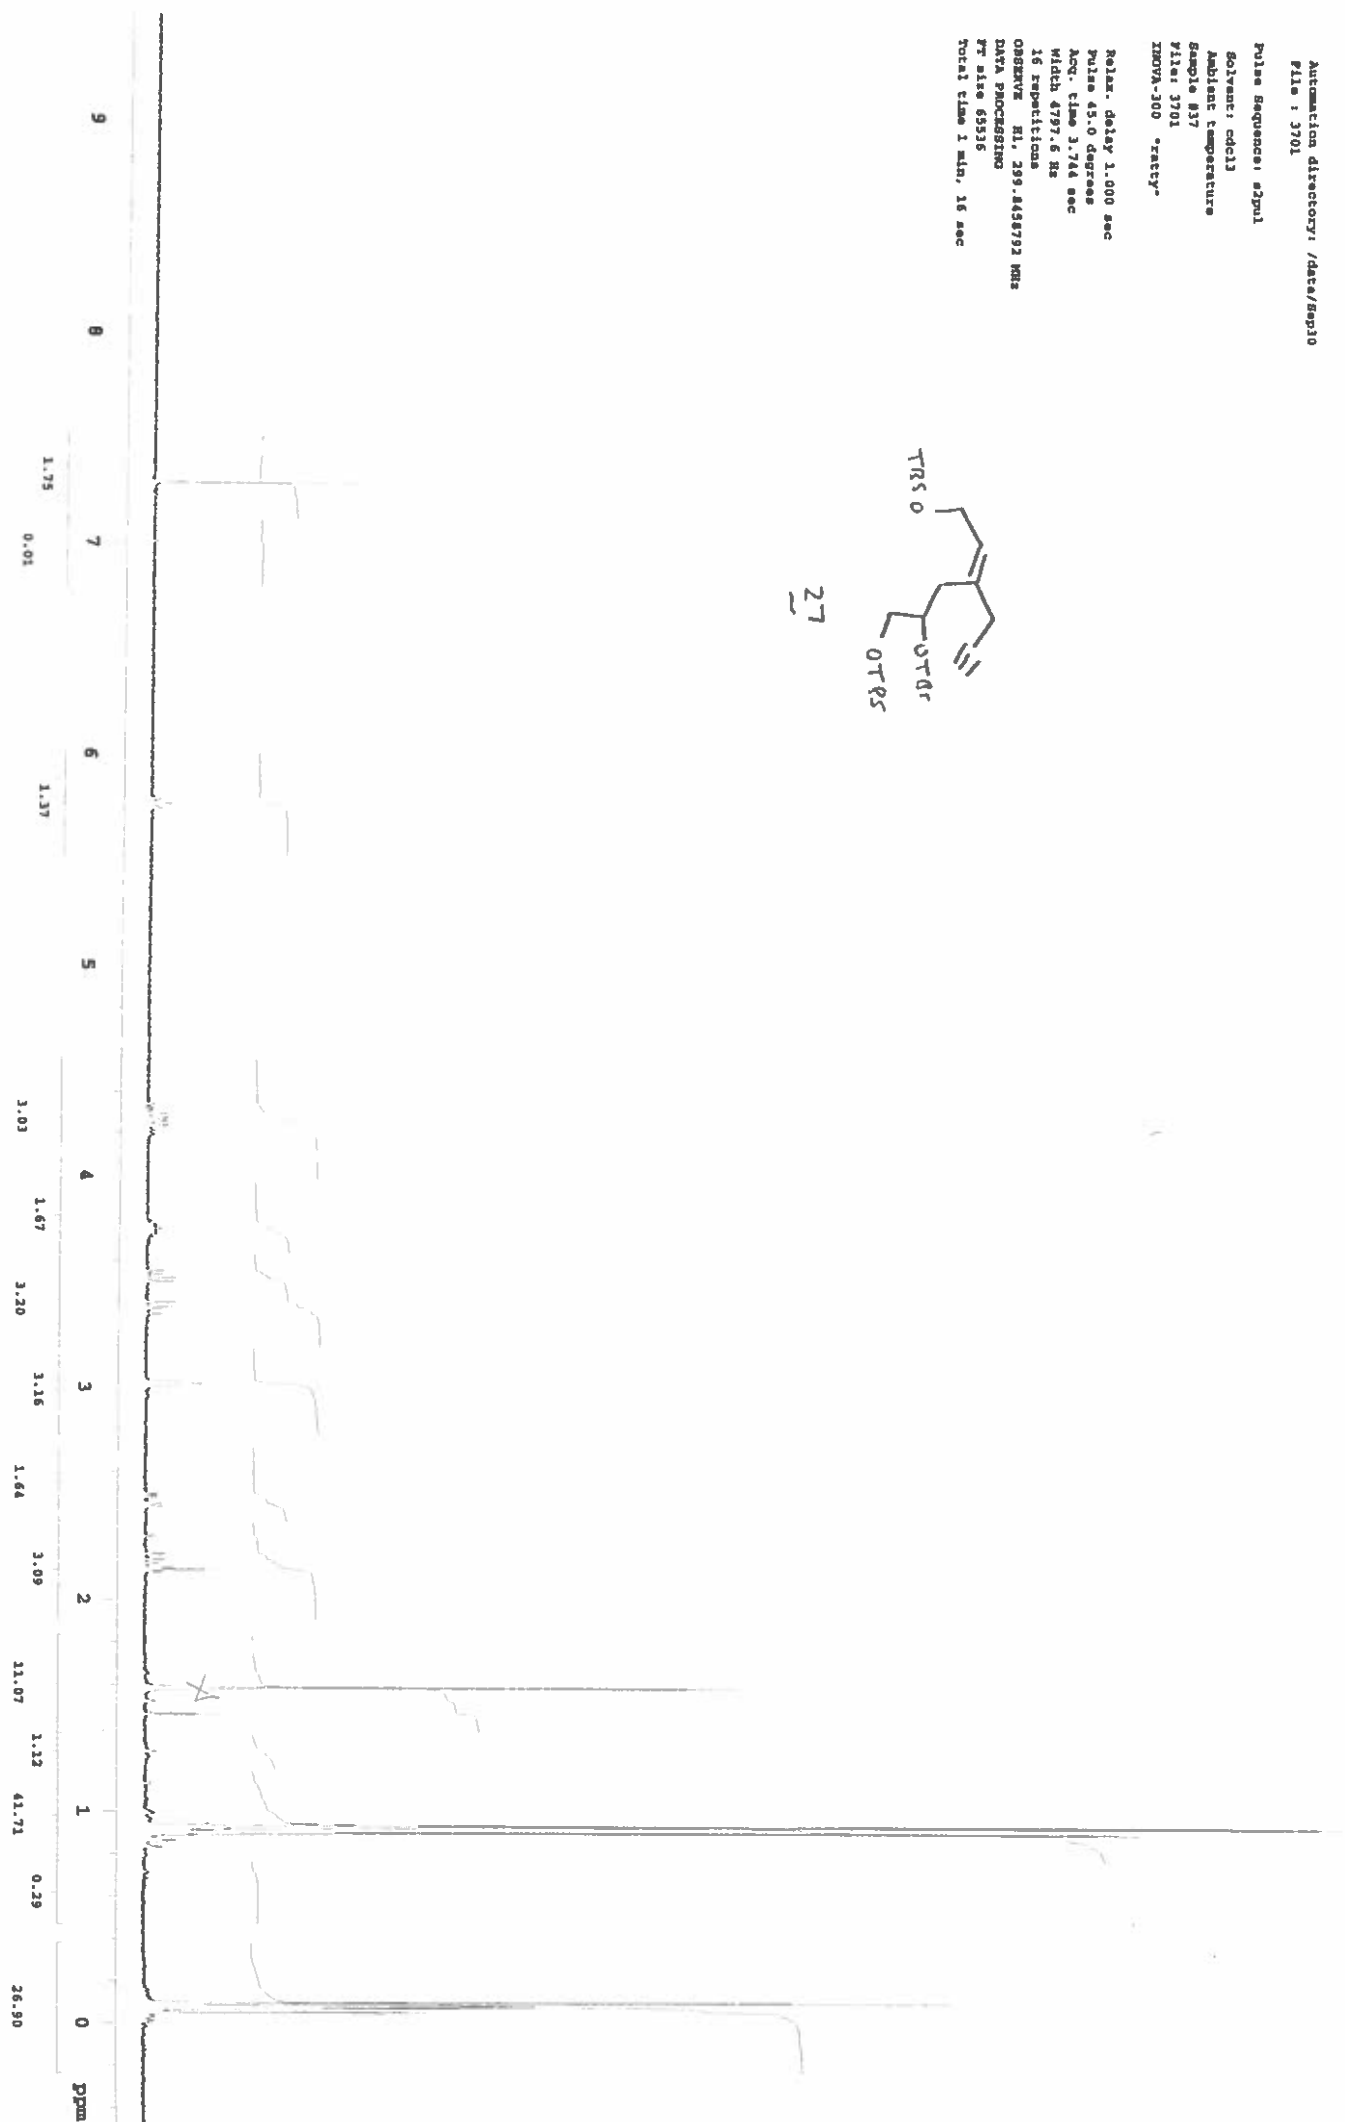



ab-c86  
11c OBSERVE

Solvent: CDCl3  
Ambient temperature  
Sample #15  
Pile: 2501  
Queue name: HAZ22b  
DATE: Mar 27 02  
INOVA-300 \*athos-

PULSE SEQUENCE  
Pulse 45.0 degrees  
Acq. time 1.618 sec  
Width 20000.0 Hz  
1024 repetitions  
OBSERVE CH1, 75.3963141 MHz  
DECOUPLE H1, 299.843785 MHz  
Power 40 dB  
continuously on  
NMRZ-16 modulated  
DATA PROCESSING  
Line broadening 1.0 Hz  
Ft size 65536  
Total time 27 minutes

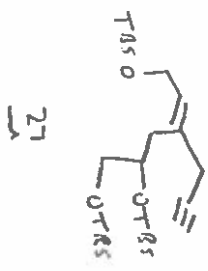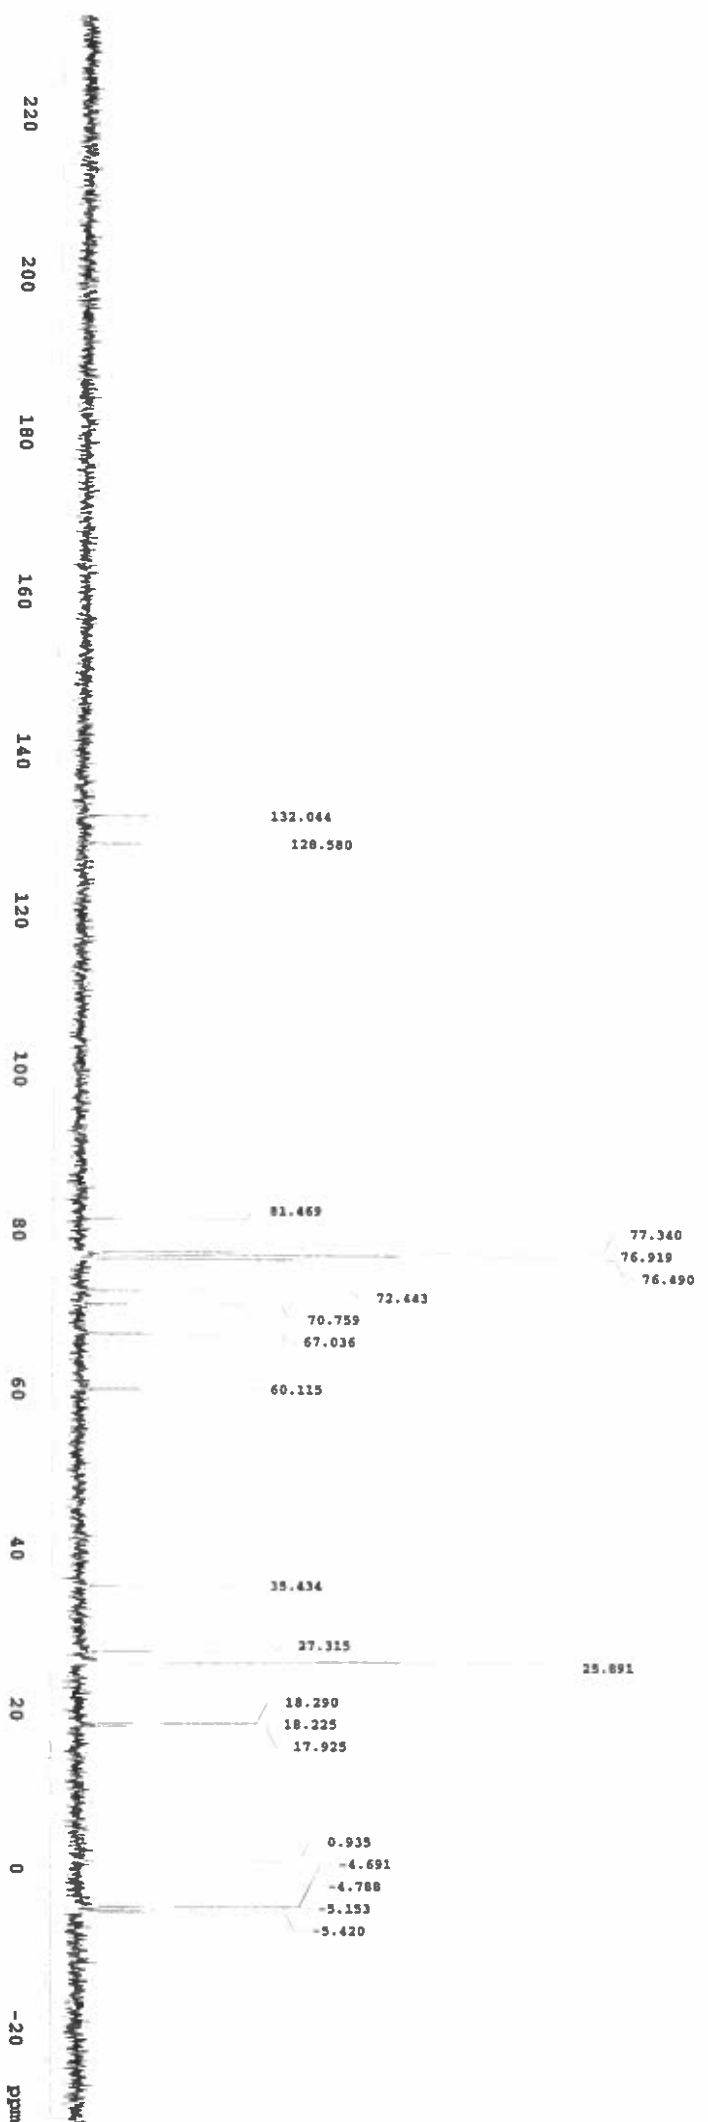

ab-d8  
STANDARD IS OBSERVE

Solvent: CDCl3  
Ambient temperature  
Sample #14  
Vial: 1401  
Queue name Apr10b  
DATE Apr 10 02  
INOVA-100 "athos"

PTERIS STRUCTURE  
Relax. delay 3.100 sec  
Pulse 90.0 degrees  
Acq. time 3.681 sec  
Width 6699.9 Hz  
16 repetitions  
OBSERVE H1, 299.8458793 MHz  
DATA PROCESSING  
Line broadening 0.3 Hz  
PT size 65536  
Total time 1 minutes

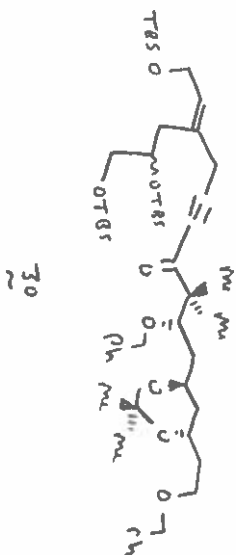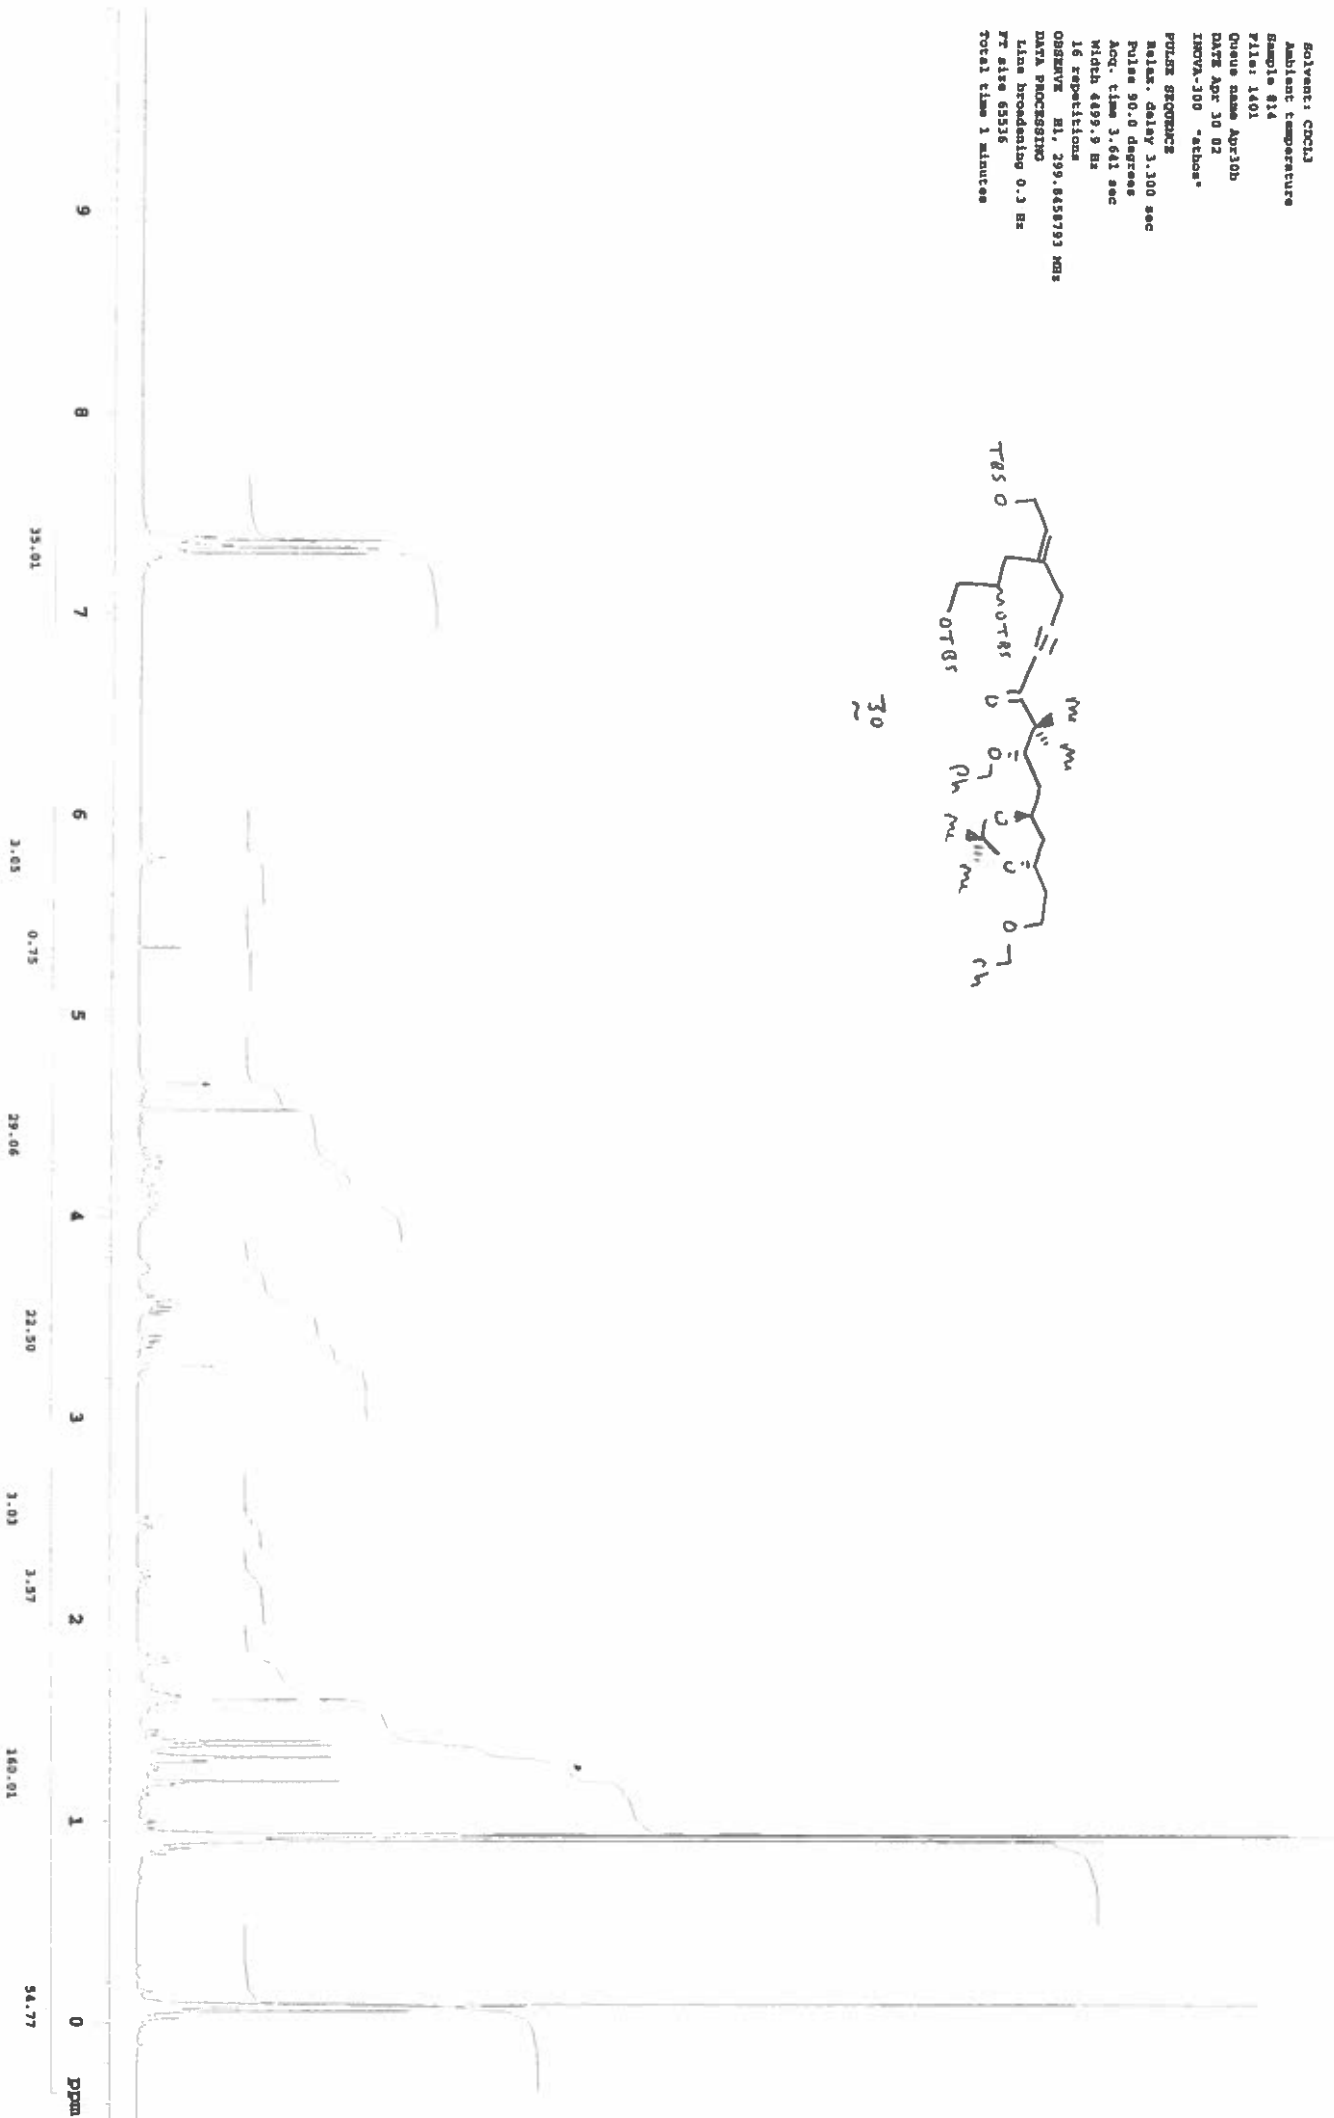

Anne Baran  
 AB-Dg  
 cdcl3  
 Inova 400(05)  
 Aramala  
 13C 100MHz  
 03.05.02  
 578C

Pulse Sequence: zgpg30  
 Solvent: cdcl3  
 Ambient temperature  
 File: 578c-03-05-AB-DG  
 INOVA-400 "aramala"

Pulse 36.0 degrees  
 Acq. time 1.311 sec  
 Width 25000.0 Hz  
 16896 repetitions  
 OBSERVE C13, 100.566308 MHz  
 DECOUPLE H1, 399.959751 MHz  
 Power 18 dB  
 continuously on  
 NMRZ-16 modulated  
 DATA PROCESSING  
 Line broadening 1.0 Hz  
 FT size 6536  
 Total time 366542 hr., 47 min., 28 sec

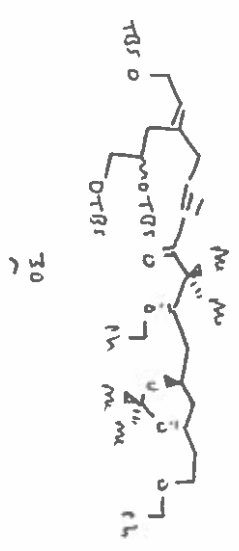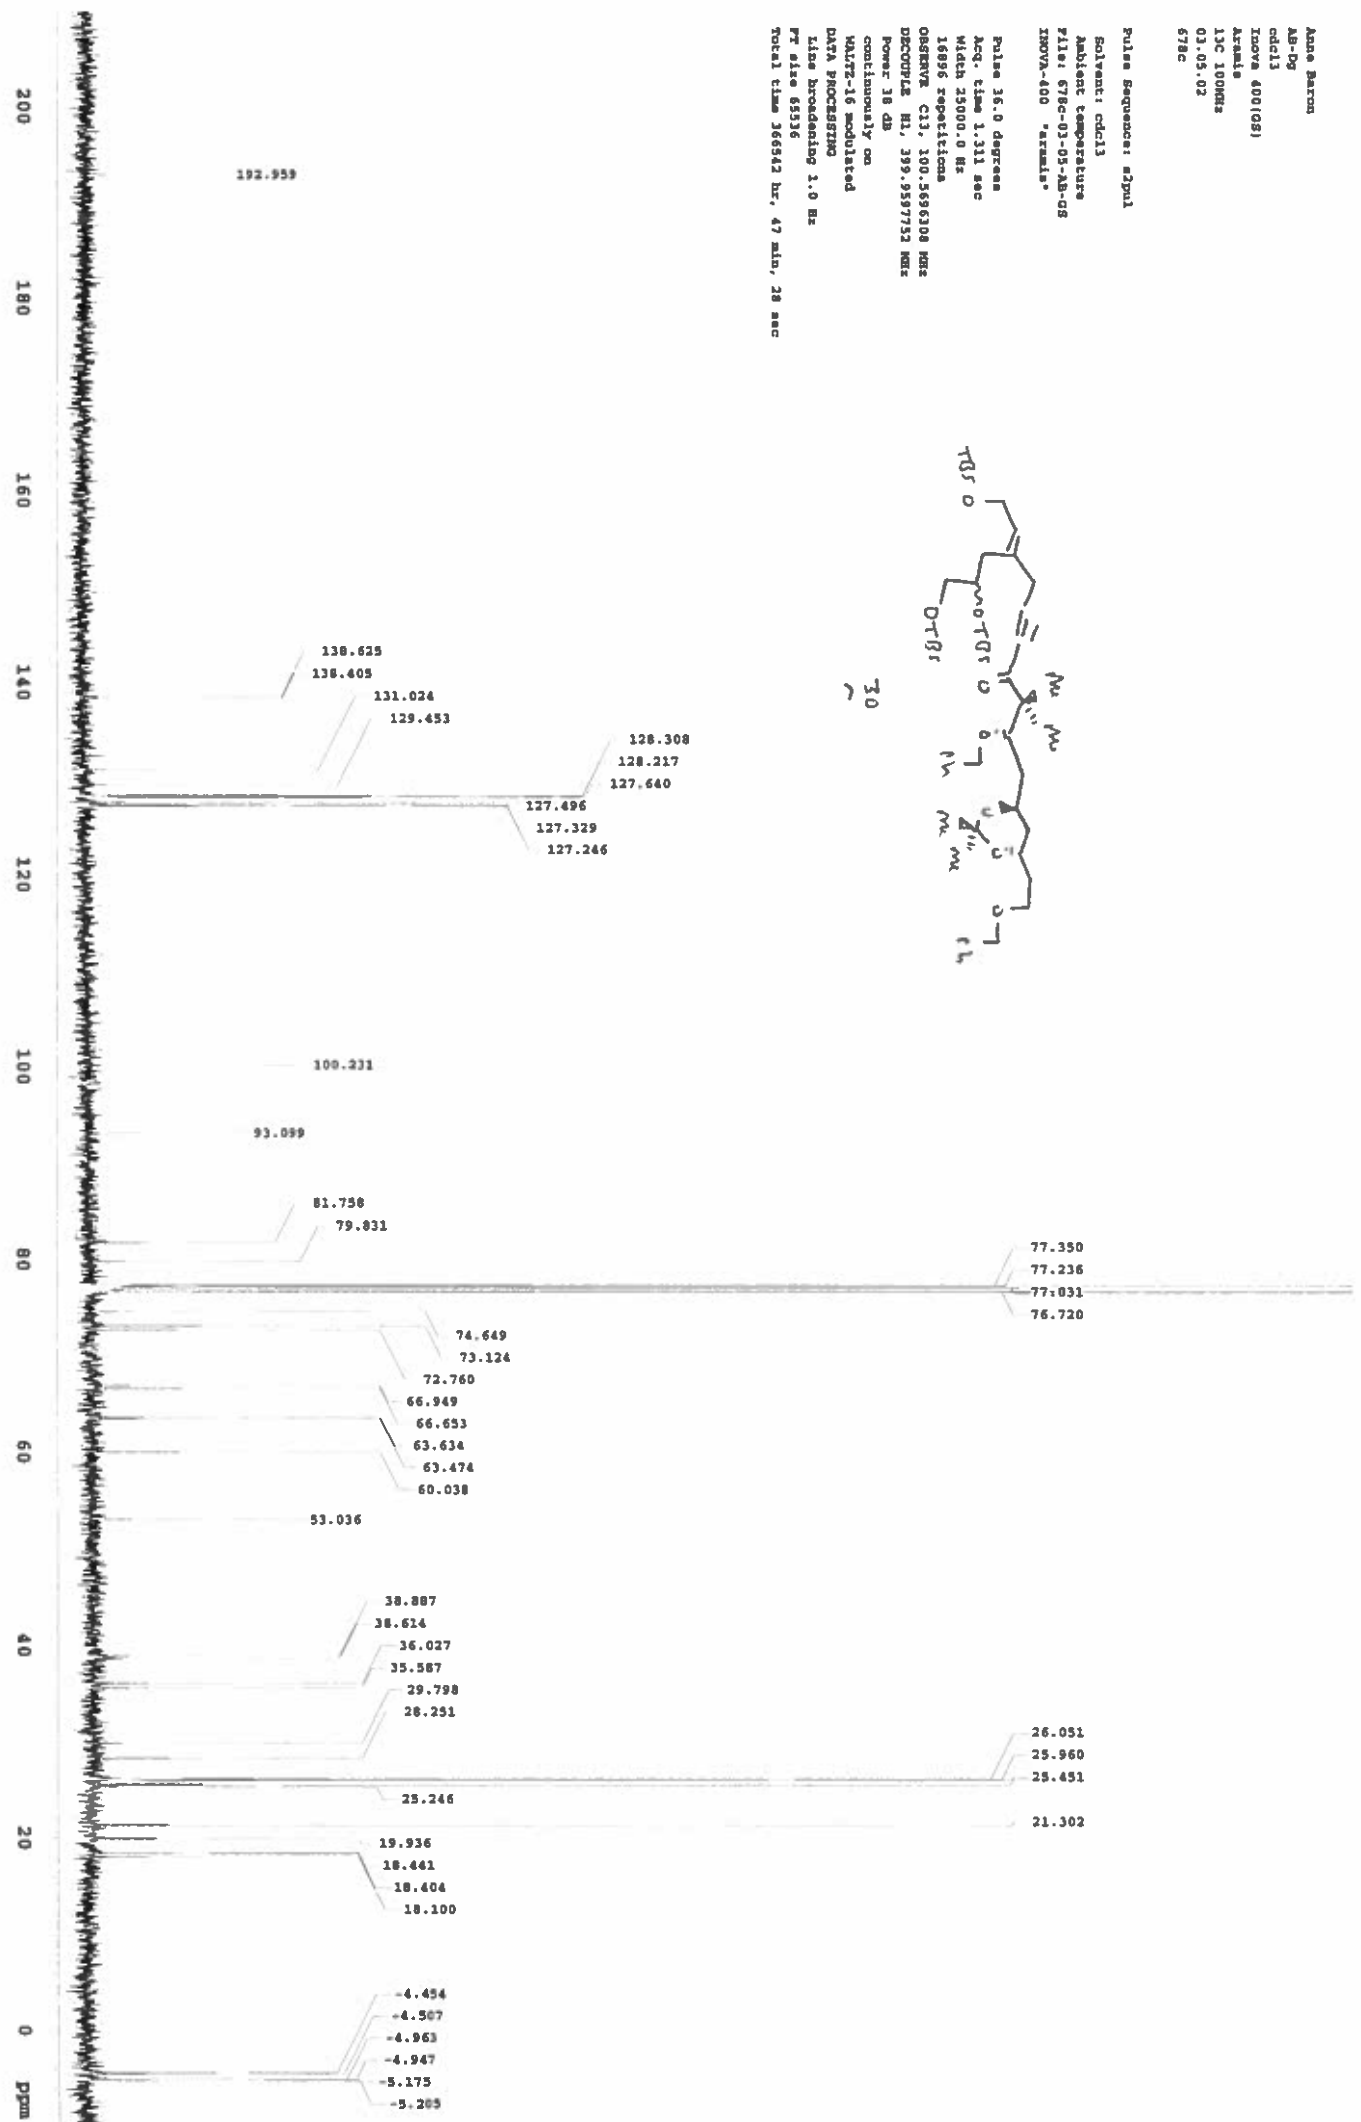

matchew 0'Brien mobi/051  
STANDARD IR OBSERVE

Solvent: CDCl3  
Ambient temperature  
Sample 830  
File: 1001  
Queue name Feb11b  
Date Feb 12 99  
INOVA-300 "echo"  
PULSE SEQUENCE  
Relax: delay 3.100 sec  
Pulse 90.0 degrees  
Acq. time 3.641 sec  
Width 4639.9 Hz  
16 repetitions  
OBSERVE H1, 299.0458661 MHz  
DATA PROCESSING  
Line broadening 0.3 Hz  
FT size 65536  
Total time 1 minutes

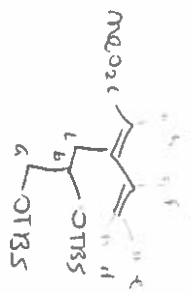

34

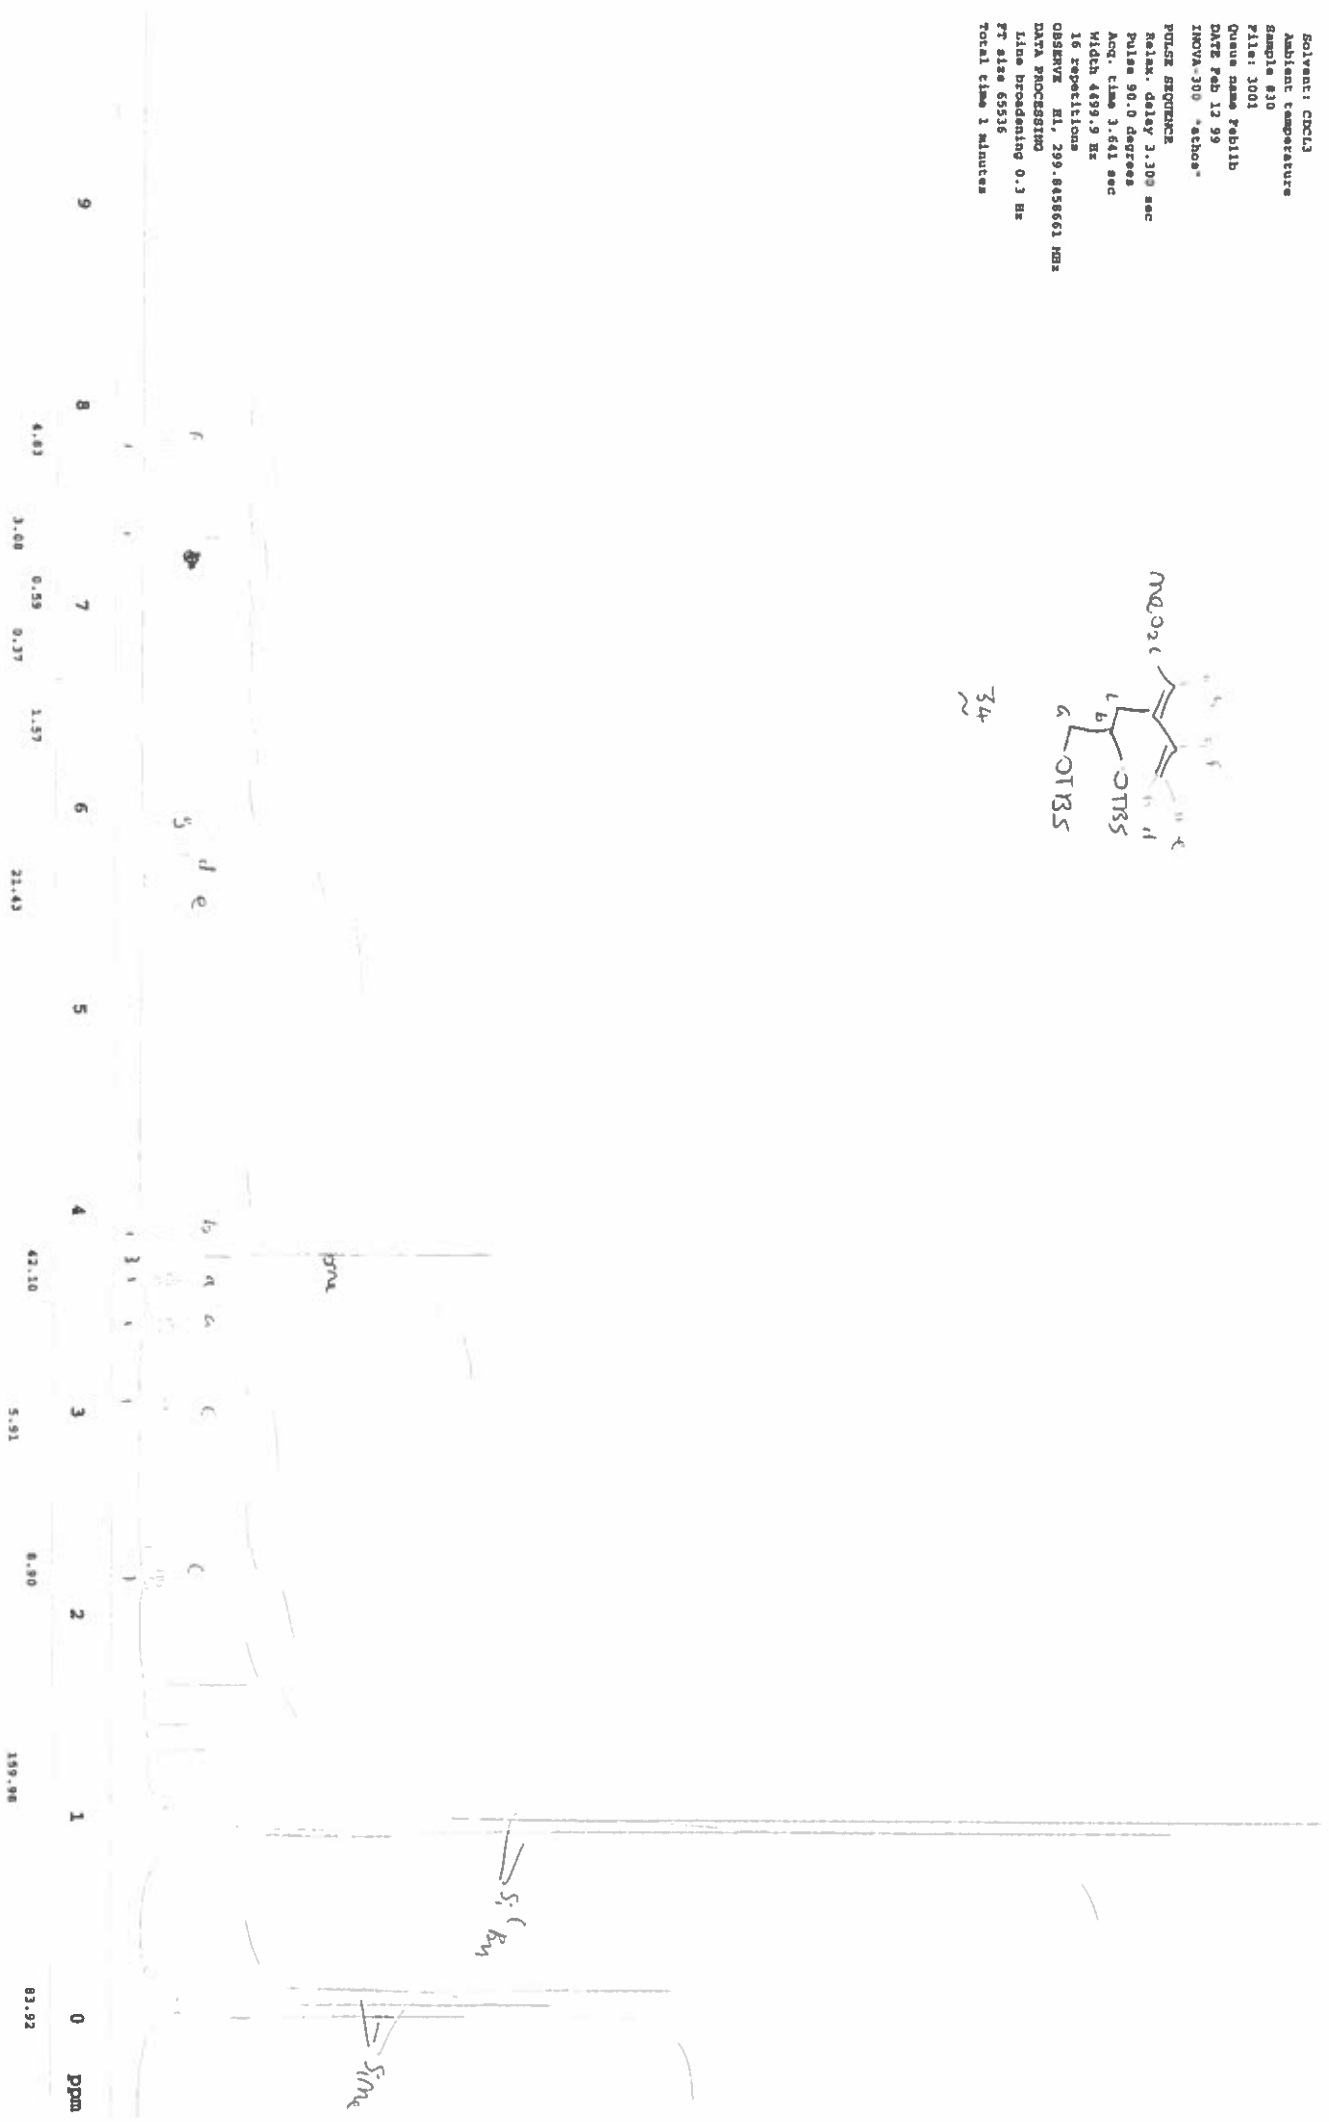

matchw o/brian mob/vi  
13C OBSERVE

Solvent: CDCl3  
Ambient temperature  
Sample #15  
File: 1501  
Queue name Aug27a  
DATE Aug 27 99  
INSTR-100 \*ethos\*  
PULSE SEQUENCE  
Pulse 45.0 degree  
Acq. time 1.638 sec  
Width 20000.0 Hz  
128 repetitions  
OBSERVE C13, 75.366141 MHz  
DECOUPLE H1, 299.8473785 MHz  
Power 40 dB  
continuously on  
WALTZ-16 modulated  
DATA PROCESSING  
Line broadening 1.0 Hz  
FT size 65536  
Total time 3 minutes

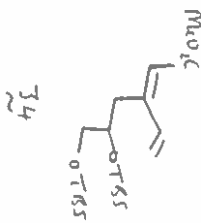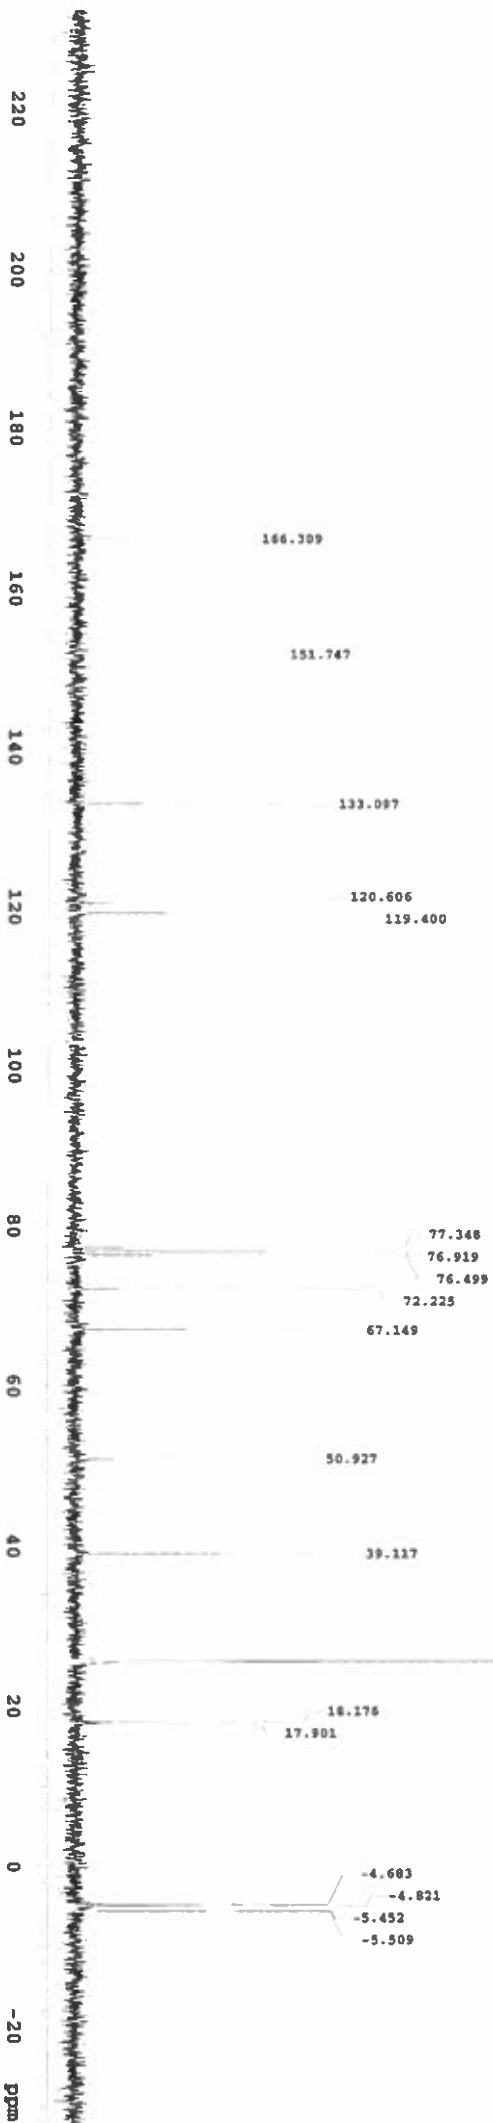

Matthew O'Brien mob1/0917/w  
STANDARD IN OBSERVE

Solvent: CDCl3  
Ambient temperature  
Sample 849  
File: 4901  
Queue name Apr27b  
DATE Apr 27 99  
INOVA-100 \*echo\*  
PULSE SEQUENCE  
Relax. delay 3.300 sec  
Pulse 90.0 degree  
Acq. time 1.641 sec  
Width 4499.9 Hz  
16 repetitions  
OBSERVE H1, 299.8459136 MHz  
DATA PROCESSING  
Line broadening 0.3 Hz  
PT size 65536  
Total time 1 minutes

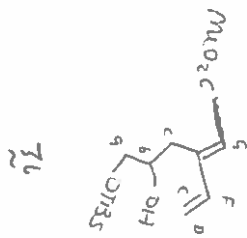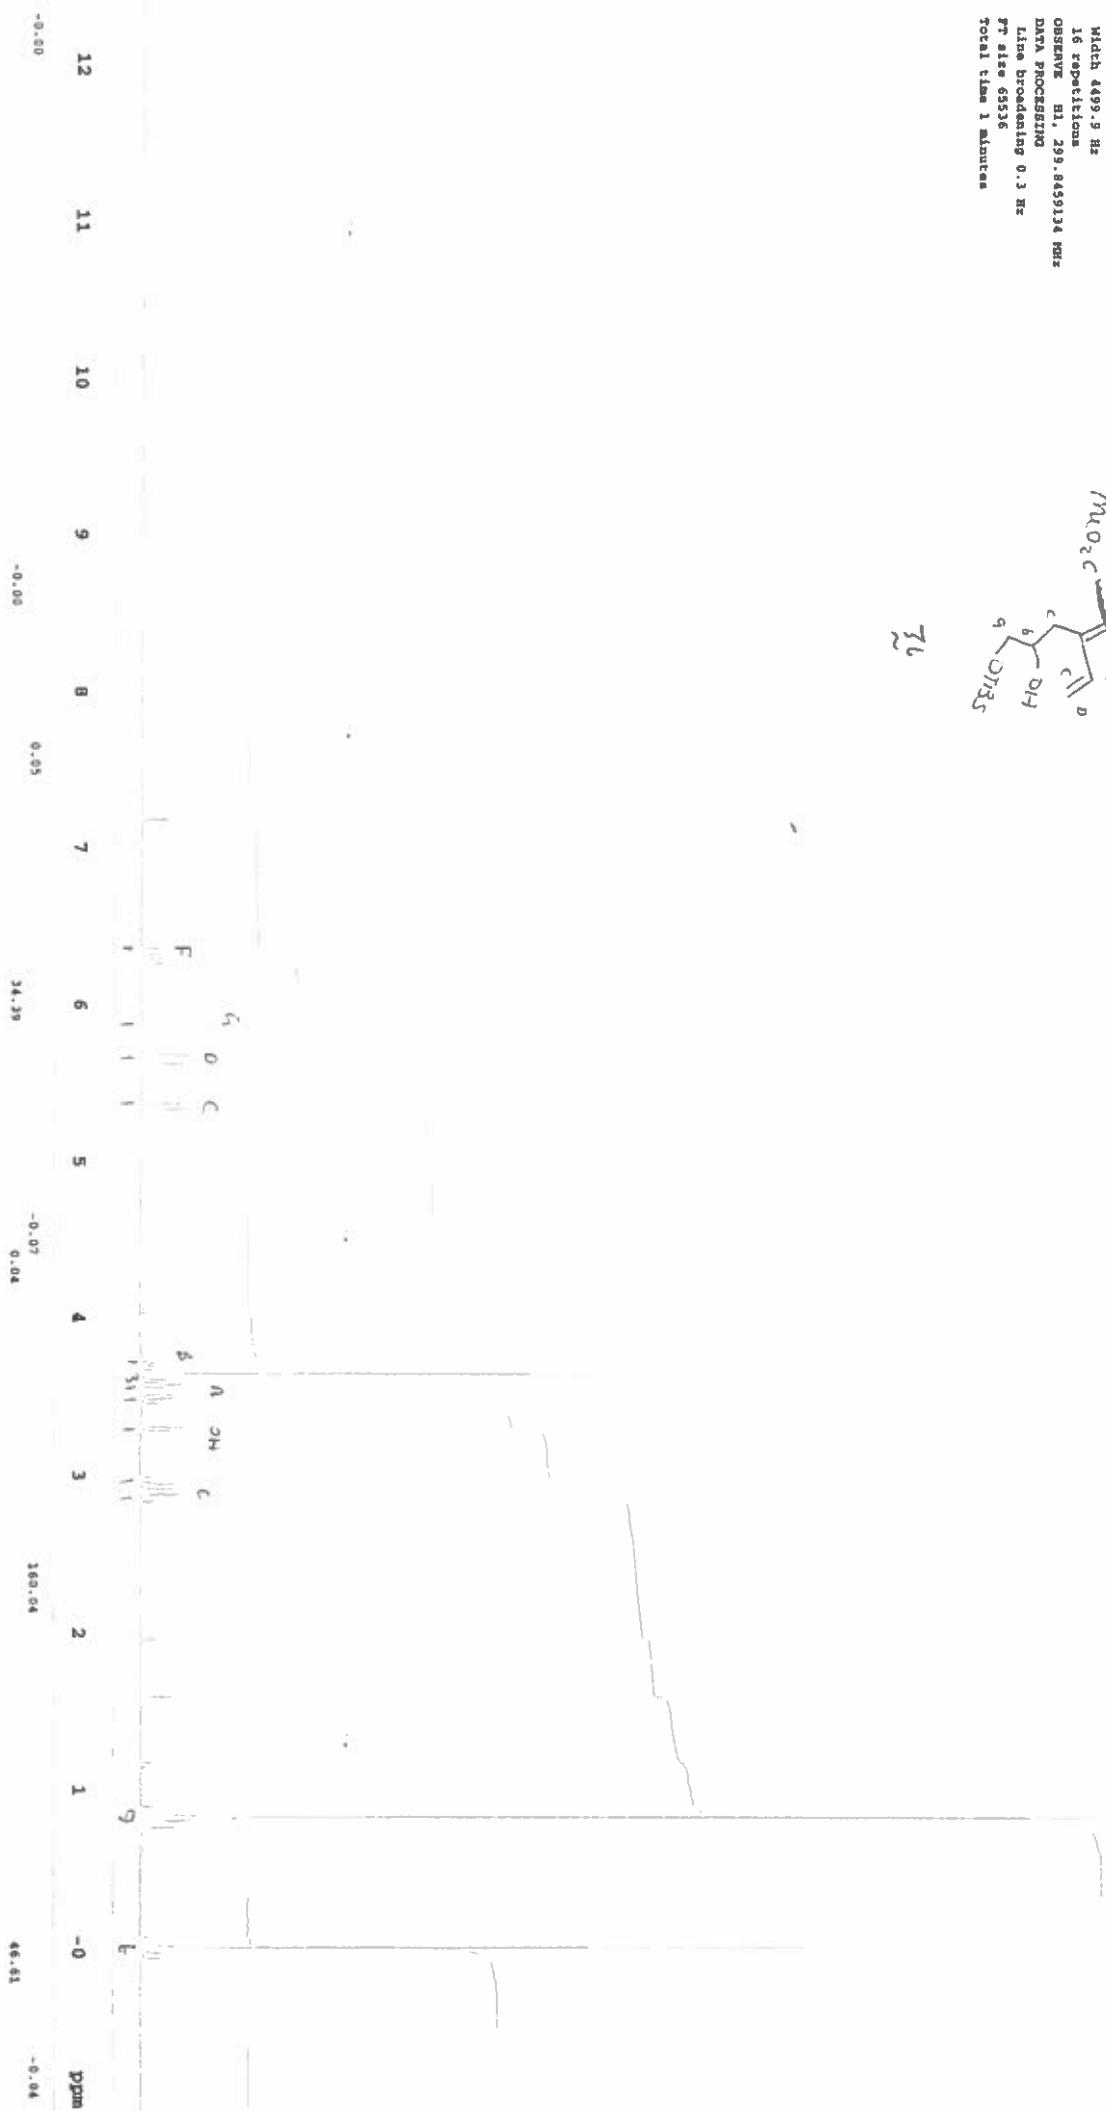

MATHEW O'BRIEN MOJ10/67/MP  
13C OBSERVE

Solvent: CDCl3  
Ambient temperature  
Sample #8  
File: 801  
Queue name: Jan19a  
DATE: Jan 19 02  
INSTR: 300 \*atlas\*

PULSE PROGRAM  
Pulse 45.0 degrees  
Acq. time 1.638 sec  
Width 20000.0 Hz  
4096 repetitions  
OBSERVE CH3, 75.363161 MHz  
DECOUPLE H1, 299.8472785 MHz  
Power 40 dB  
continuously on  
MAGZ-16 modulated  
DATA PROCESSING  
Line broadening 1.0 Hz  
PT size 65536  
Total time 111 minutes

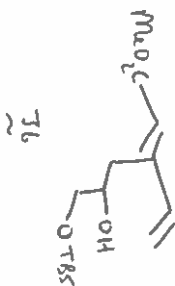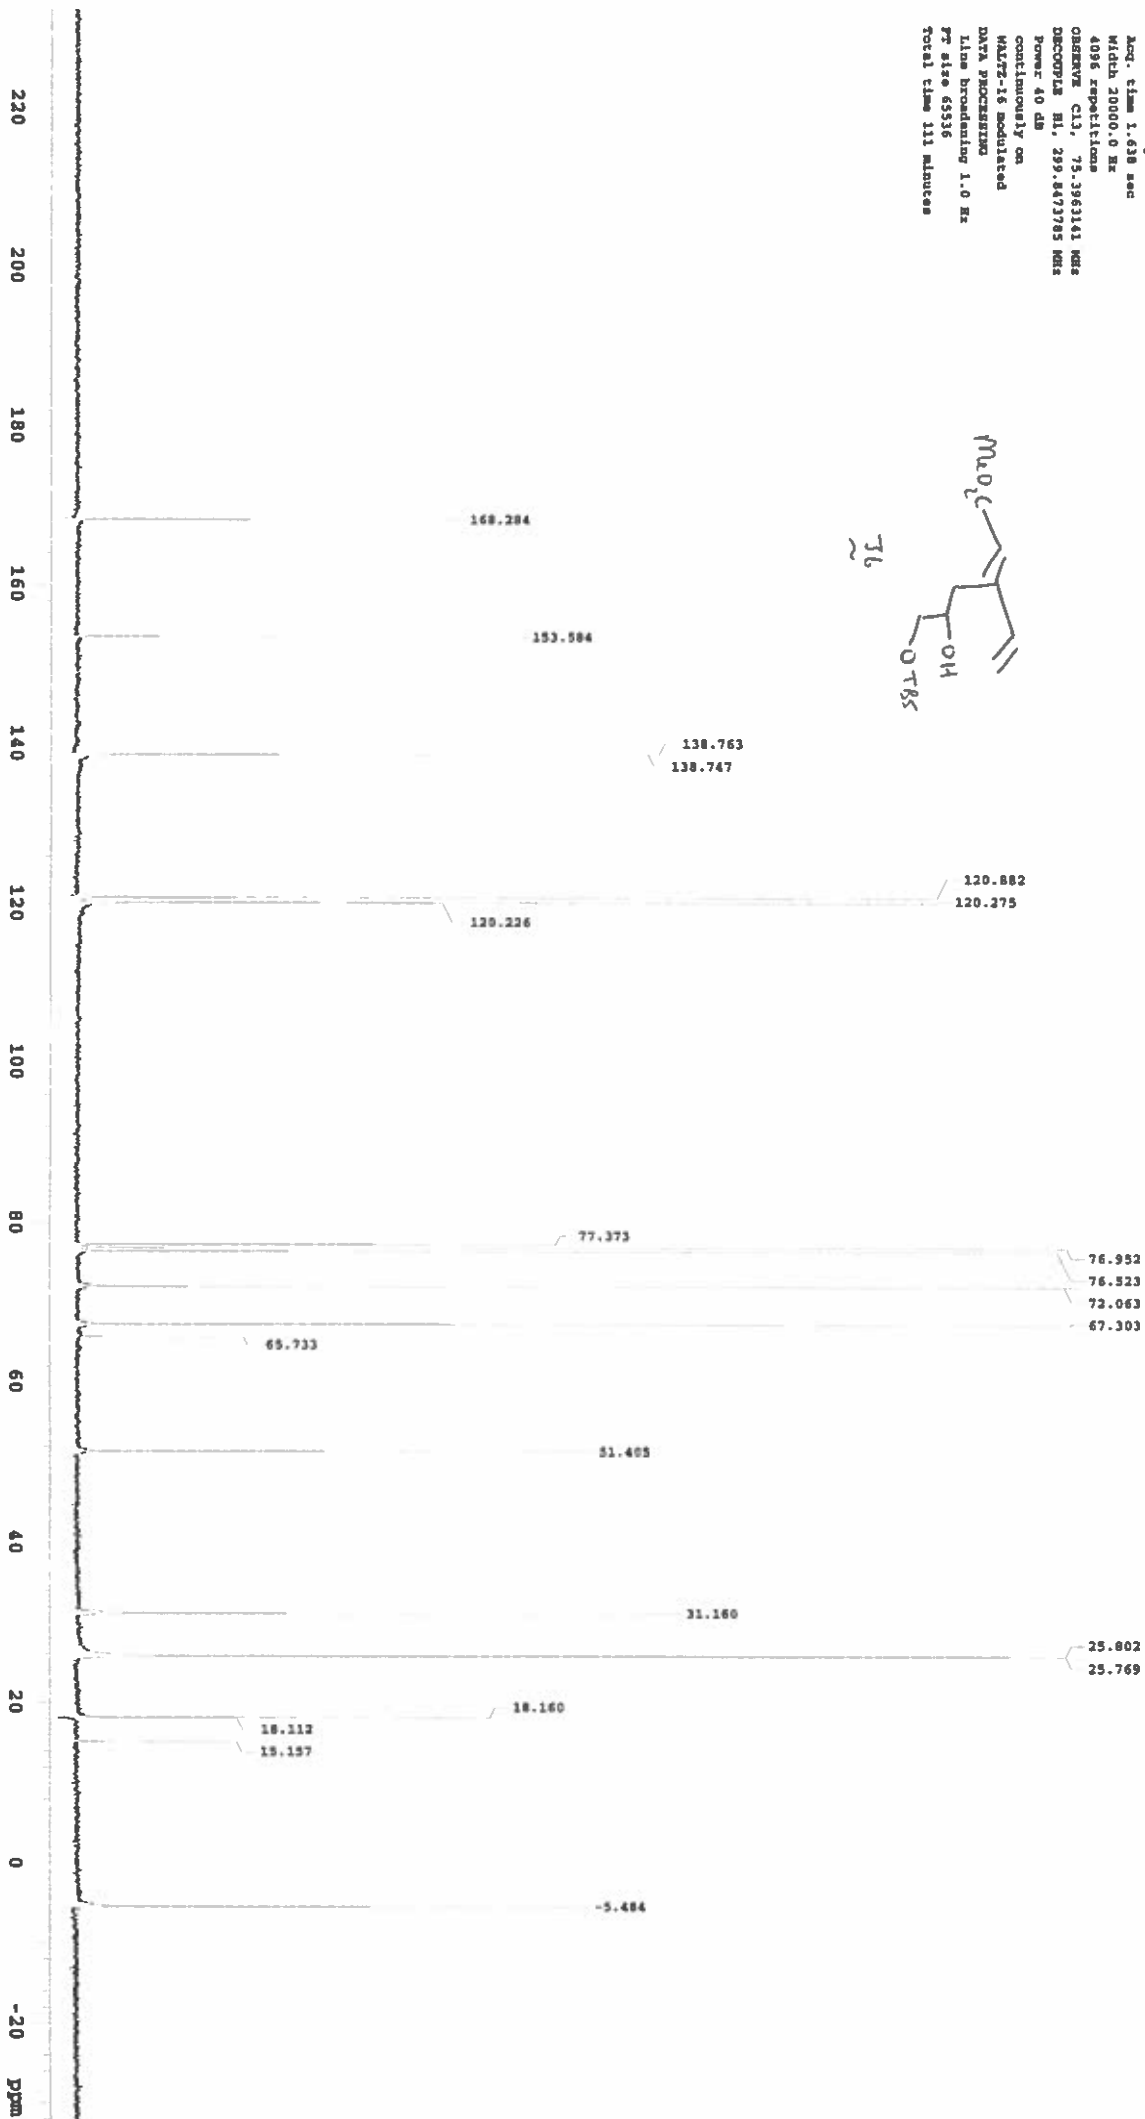

Matchew o'brien mol/096  
STANDARD IR OBSERVE

Solvent: CCl4  
Ambient temperature  
Sample #47  
File: 4701  
Queue name Ray06a  
DATE May 6 99  
INVA-100 \*ethos\*  
PULSE SEQUENCE  
Relax. delay 3.300 sec  
Pulse 90.0 degree  
Acq. time 3.641 sec  
Width 4499.9 Hz  
16 repetitions  
OBSERVE HL, 299.845669 MHz  
DATA PROCESSING  
Line broadening 0.3 Hz  
PT size 65536  
Total time 1 minutes

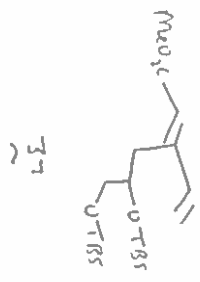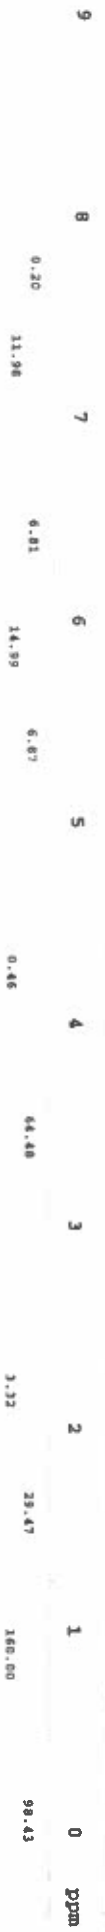



MATTHEW O'BRIEN MS10/70/COLL  
13C OBSERVE

Solvent: CDCl3  
Ambient temperature  
Sample #7  
File: 701  
Queue Name Jan19a  
Date Jan 19 02  
INOVA-100 'aloha'

PULSE SEQUENCE  
Pulse 45.0 degrees  
Acq. time 1.638 sec  
Width 20000.0 Hz  
4096 repetitions  
OBSERVE C13, 75.393141 MHz  
DECOUPLE H1, 299.8471765 MHz  
Power 40 dB  
continuously on  
WALTZ-16 modulated  
DATA PROCESSING  
Line broadening 1.0 Hz  
FT size 65536  
Total time 111 minutes

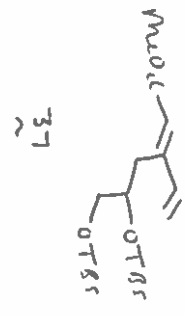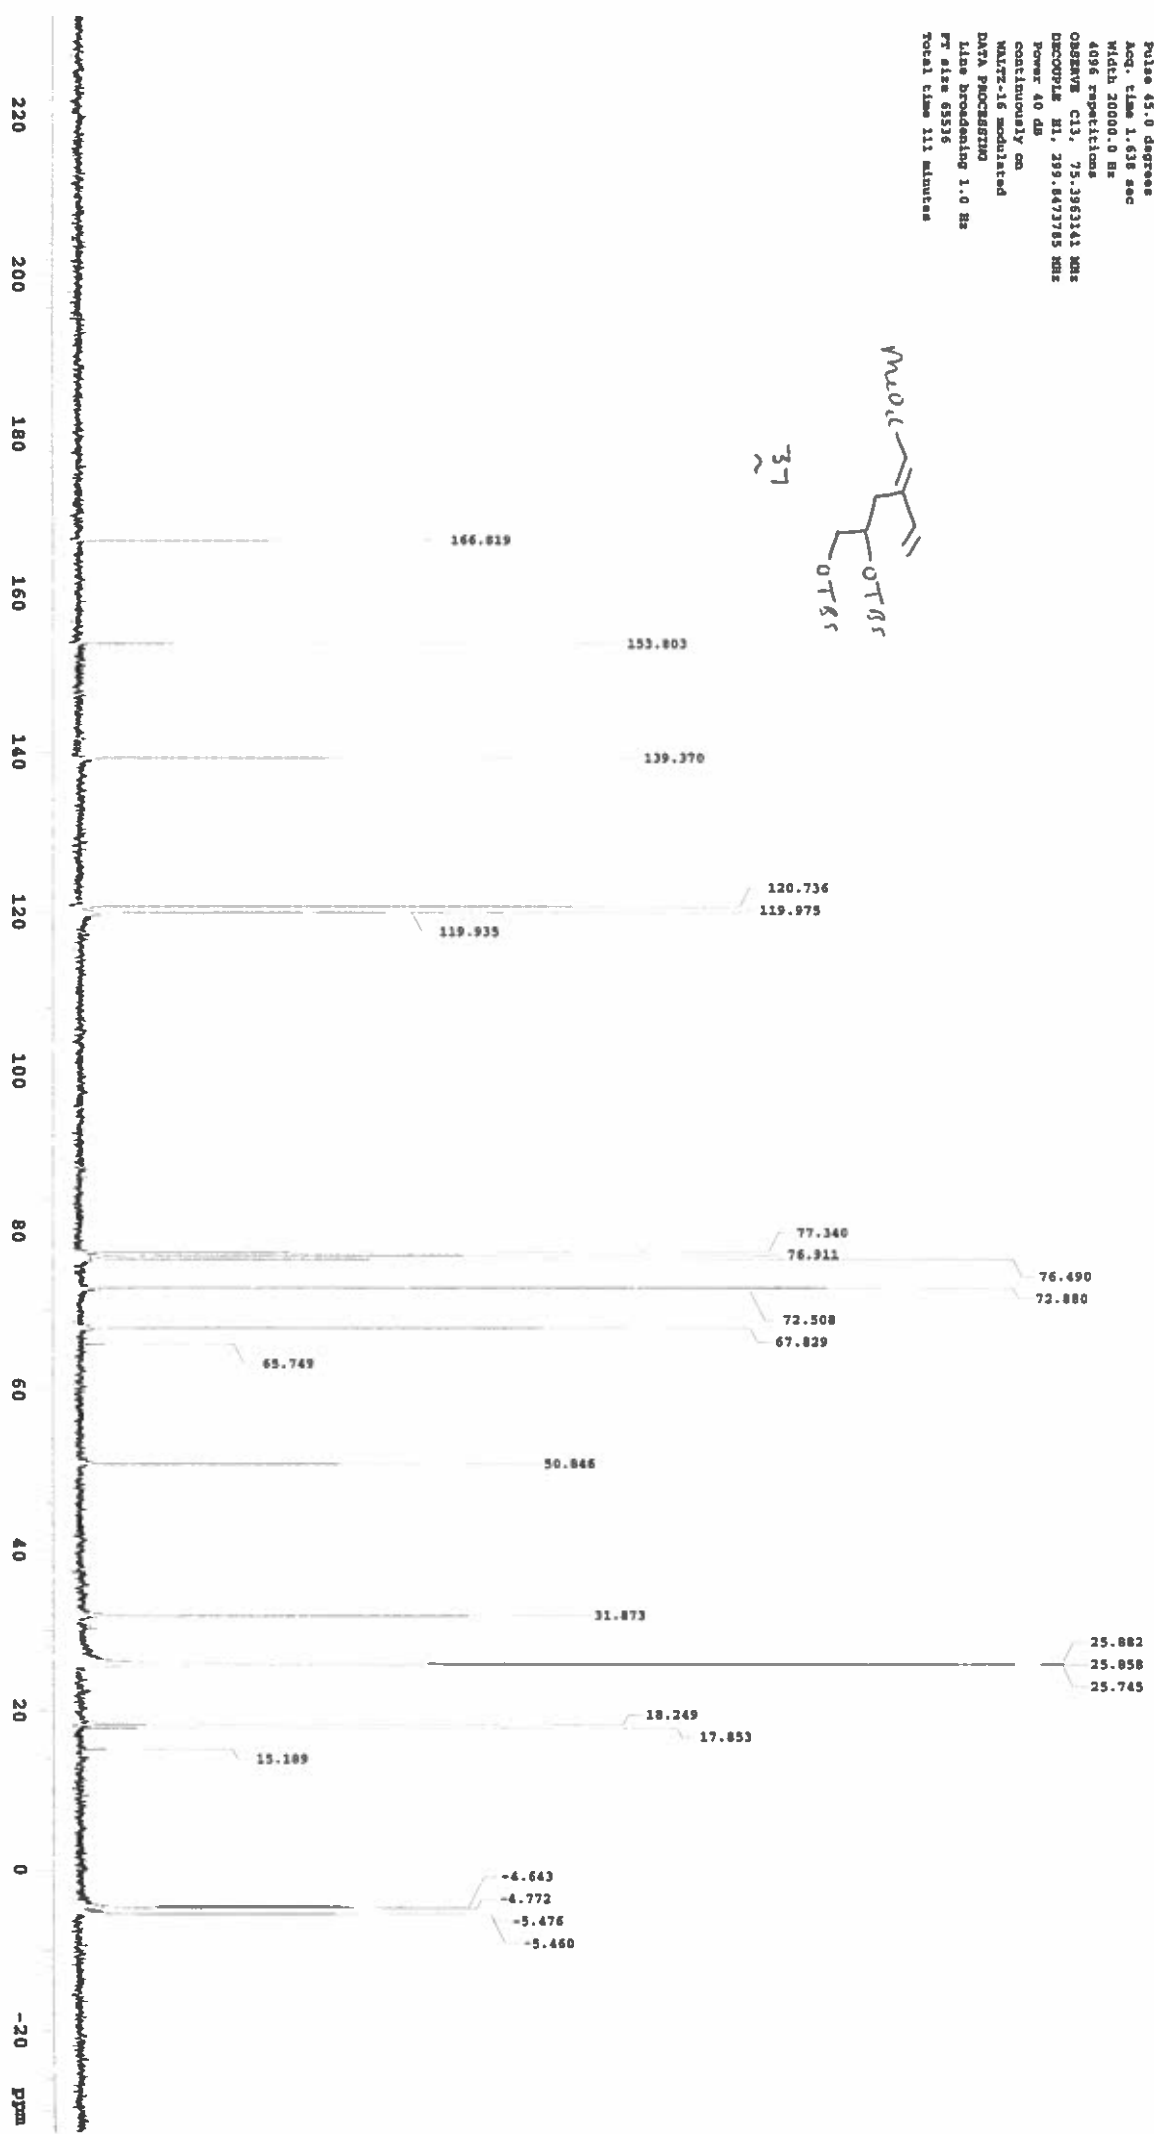

MATTHEW O'BRIEN MOB2/039/A  
STANDARD 1H OBSERVE

Solvent: CDCl3  
Ambient temperature

Sample #5  
File: 501  
Queue name Jul25a  
DATE Jul 25 99  
SHOW-100 "athos"

PULSE PROGRAM  
Relax. delay 3.300 sec  
Pulse 90.0 degree  
Acq. time 3.641 sec  
Width 6899.9 Hz  
16 repetitions

OBSERVE H1, 299.8459133 MHz  
DATA PROCESSING  
Line broadening 0.3 Hz  
PT size 65536  
Total time 1 minutes

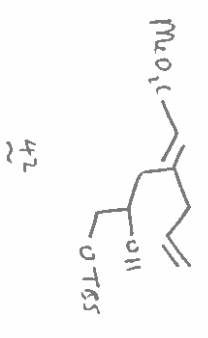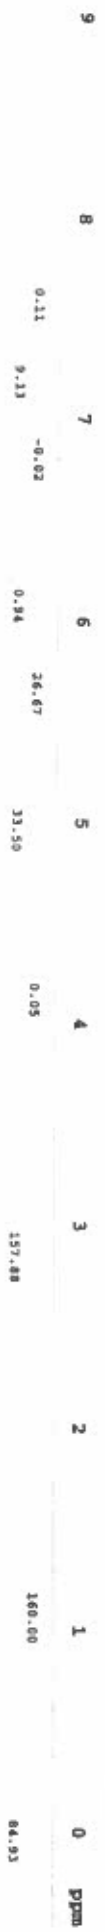

9 8 7 6 5 4 3 2 1 0 ppm

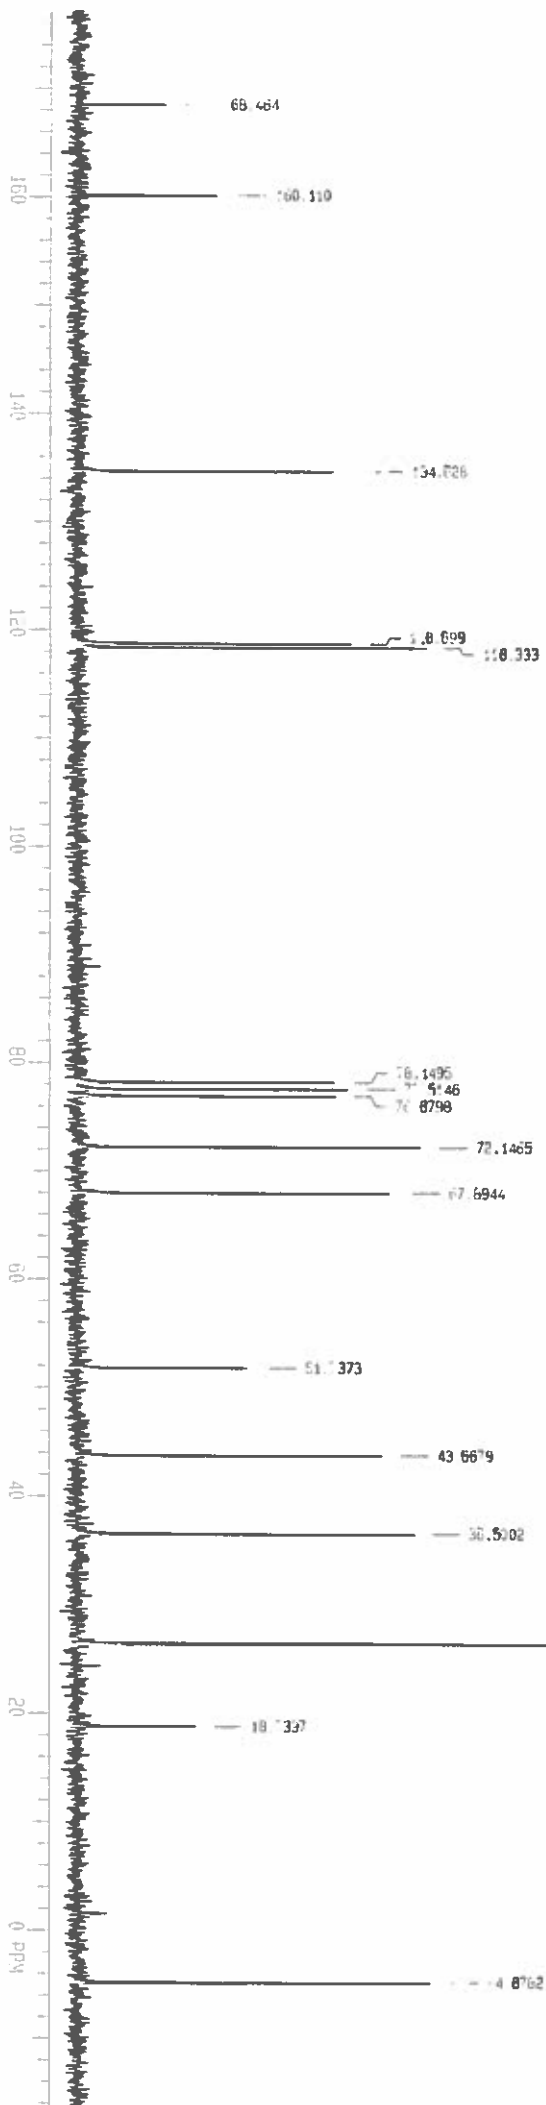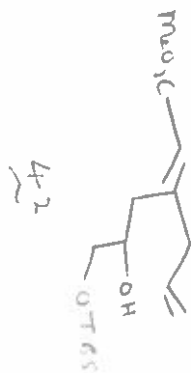

bob cuprate addition  
STANDARD IR OBSERVE

Automation directory: /data/instrdata/June8  
File: 0701

Pulse sequence: s2pu1  
Solvent: cdcl3  
Ambient temperature  
Sample #7  
File: 0701  
INOVA-300 \*zaccy\*

Relax. delay 1.000 sec  
Pulse 45.0 degrees  
Acq. time 3.744 sec  
Width 4797.6 Hz  
16 repetitions  
OBSERVE F1: 299.8458792 MHz  
DATA PROCESSING  
Pr size 65316  
Total time 1 min, 16 sec

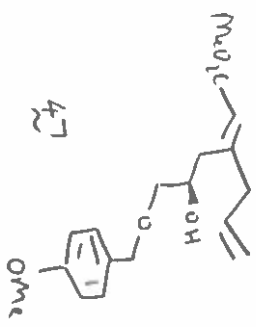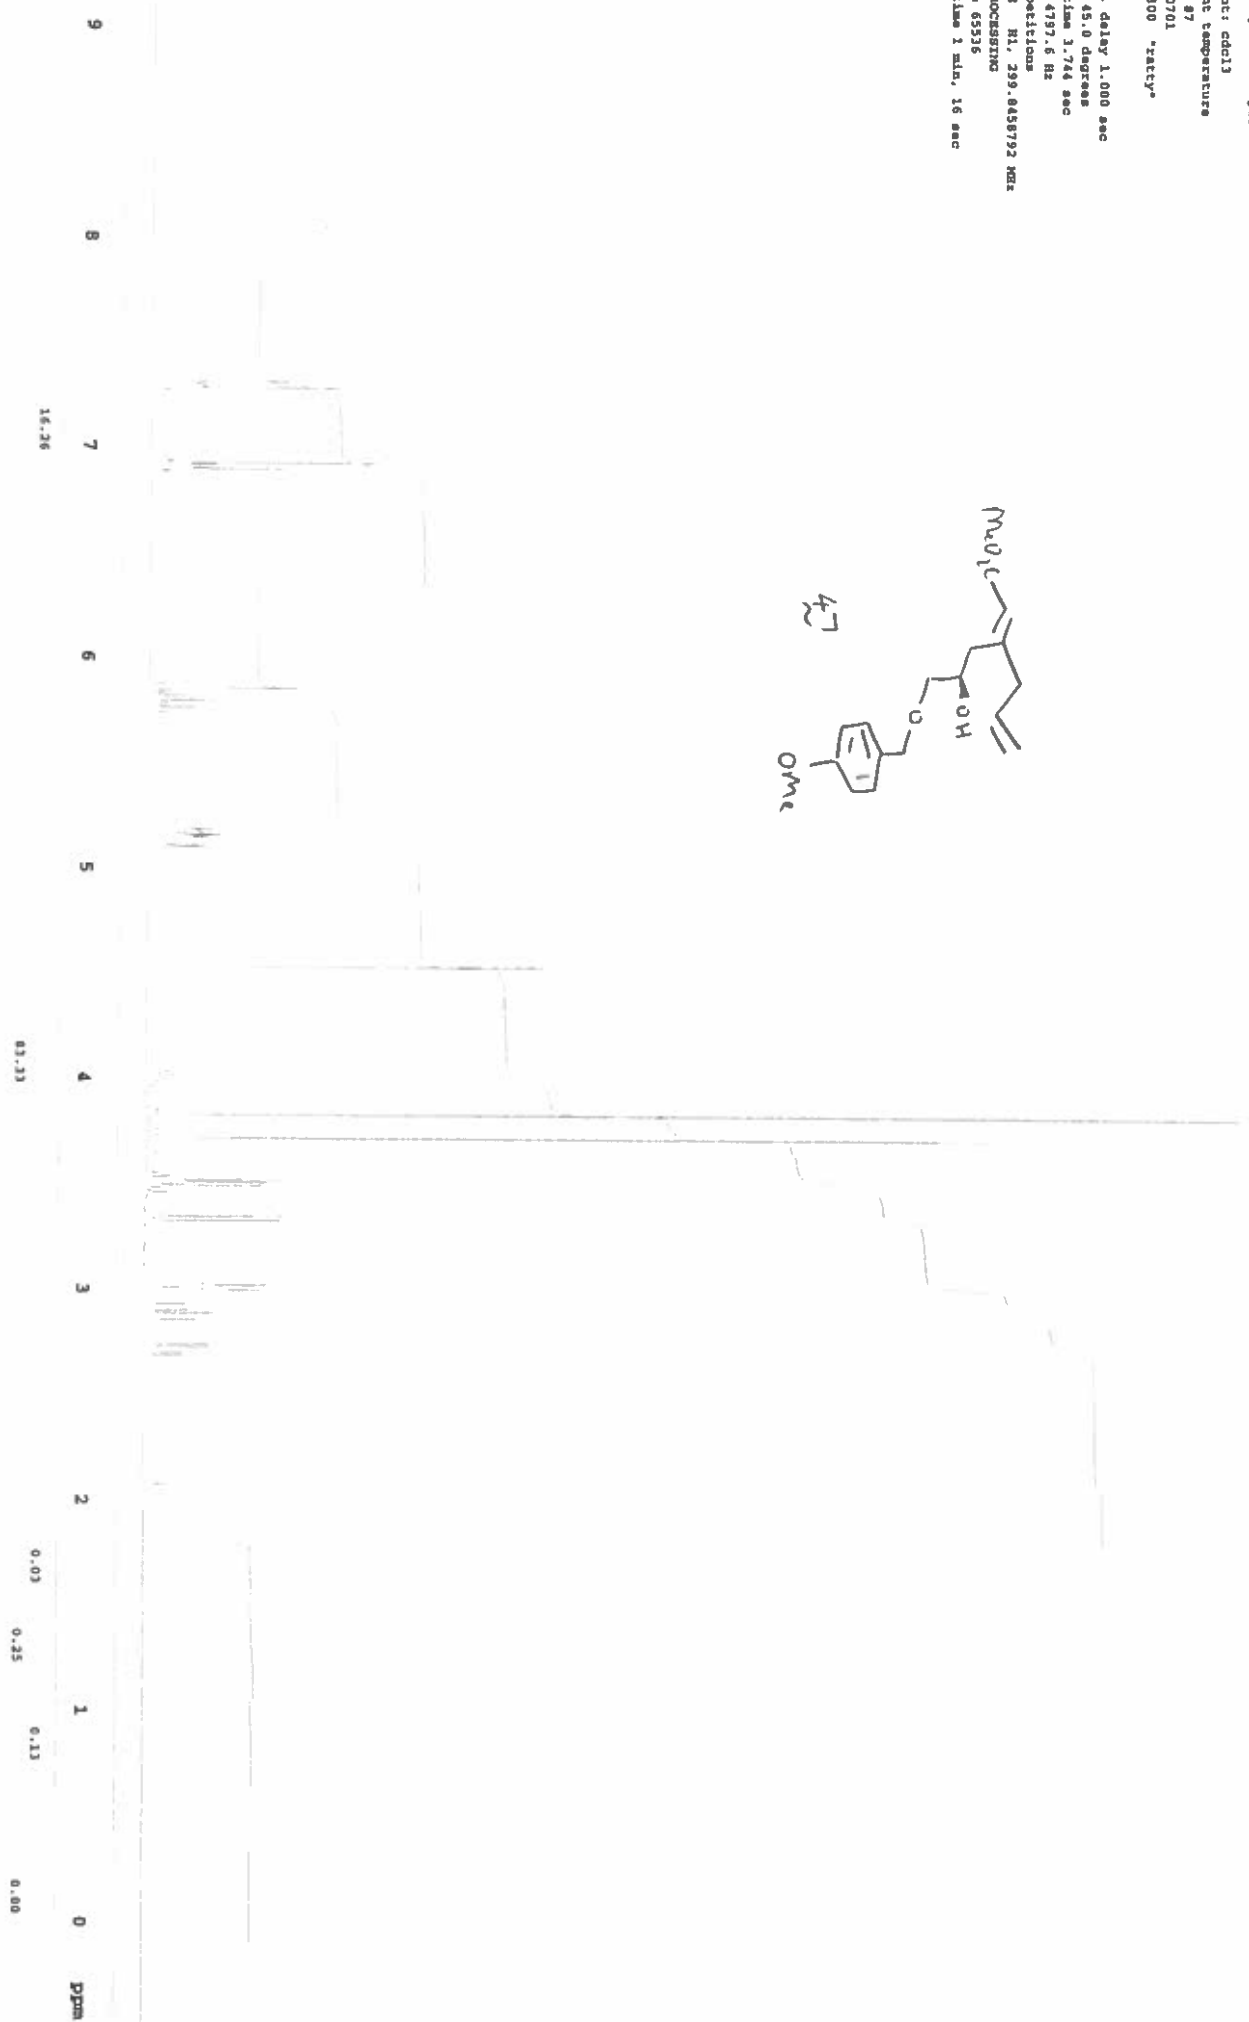

Automation directory: /data/rawdata/Jun18  
File: 0702

Pulse sequence: zgpg30  
Solvent: cdcl3  
Ambient temperature  
Sample #7  
File: 0702  
INOVA-300 "empty"

Relax. delay 1.000 sec  
Pulse 45.0 degrees  
Acq. time 1.815 sec  
Width 18850.1 Hz  
128 repetitions  
OBSERVE C13, 75.362803 MHz  
DECUPLE R1, 299.8473786 MHz  
Power 37 dB  
continuously on  
VATZ-16 modulated  
DATA PROCESSING  
Line broadening 1.0 Hz  
Pt size 131072  
Total time 12 min, 2 sec

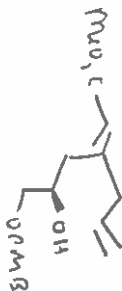

47

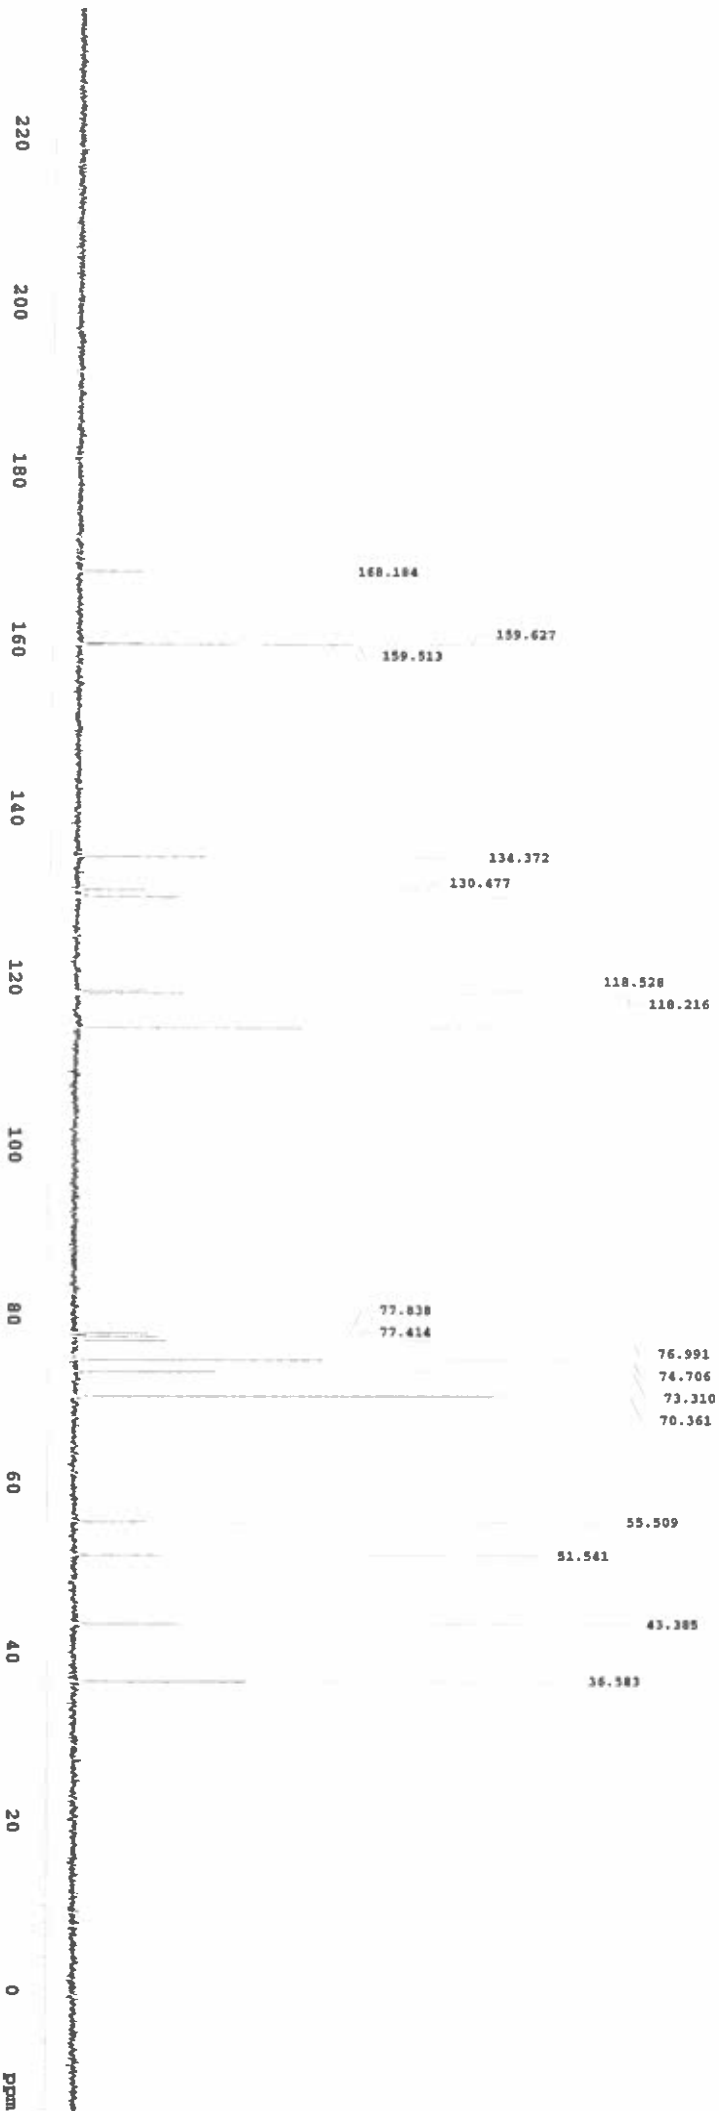

bbp phosphonate coupling product phase 1 esters  
STANDARD 1H OBSRVZ

Autocreation directory: /data/omdata/Unit1  
File: 4502

Pulse Sequence: zgpul  
Solvent: cdcl3  
Ambient temperature  
Sample 845  
File: 4502  
INOVA-300 "zacty"

Relax. delay 1.000 sec  
Pulse 45.0 degrees  
Acq. time 3.744 sec  
Width 3827.6 Hz  
16 repetitions  
OBSRVZ HI, 259.8458793 MHz  
DATA PROCESSING  
PR size 32768  
Total time 1 min, 16 sec

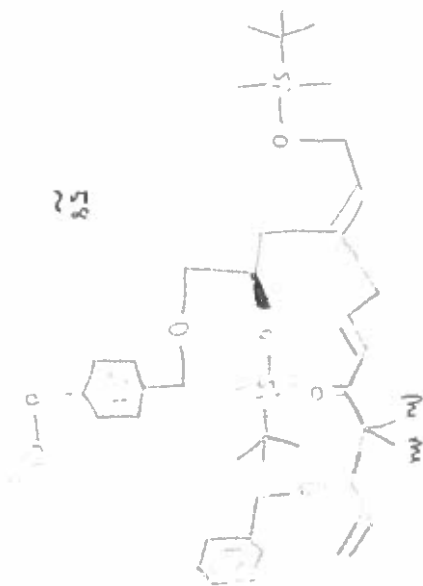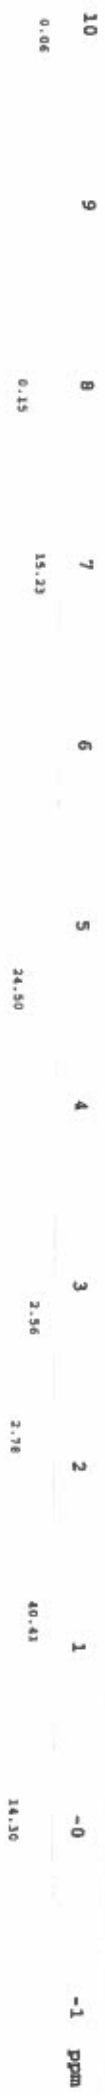

Automation directory: /data/rmdata/Unit7  
File: 4503

Pulse Sequence: s2pul  
Solvent: cdcl3  
Ambient temperature  
Sample #45  
P1: 4503  
IROVA-300 "entry"

Relax. delay 1.000 sec  
Pulse 45.0 degrees  
Acq. time 1.815 sec  
Width 18930.1 Hz  
128 repetitions  
OBSERVE C13, 75.362883 MHz  
DECUPLE H1, 399.8673786 MHz  
Power 37 dB  
continuously on  
MAG2-16 modulated  
DATA PROCESSING  
Line broadening 1.0 Hz  
PT else 131072  
Total time 12 min, 2 sec

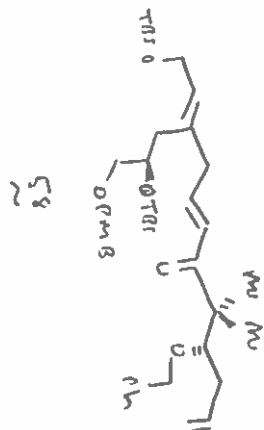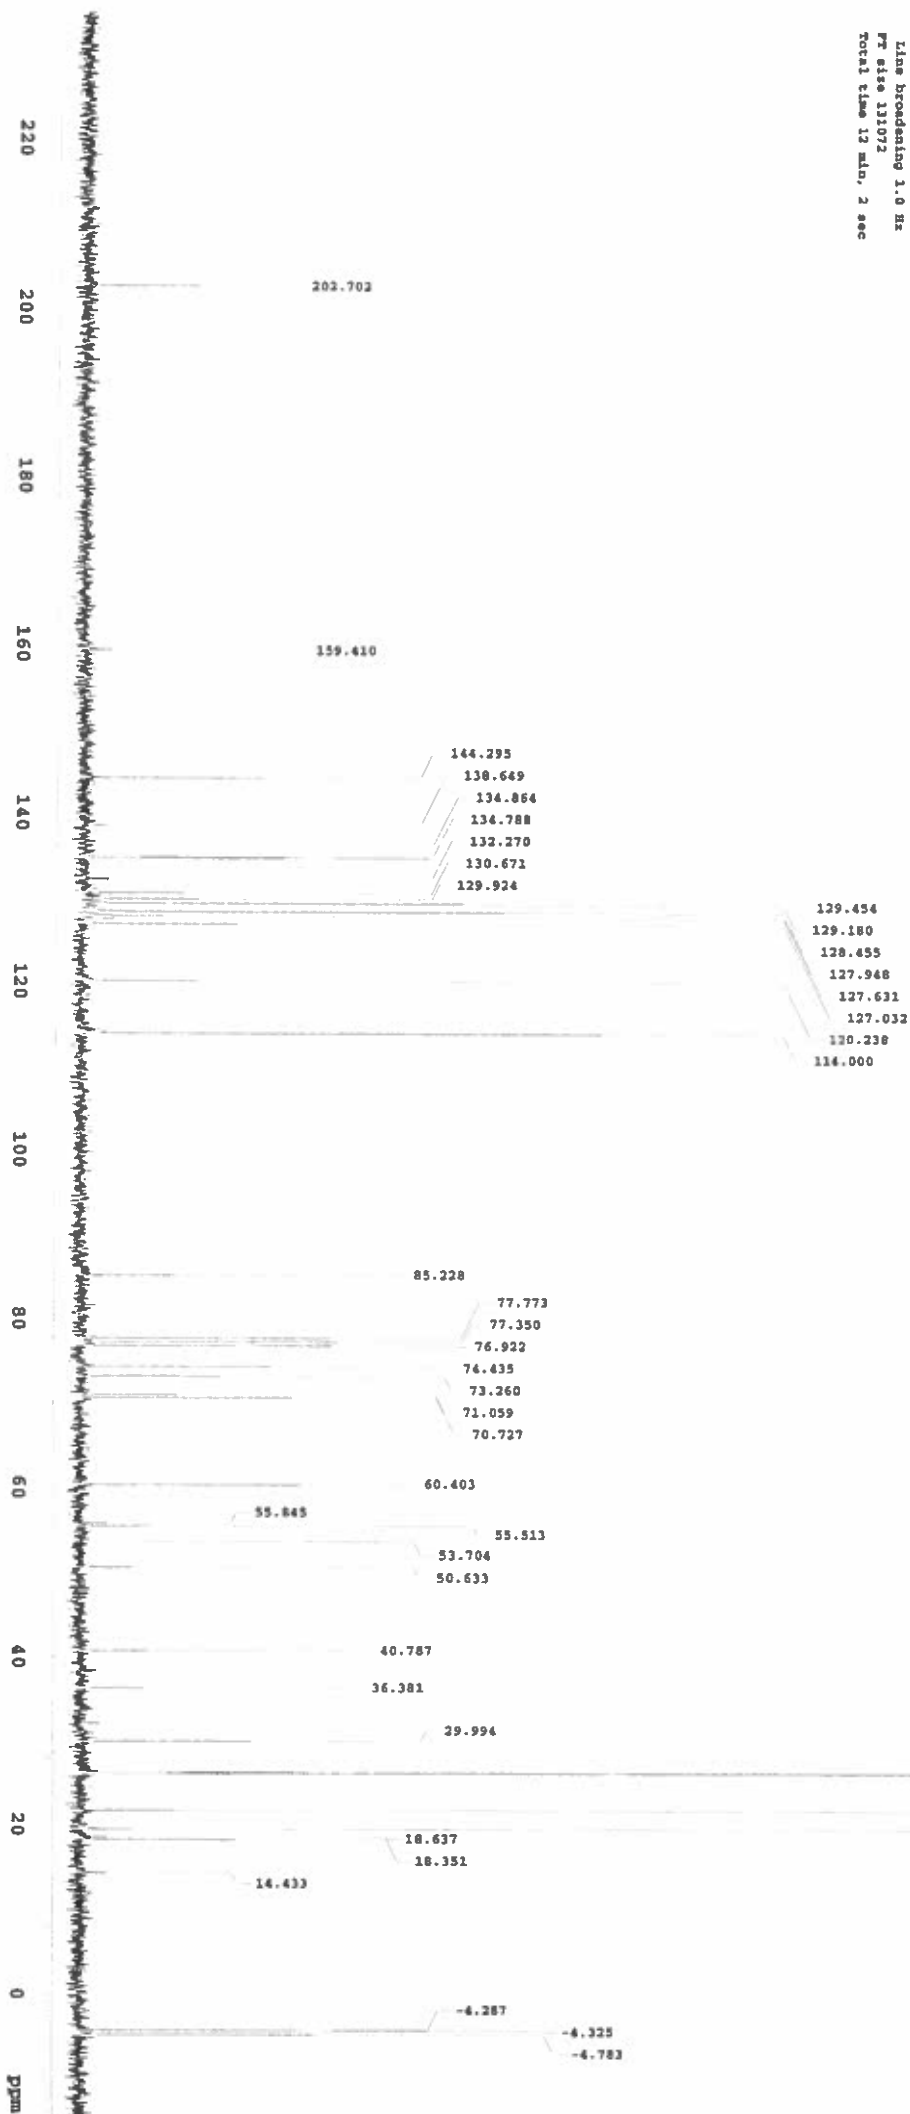

mbi 190/1 (a)  
STANDARD IR OBSERVE

Automation directory: /data/nmrdata/20026  
File: 1401

Pulse Sequence: zgpg1  
Solvent: cdcl3  
Ambient temperature  
Sample #34  
F1: 1401  
INNOVA-300 "entry"

Relax. delay 1.000 sec  
Pulse 45.0 degrees  
Acq. time 3.744 sec  
Width 4797.6 Hz  
16 repetitions  
OBSERVE H1, 299.8458792 MHz  
DATA PROCESSING  
PT size 65516  
Total time 1 min, 16 sec

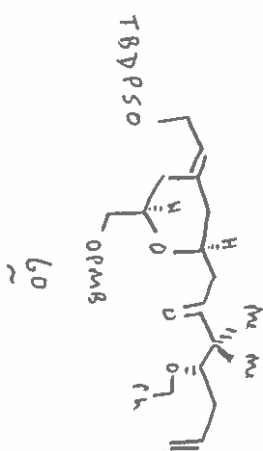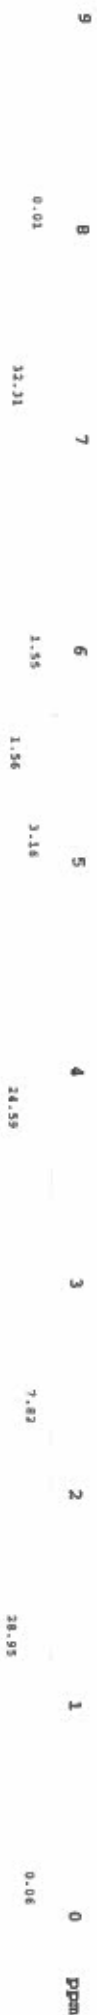



Automation directory: /data/nmrdata/7mz6  
File: 1503

Pulse Sequence: zgpg1  
Solvent: cdcl3  
Ambient temperature  
Sample 815  
File: 1503  
INOVA-100 "reilly"

Relax. delay 1.000 sec  
Pulse 45.0 degrees  
Acq. time 1.815 sec  
Width 1650.1 Hz  
64 repetitions  
OBSERVE C13, 75.3962883 MHz  
DECODE H1, 299.8473786 MHz  
Power 37 dB  
continuously on  
WALTZ-16 modulated  
DATA PROCESSING  
Line Broadening 1.0 Hz  
PT size 131072  
Total time 13 min, 2 sec

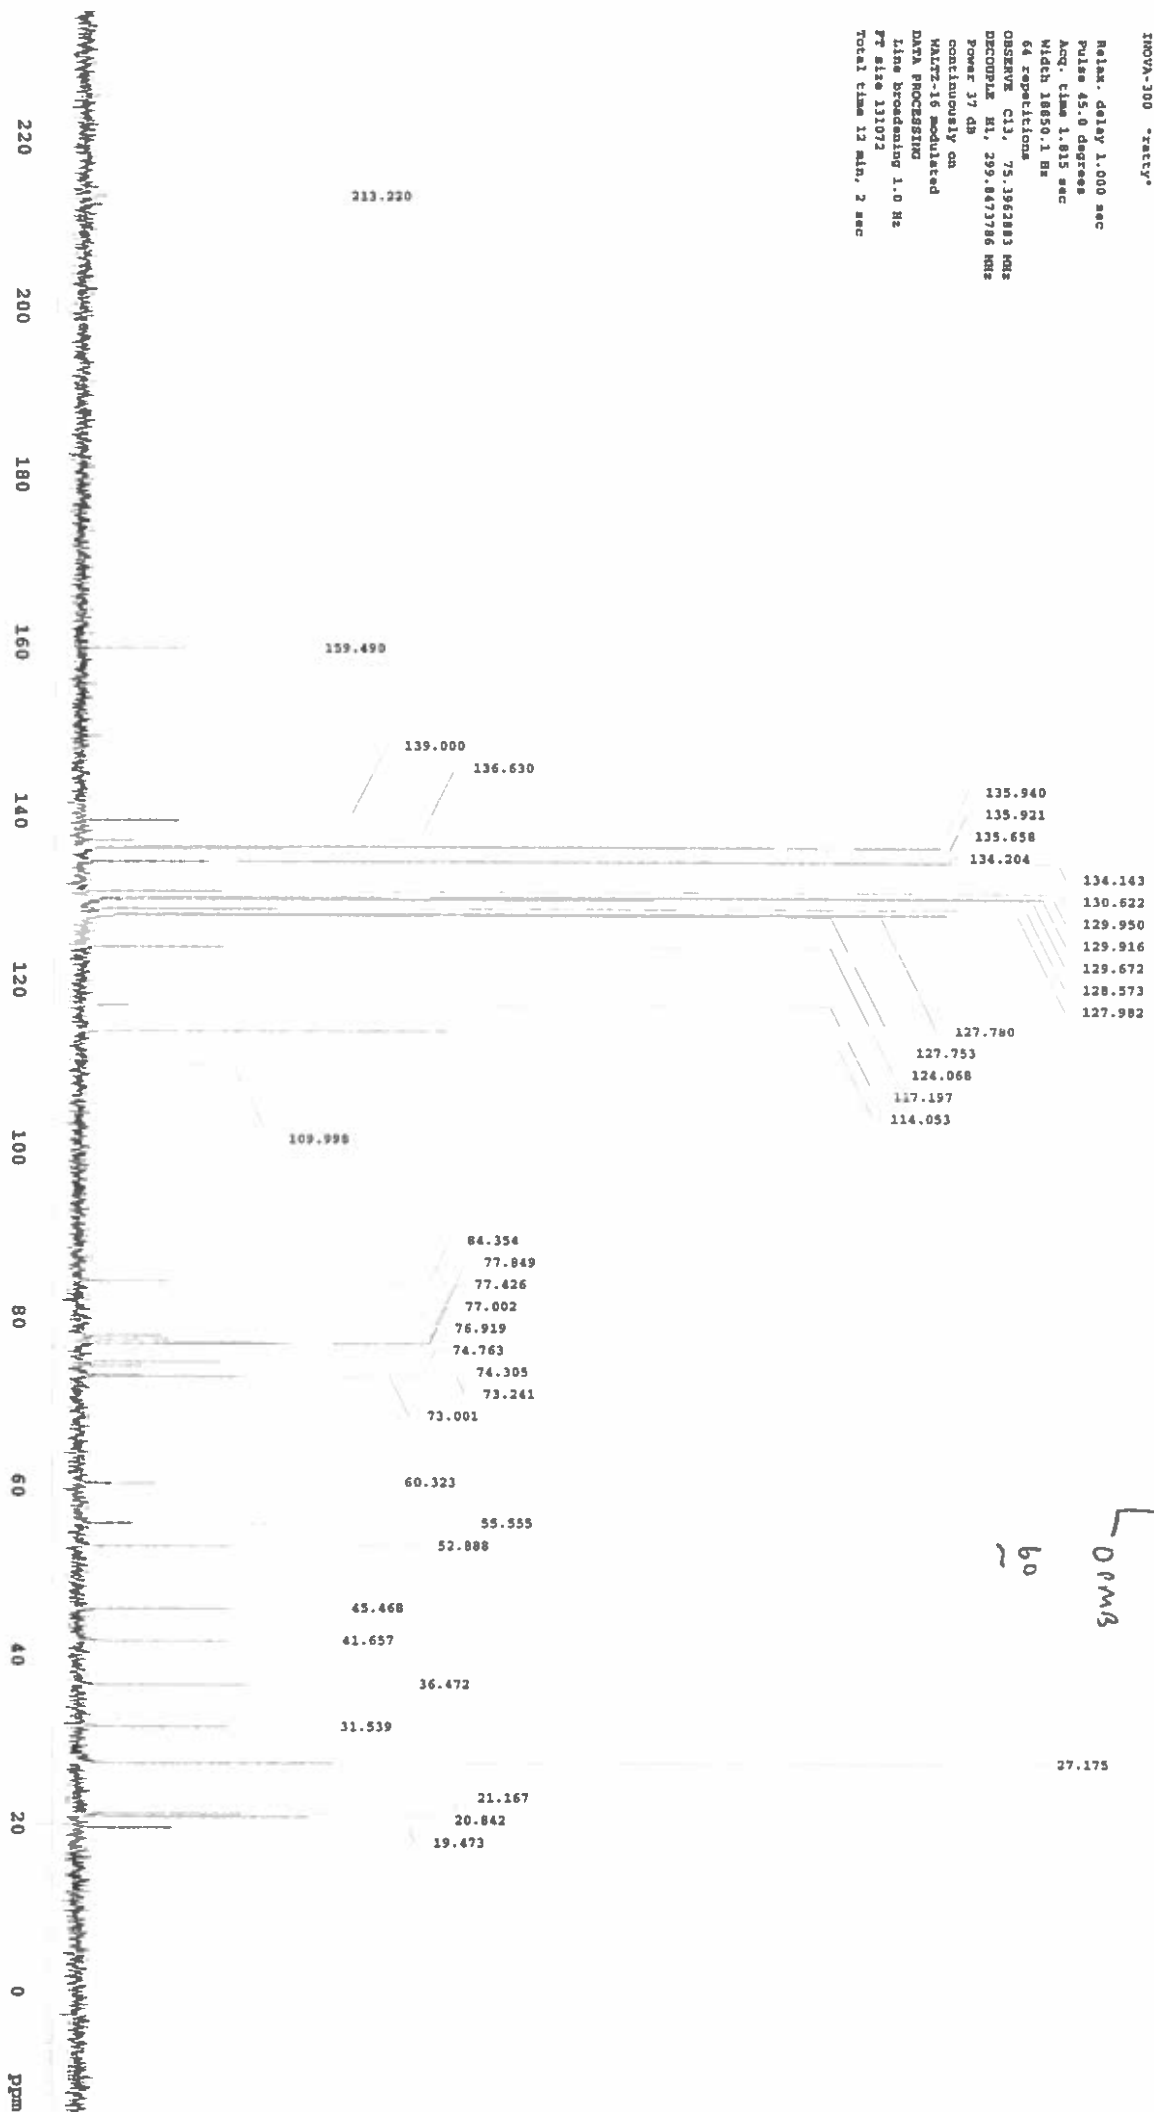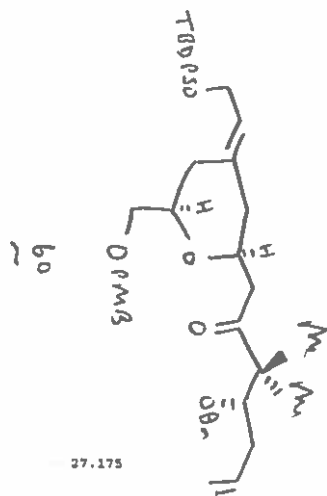

mbi 202/1 puze  
STANDARD IR OBSERVE

Automation directory: /data/wwdata/Aug08  
File: 1502

Pulse Sequence: zgpg30  
Solvent: cdcl3  
Ambient temperature  
Sample #15  
File: 1502  
INOVA-300 "zerety"

Relax. delay 1.000 sec  
Pulse 45.0 degrees  
Acq. time 3.744 sec  
Width 4797.6 Hz  
16 repetitions  
OBSERVE: H1, 299.8458792 MHz  
DATA PROCESSING  
PT size 65536  
Total time 1 min, 16 sec

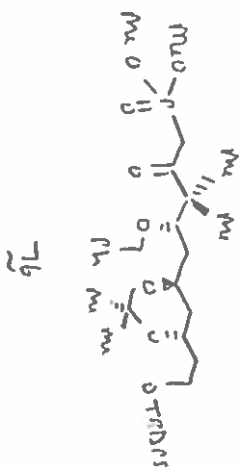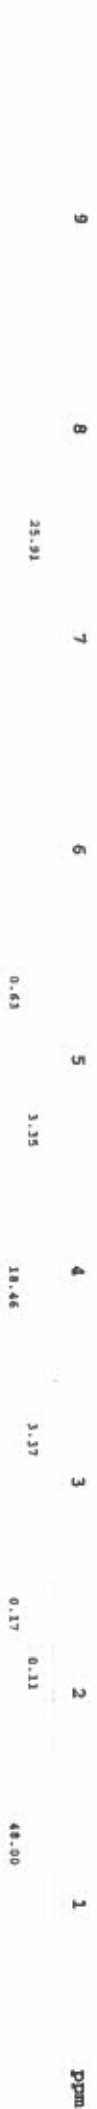

mb1 202/1 pure  
STANDARD IR OBSERVE

Automation directory: /data/rawdata/Aug11  
File: 2003

Pulse Sequence: s2pul  
Solvent: cdcl3  
Ambient temperature  
Sample #28  
File: 2003  
INOVA-300 "ratty"

Relax. delay 1.000 sec  
Pulse 45.0 degrees  
Acq. time 1.815 sec  
Width 18850.1 Hz  
256 repetitions  
OBSERVE C13, 75.362883 MHz  
DECOUPLE H1, 299.8473786 MHz  
Power 37 dB  
continuously on  
WALTZ-16 modulated  
DATA PROCESSING  
Line broadening 1.0 Hz  
PT aise 131072  
Total time 17 min, 2 sec

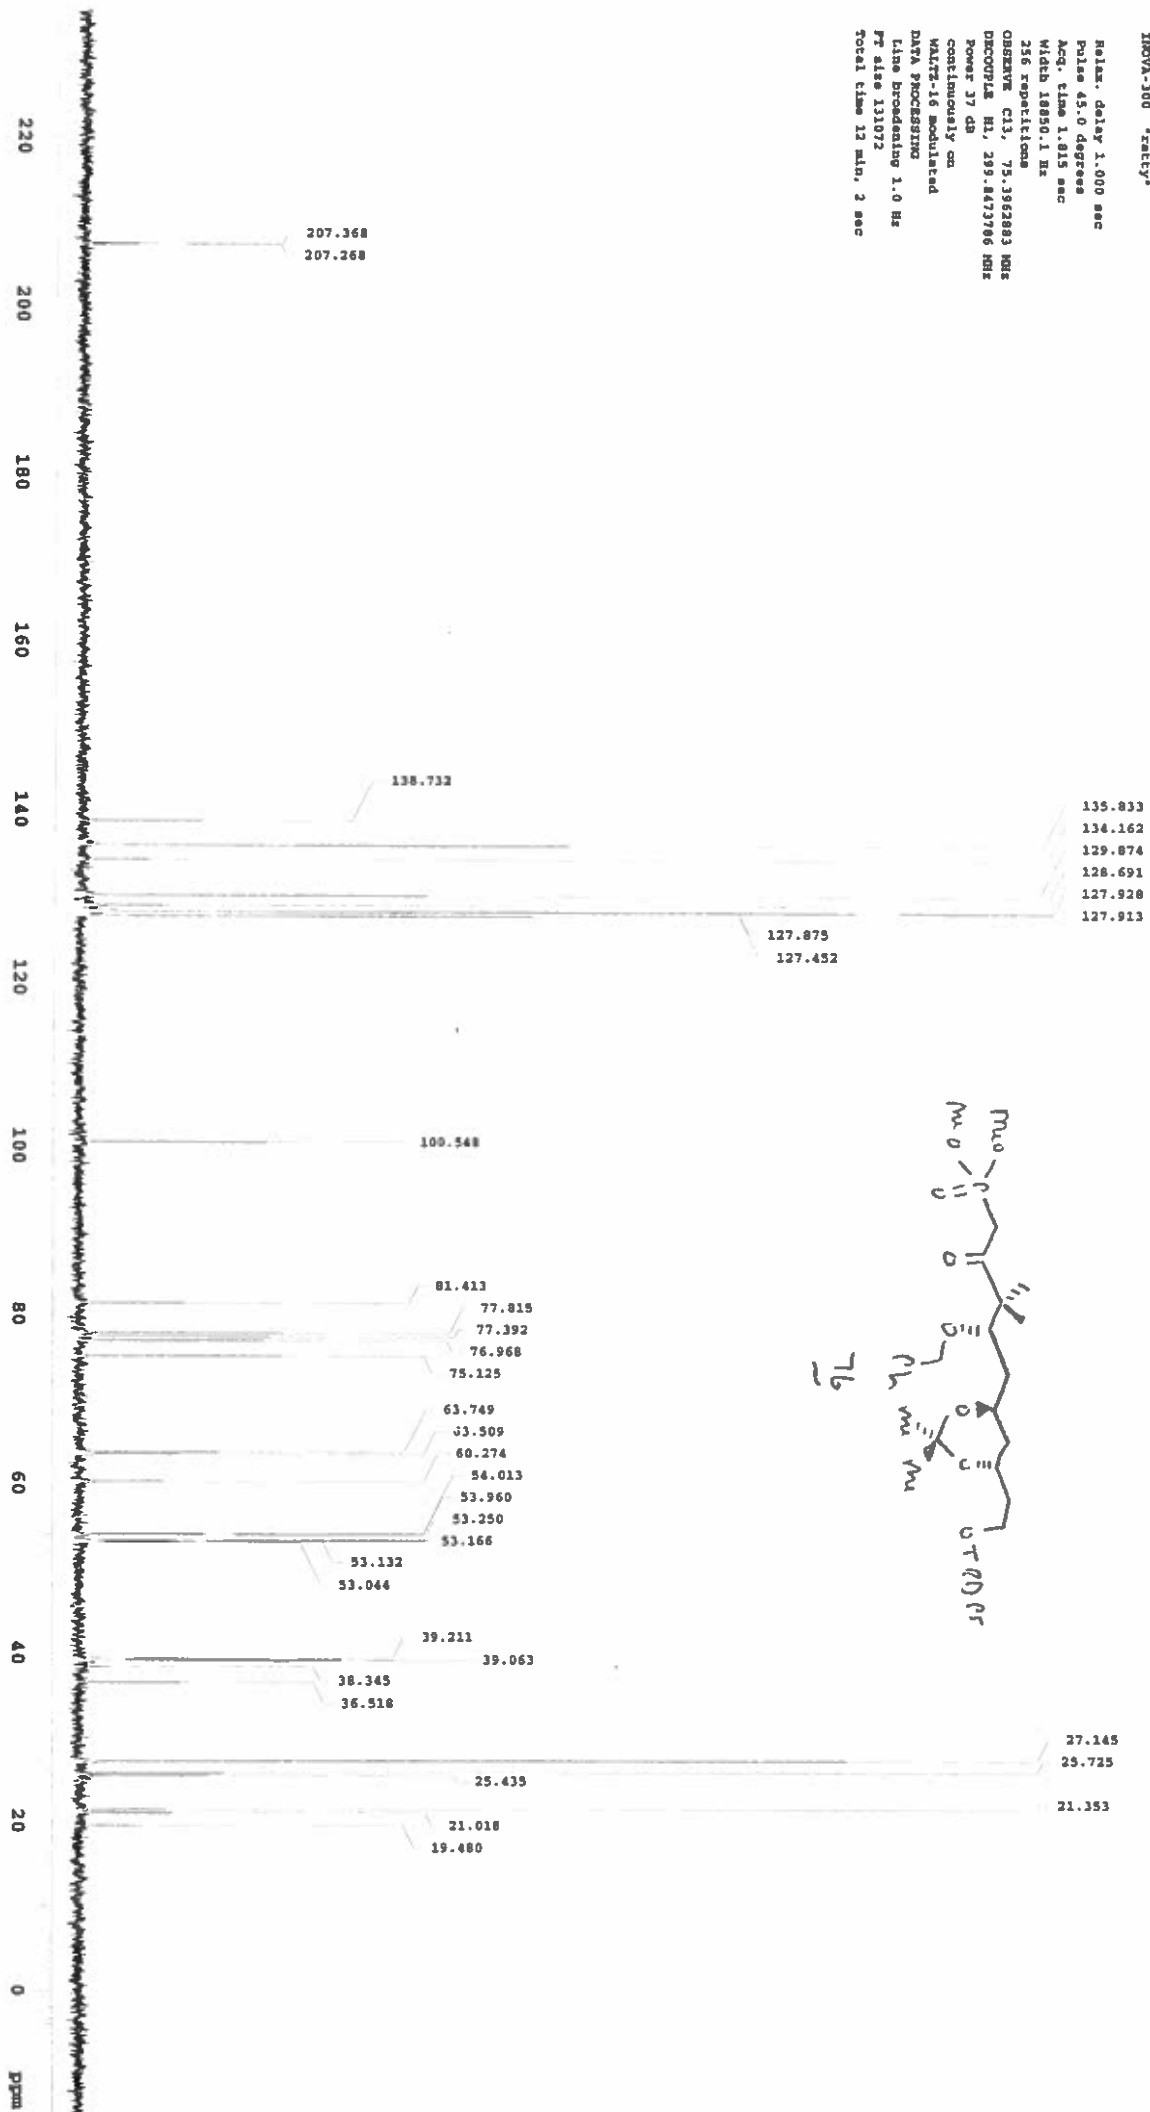

mb1 213/1 pure  
SPRIMMAD 18 OBSERVE

Automation directory: /data/rawdata/sep10  
File: 1101

Pulse sequence: zgpg1  
Solvent: cdcl3  
Ambient temperature  
Sample #11  
File: 1101  
INOVA-300 \*rmtty\*

Relax. delay 1.000 sec  
Pulse 45.0 degrees  
Acq. time 3.744 sec  
Width 4797.6 Hz  
16 repetitions  
OBSERVE M1. 289.8658792 MHz  
DATA PROCESSING  
Ft size 65536  
Total time 1 min. 16 sec

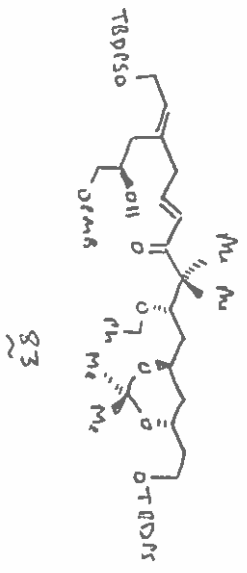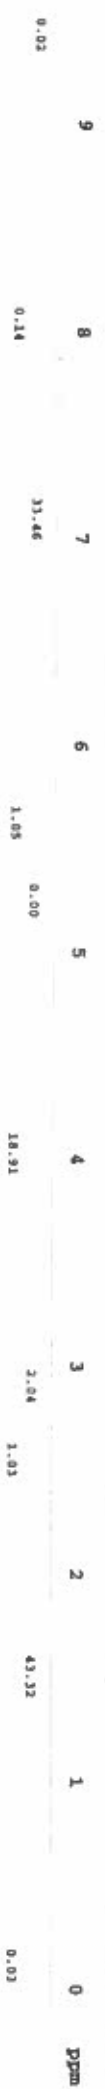

Automation directory: /data/rawdata/sep11  
File: 0704

Pulse Sequence: s2pul  
Solvent: cdcl3  
Ambient temperature  
Sample: 87  
File: 0704  
INOVA-300 "xatly"

Relax. delay 1.000 sec  
Pulse 45.0 degrees  
Acq. time 1.615 sec  
Width 18850.1 Hz  
2048 repetitions  
OBSERVE CH3, 75.362893 MHz  
DECOUPLE H1, 299.627186 MHz  
Power 17 dB  
continuously on  
WALTZ-16 modulated  
DATA PROCESSING  
Line broadening 1.0 Hz  
FT size 131072  
Total time 1 hr, 36 min, 23 sec

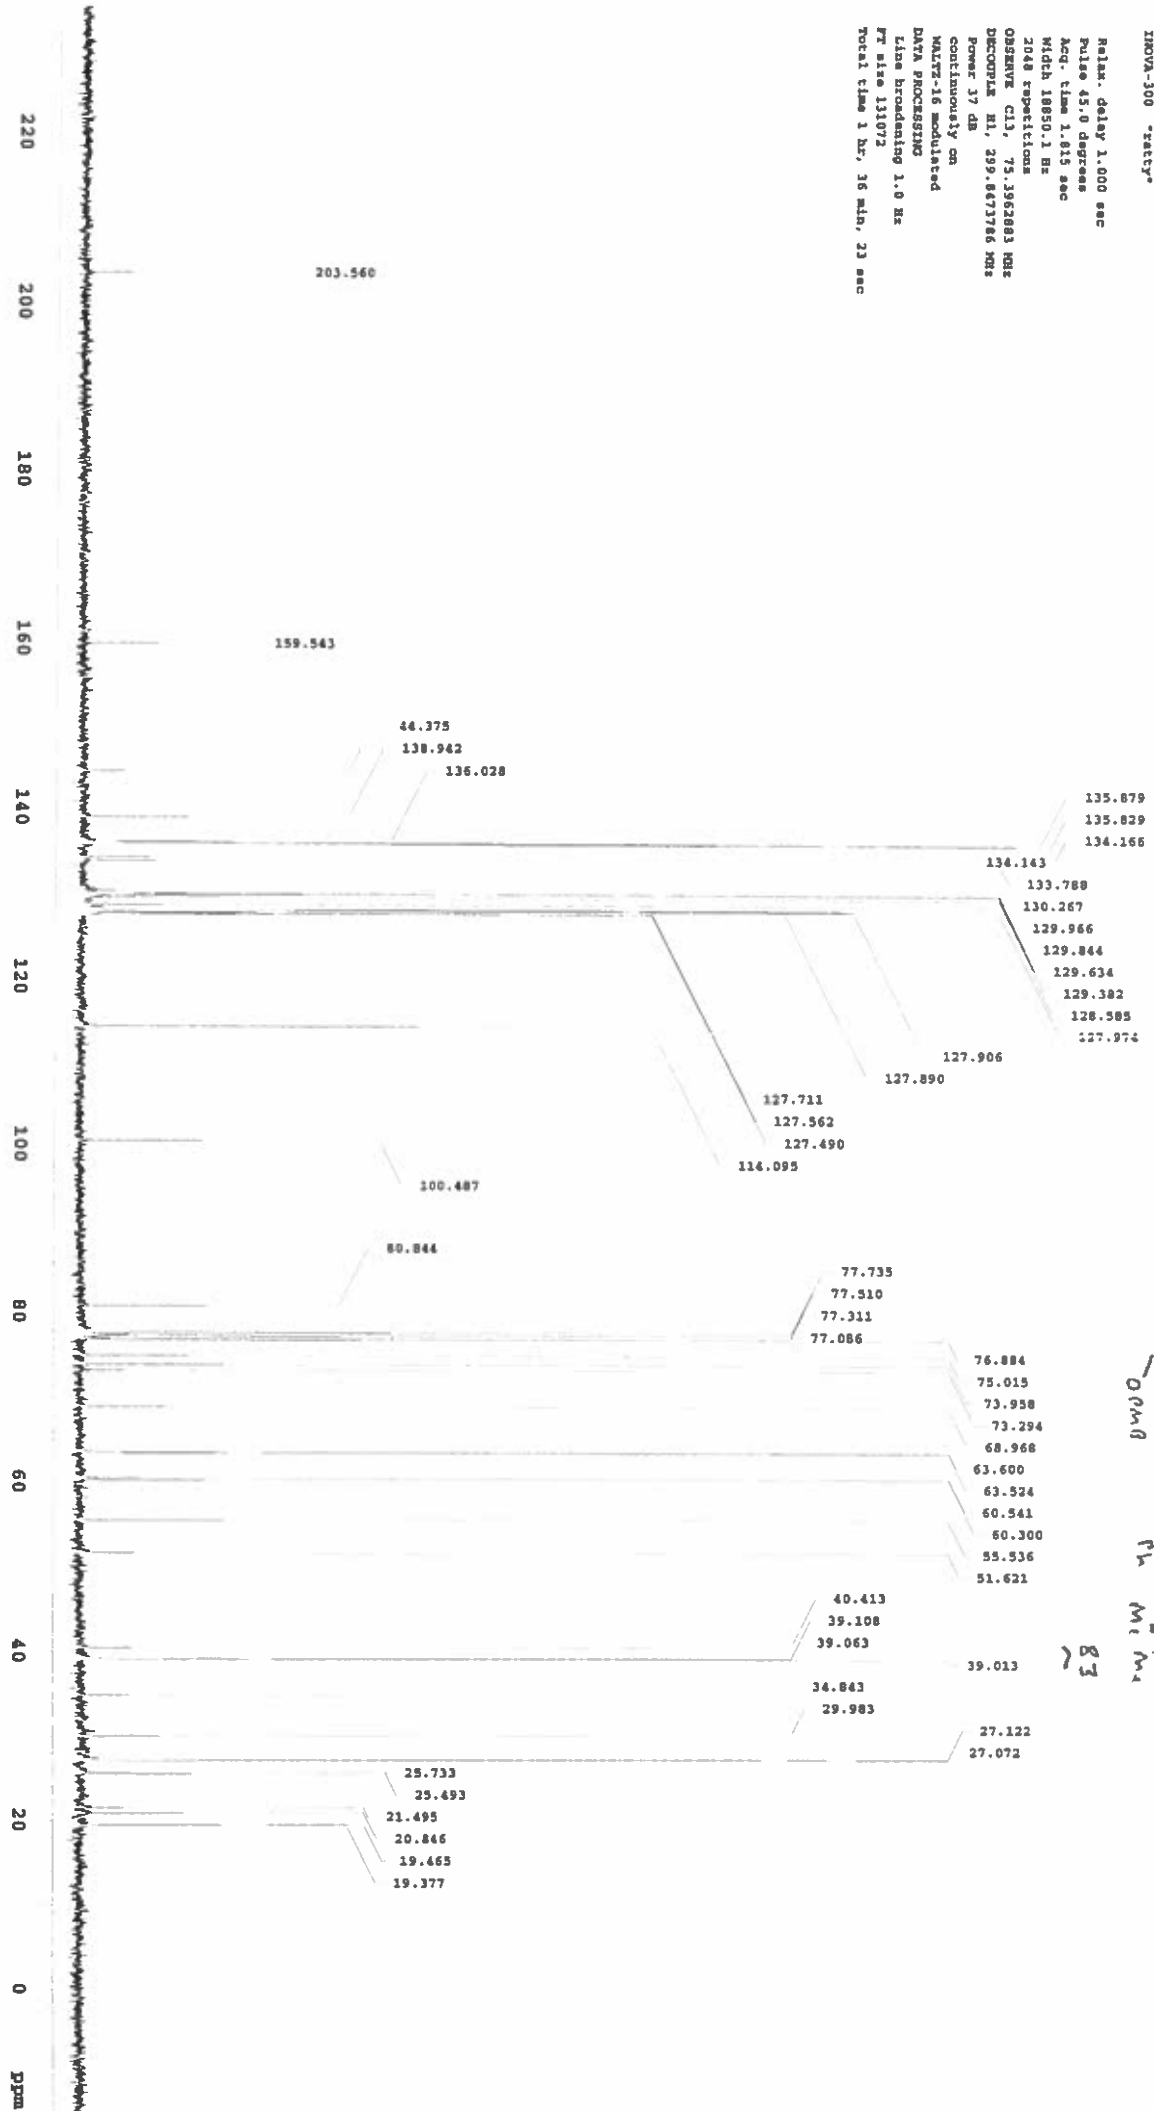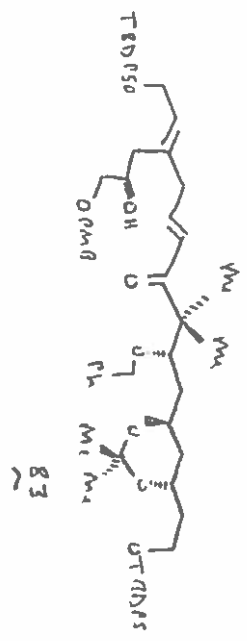

abl 215  
STANDARD IR OBSERVE

Automation directory: /data/rawdata/rep15  
File: 12301

Pulse Sequence: zgpg1  
Solvent: cdcl3  
Ambient temperature  
Sample #23  
File: 12301  
INOVA-300 "xatly"

Relax. delay: 1.000 sec  
Pulse: 45.0 degrees  
Acq. time: 3.744 sec  
Width: 4797.6 Hz  
32 repetitions  
OBSERVE: H1, 299.8458793 MHz  
DATA PROCESSING  
F2 size: 65536  
Total time: 2 min, 32 sec

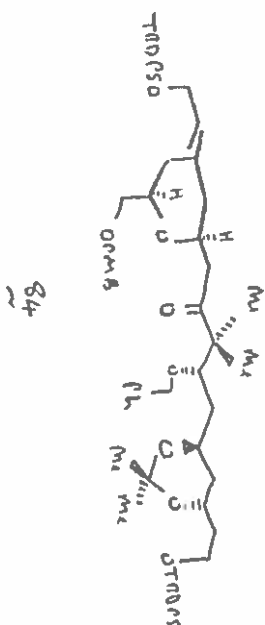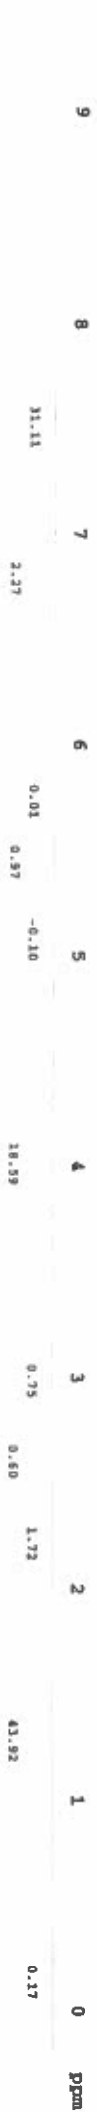

Automation directory: /data/nmrdata/Dec03  
File: 4402

Pulse Sequence: zgpg30  
Solvent: cdcl3  
Ambient temperature  
Sample 844  
File: 4402  
INOVA-300 "ratty"

Relax. delay 1.000 sec  
Pulse 45.0 degrees  
Acq. time 1.815 sec  
Width 18950.1 Hz  
128 repetitions  
OBSERVE C13, 75.362883 MHz  
DECOUPLE H1, 299.8873786 MHz  
Power 37 dB  
continuously on  
WALTZ-16 modulated  
DATA PROCESSING  
Line broadening 1.0 Hz  
PT size 131072  
Total time 12 min, 2 sec

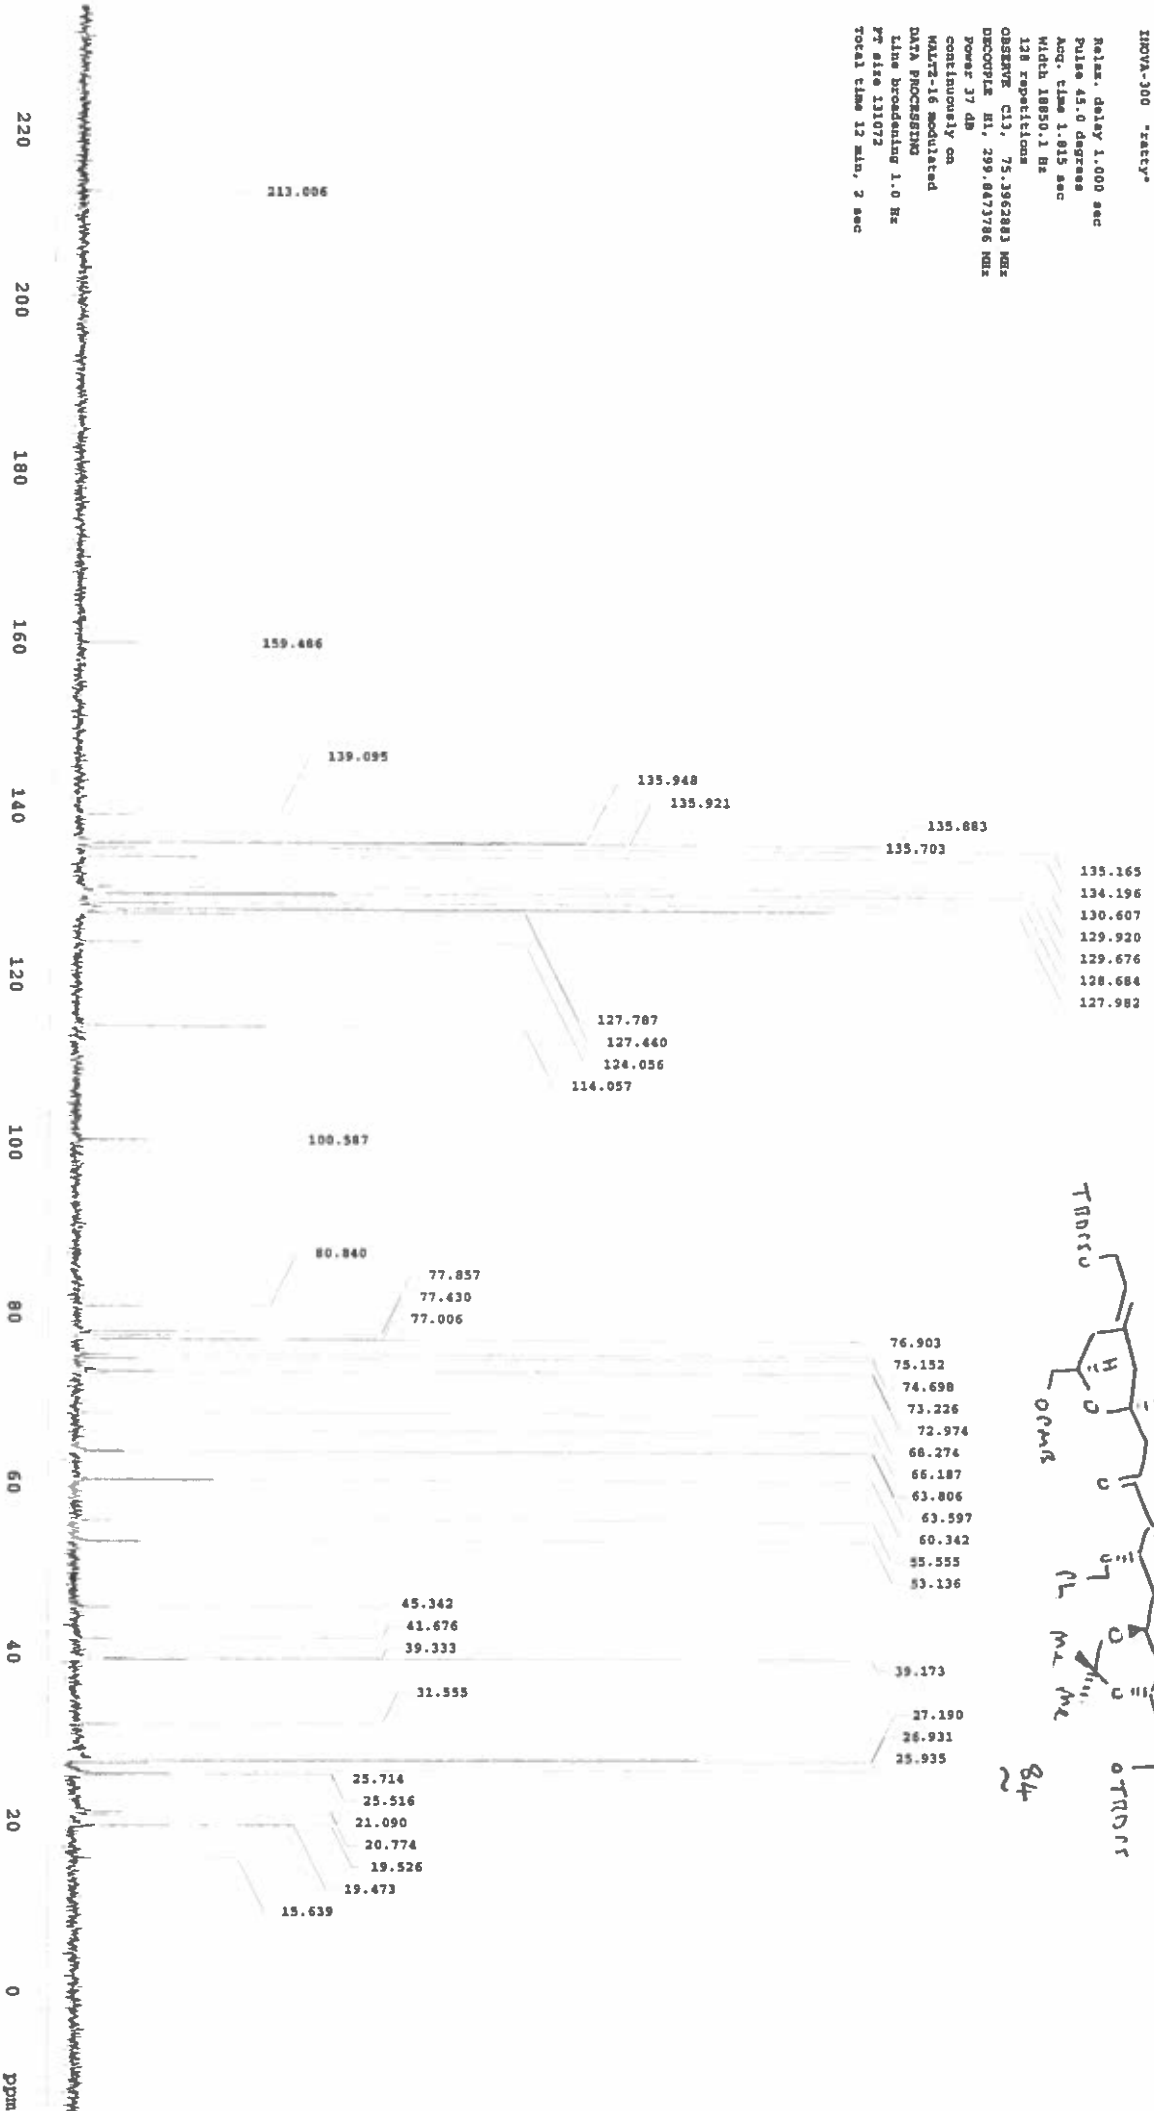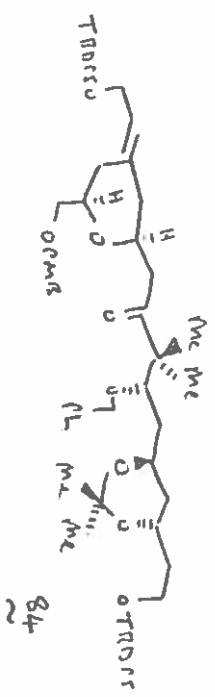

ml1 231/1 c032 (sample in benzene)  
STANDARD IR OBSERVE

Automation directory: /data/zmdata/Decio  
File: 1701

Pulse Sequence: a2pu1  
Solvent: C6D6  
Ambient temperature  
Sample #17  
File: 1701  
INOVA-300 "gpcy"

Relax. delay 1.000 sec  
Pulse 45.0 degrees  
Acq. time 3.744 sec  
Width 4797.6 Hz  
32 repetitions  
OBSERVE H1, 299.8459062 MHz  
DATA PROCESSING  
F2 also 65936  
Total time 2 min, 32 sec

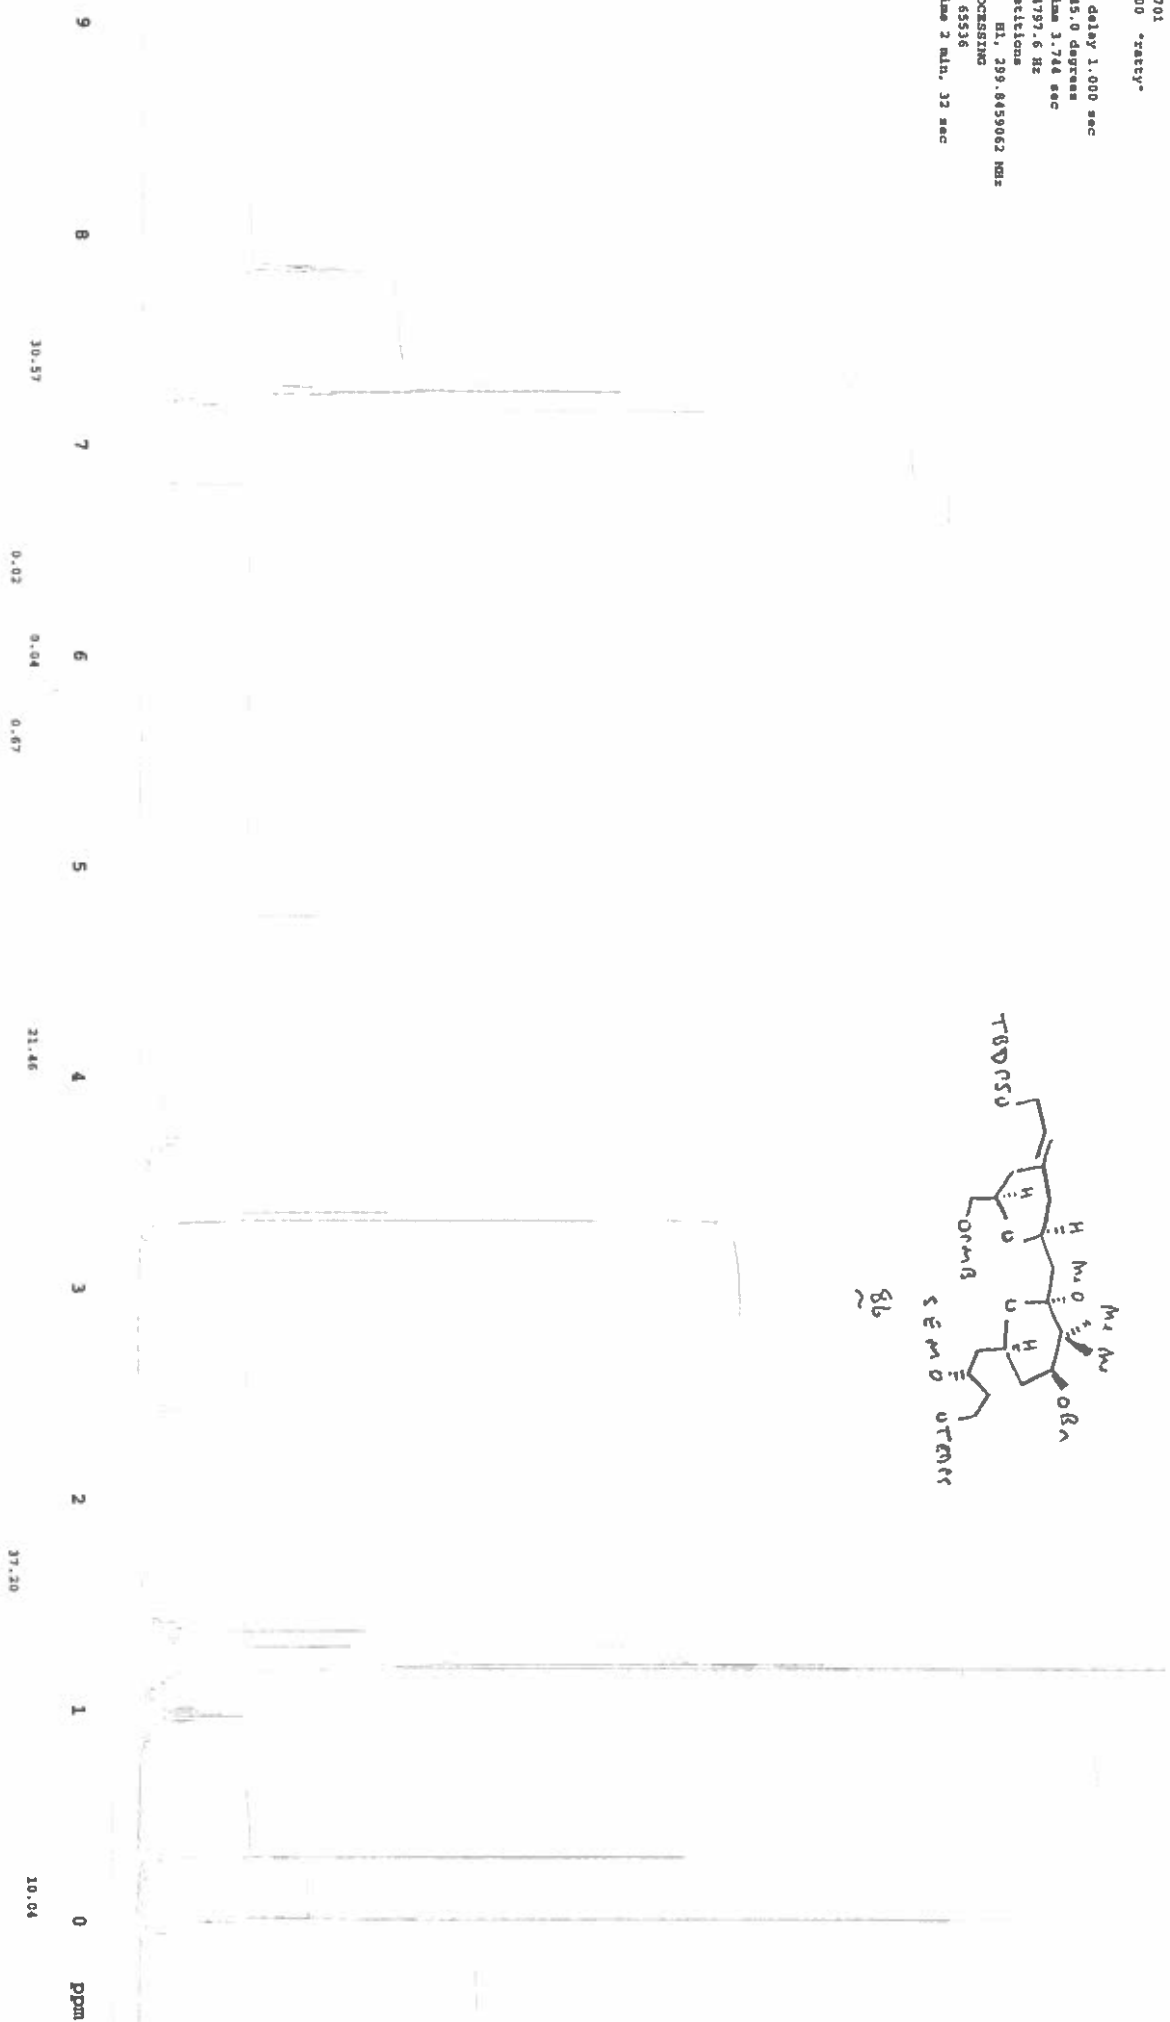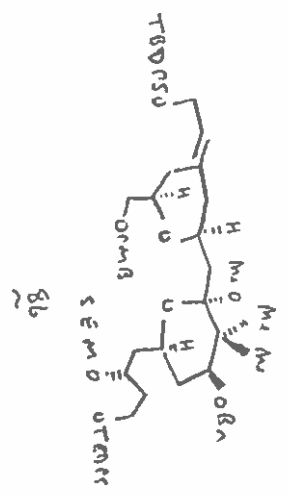



mb1 221/1 pure (benzene)  
13C OBSERVE

pad=2 run with flinds0 before acquisition

Solvent: CDCl3  
Ambient temperature  
File: 2502  
Date Dec 11 2003  
INOVA-300 \*acqids\*

PULSE PROGRAM  
Relax. delay 1.000 sec  
Pulse 45.0 degrees  
Acq. time 1.815 sec  
Width 18830.1 Hz  
2048 repetitions  
OBSERVE CH1, 75.362951 MHz  
DECOUPLE CH1, 299.8474056 MHz  
Power 37 dB  
contingently on  
WALTZ-16 modulated  
DATA PROCESSING  
Line broadening 1.0 Hz  
FT size 131072  
Total time 96 minutes

Vertical Scale = 1500.0

220 200 180 160 140 120 100 80 60 40 20 0 ppm

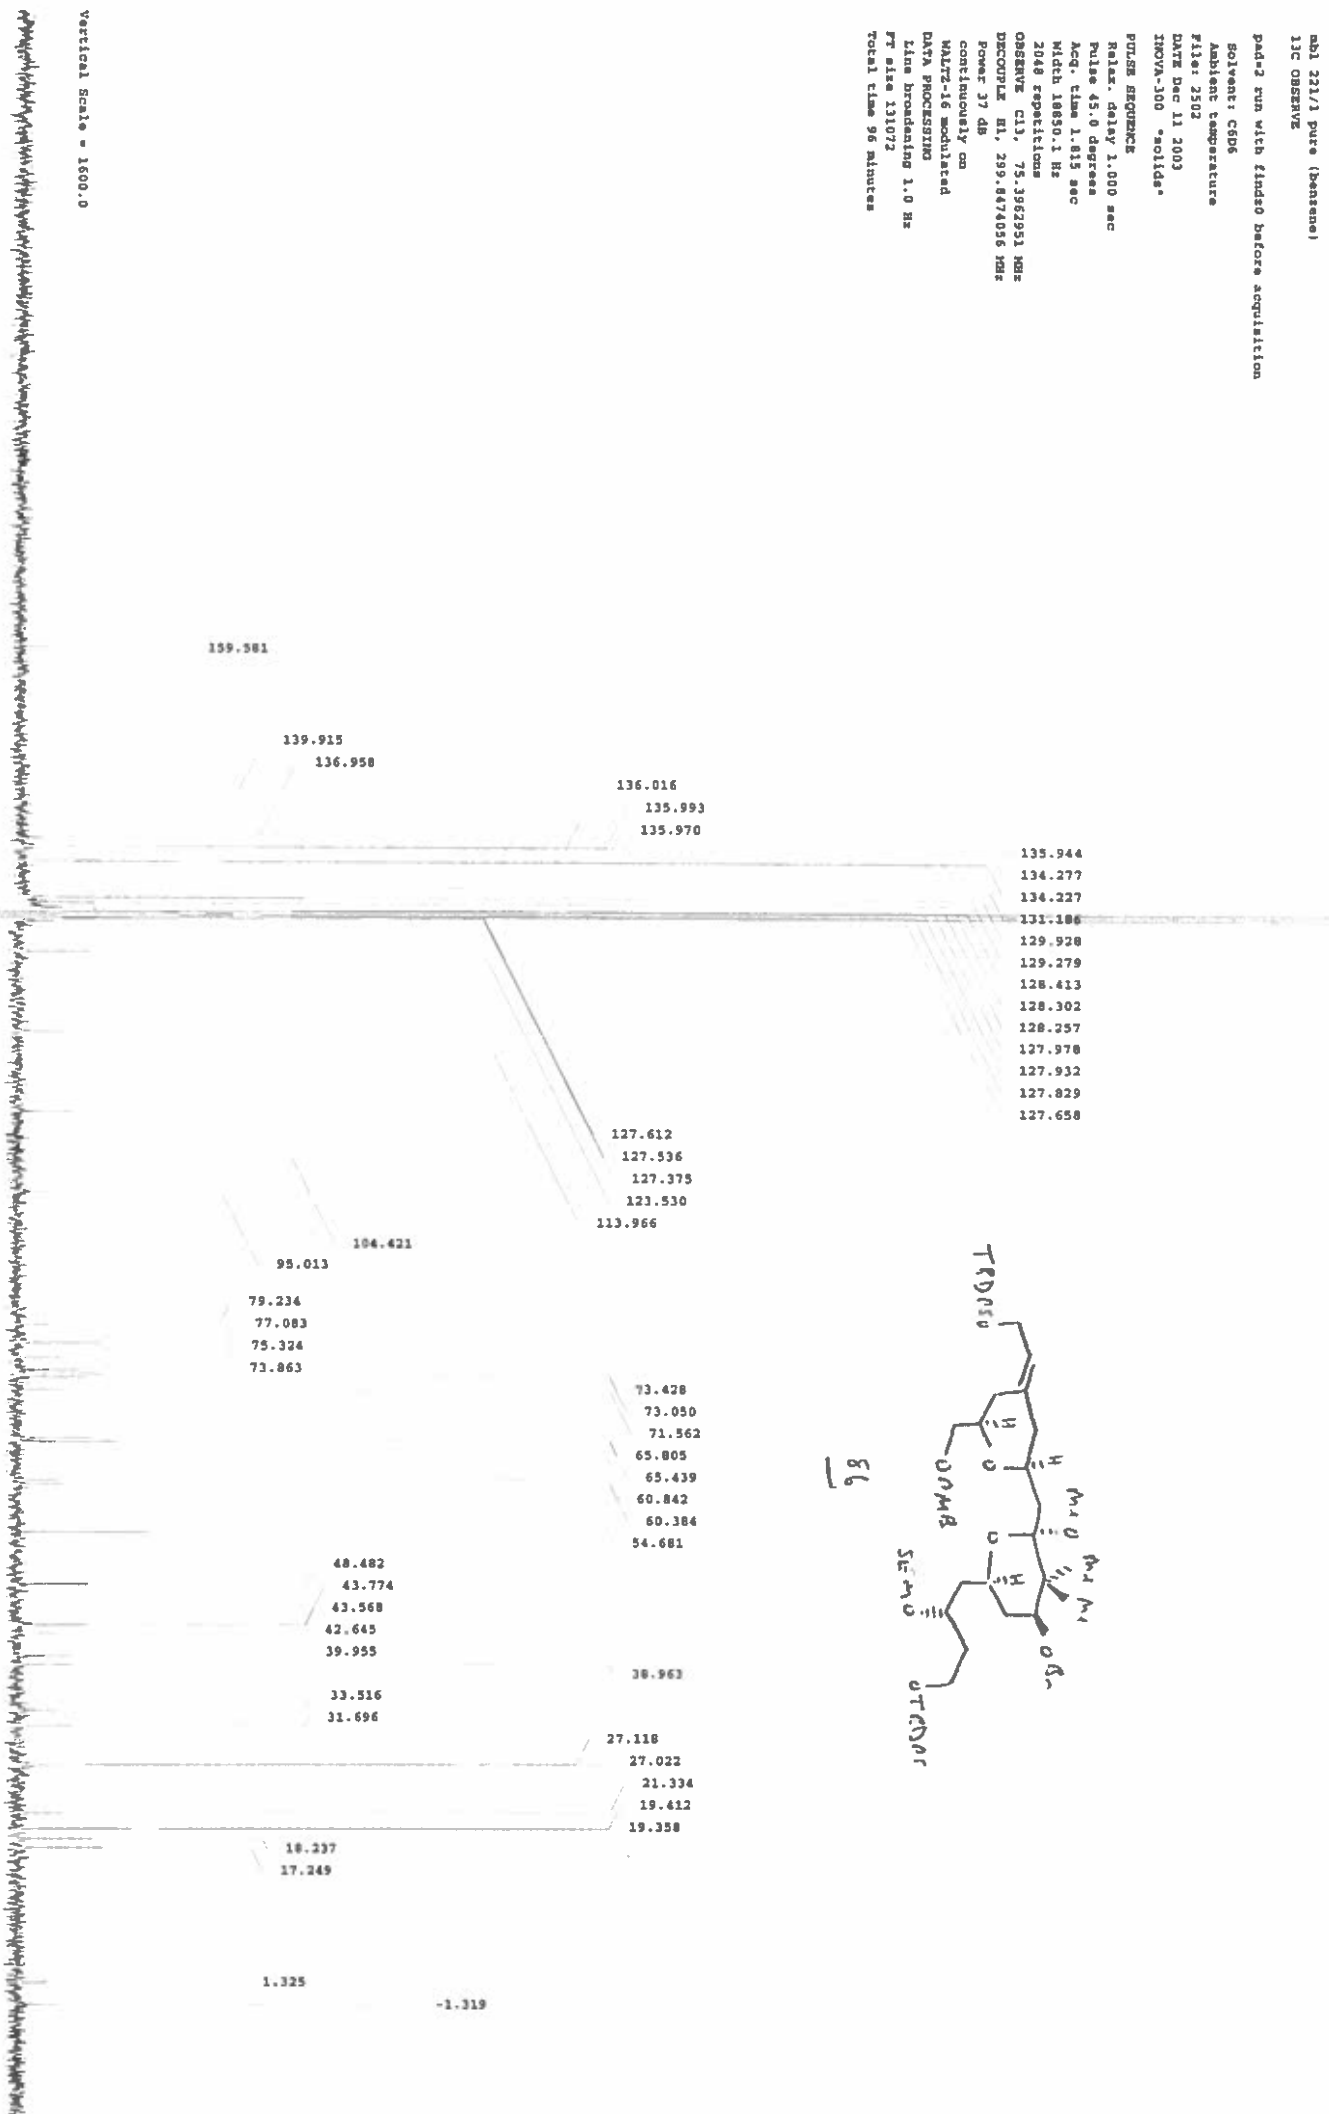

mb1 232/2.crd  
STANDARD IN OBSERVE

Automation directory: /data/nmrdata/Dec15  
File: 3601

Pulse Sequence: zgpg1  
Solvent: CD6  
Ambient temperature  
Sample #36  
File: 3601  
INOVA-300 "zetty"

Relax. delay 1.000 sec  
Pulse 45.0 degrees  
Acq. time 3.764 sec  
Width 4797.6 Hz  
32 repetitions  
OBSERVE H1, 299.8459062 MHz  
DATA PROCESSING  
F2 size 65536  
Total time 2 min, 32 sec

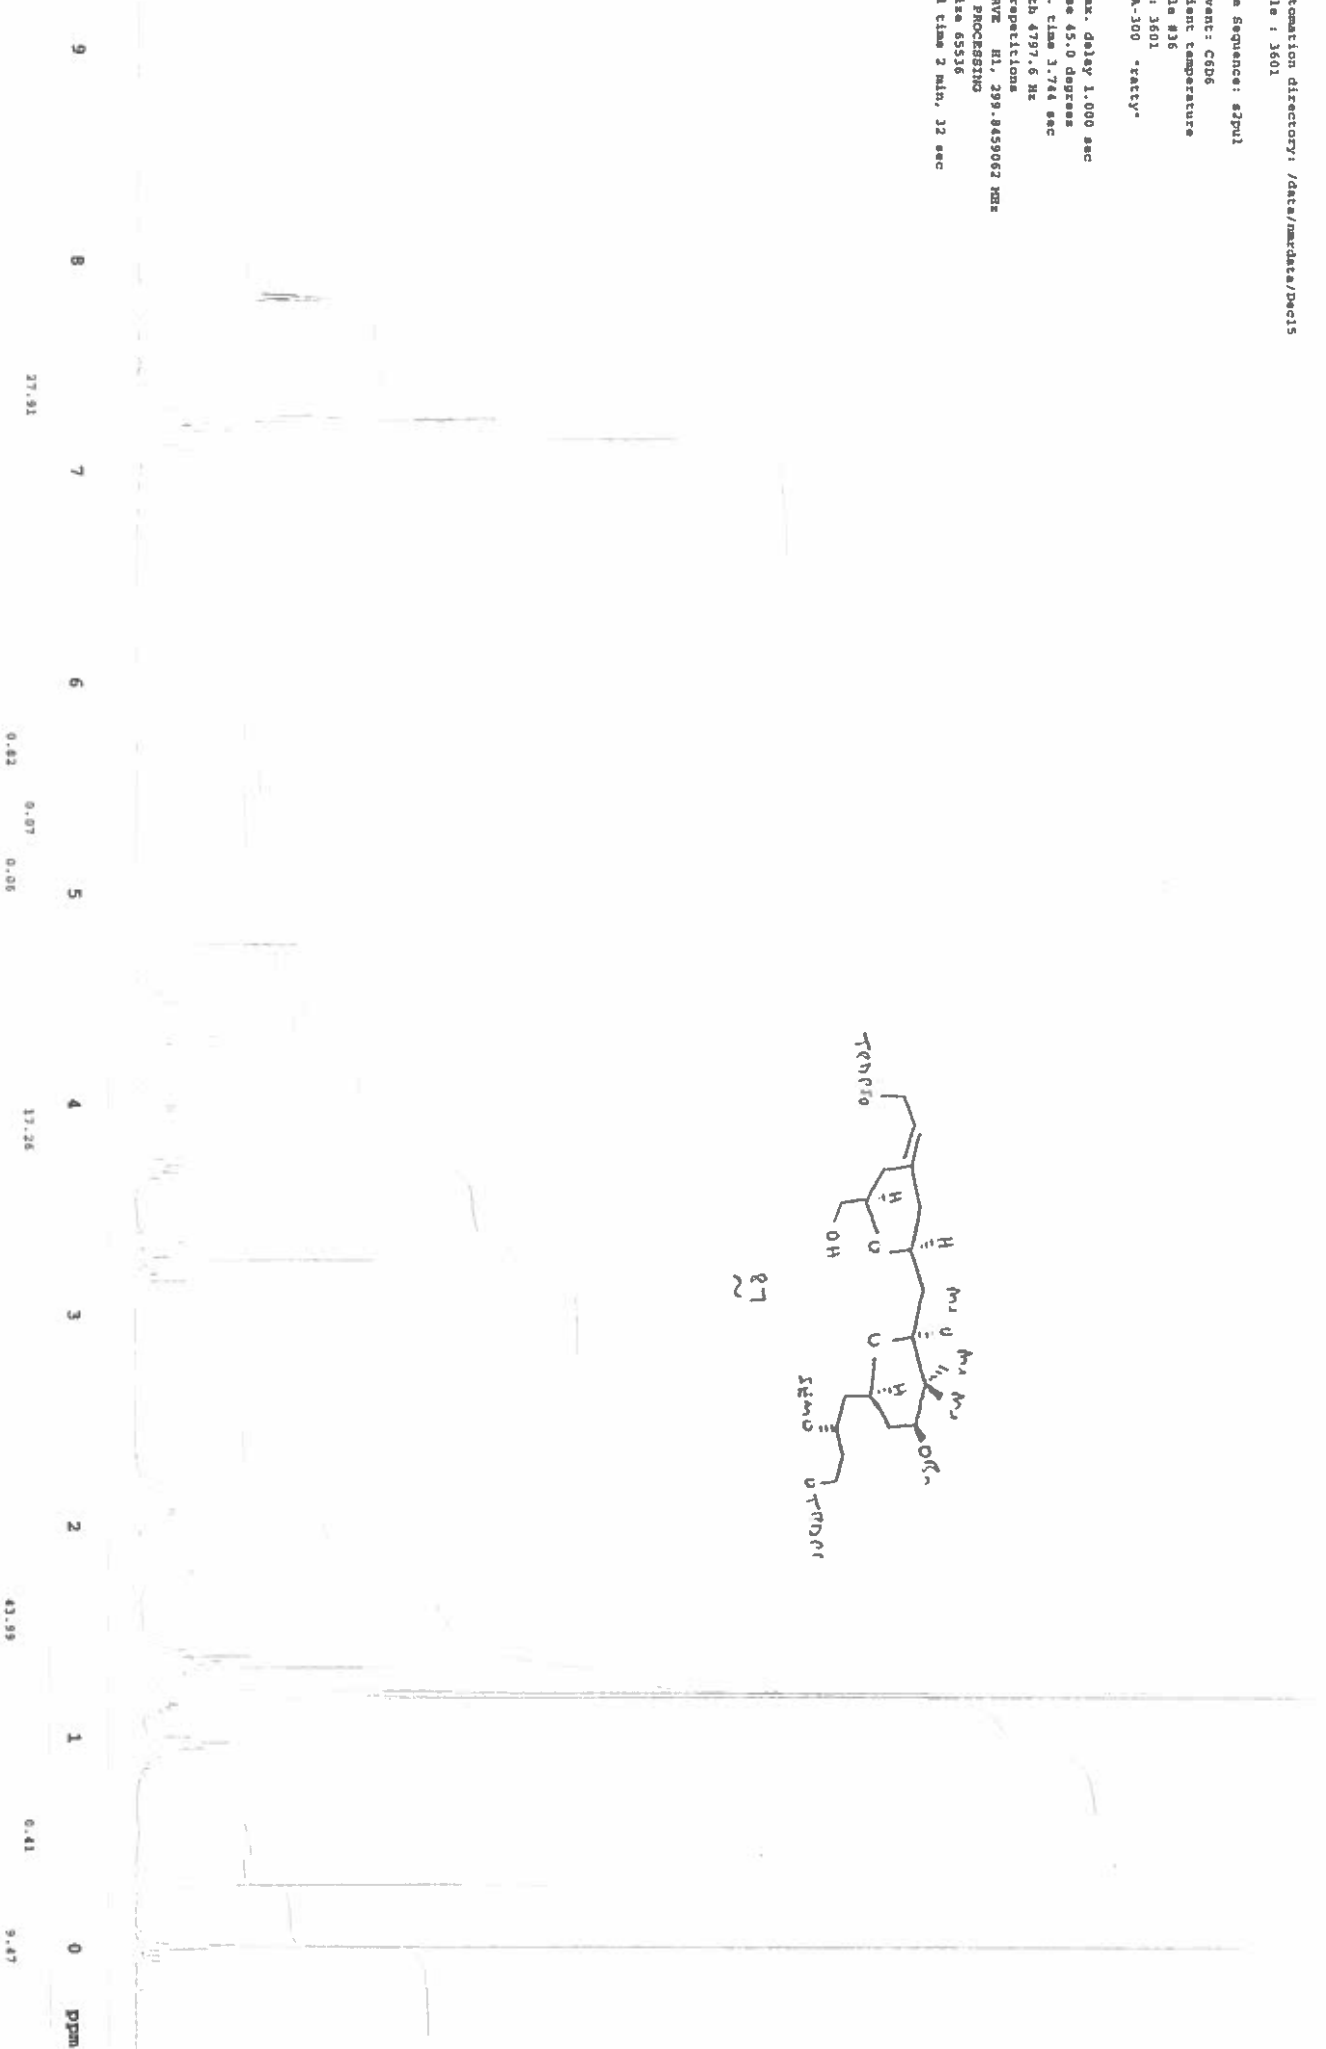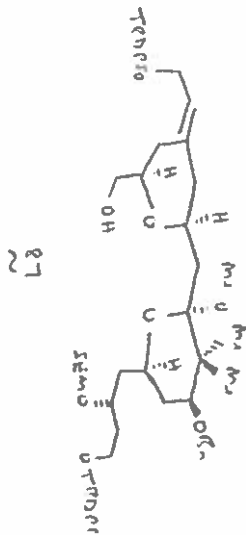

mbi 222/4 pulse  
13C OBSERVE

pad=2 run with f1ndio before acquisition  
Automation Directory: /data/rawdata/Decis  
File: 1303

Pulse Sequence: s2pui  
Solvent: C6D6  
Ambient Temperature  
Sample #13  
File: 1303  
INOVA-300 "ratty"

Relax. delay 1.000 sec  
Pulse 45.0 degrees  
Acq. time 1.815 sec  
Width 18950.1 Hz  
2048 repetitions  
OBSERVE C13, 75.362951 MHz  
DECOUPLE H1, 299.8474056 MHz  
Power 37 dB  
continuously on  
MAGY-16 modulated  
DATA PROCESSING  
Line Broadening 1.0 Hz  
F2 size 131072  
Total time 1 hr, 36 min, 23 sec

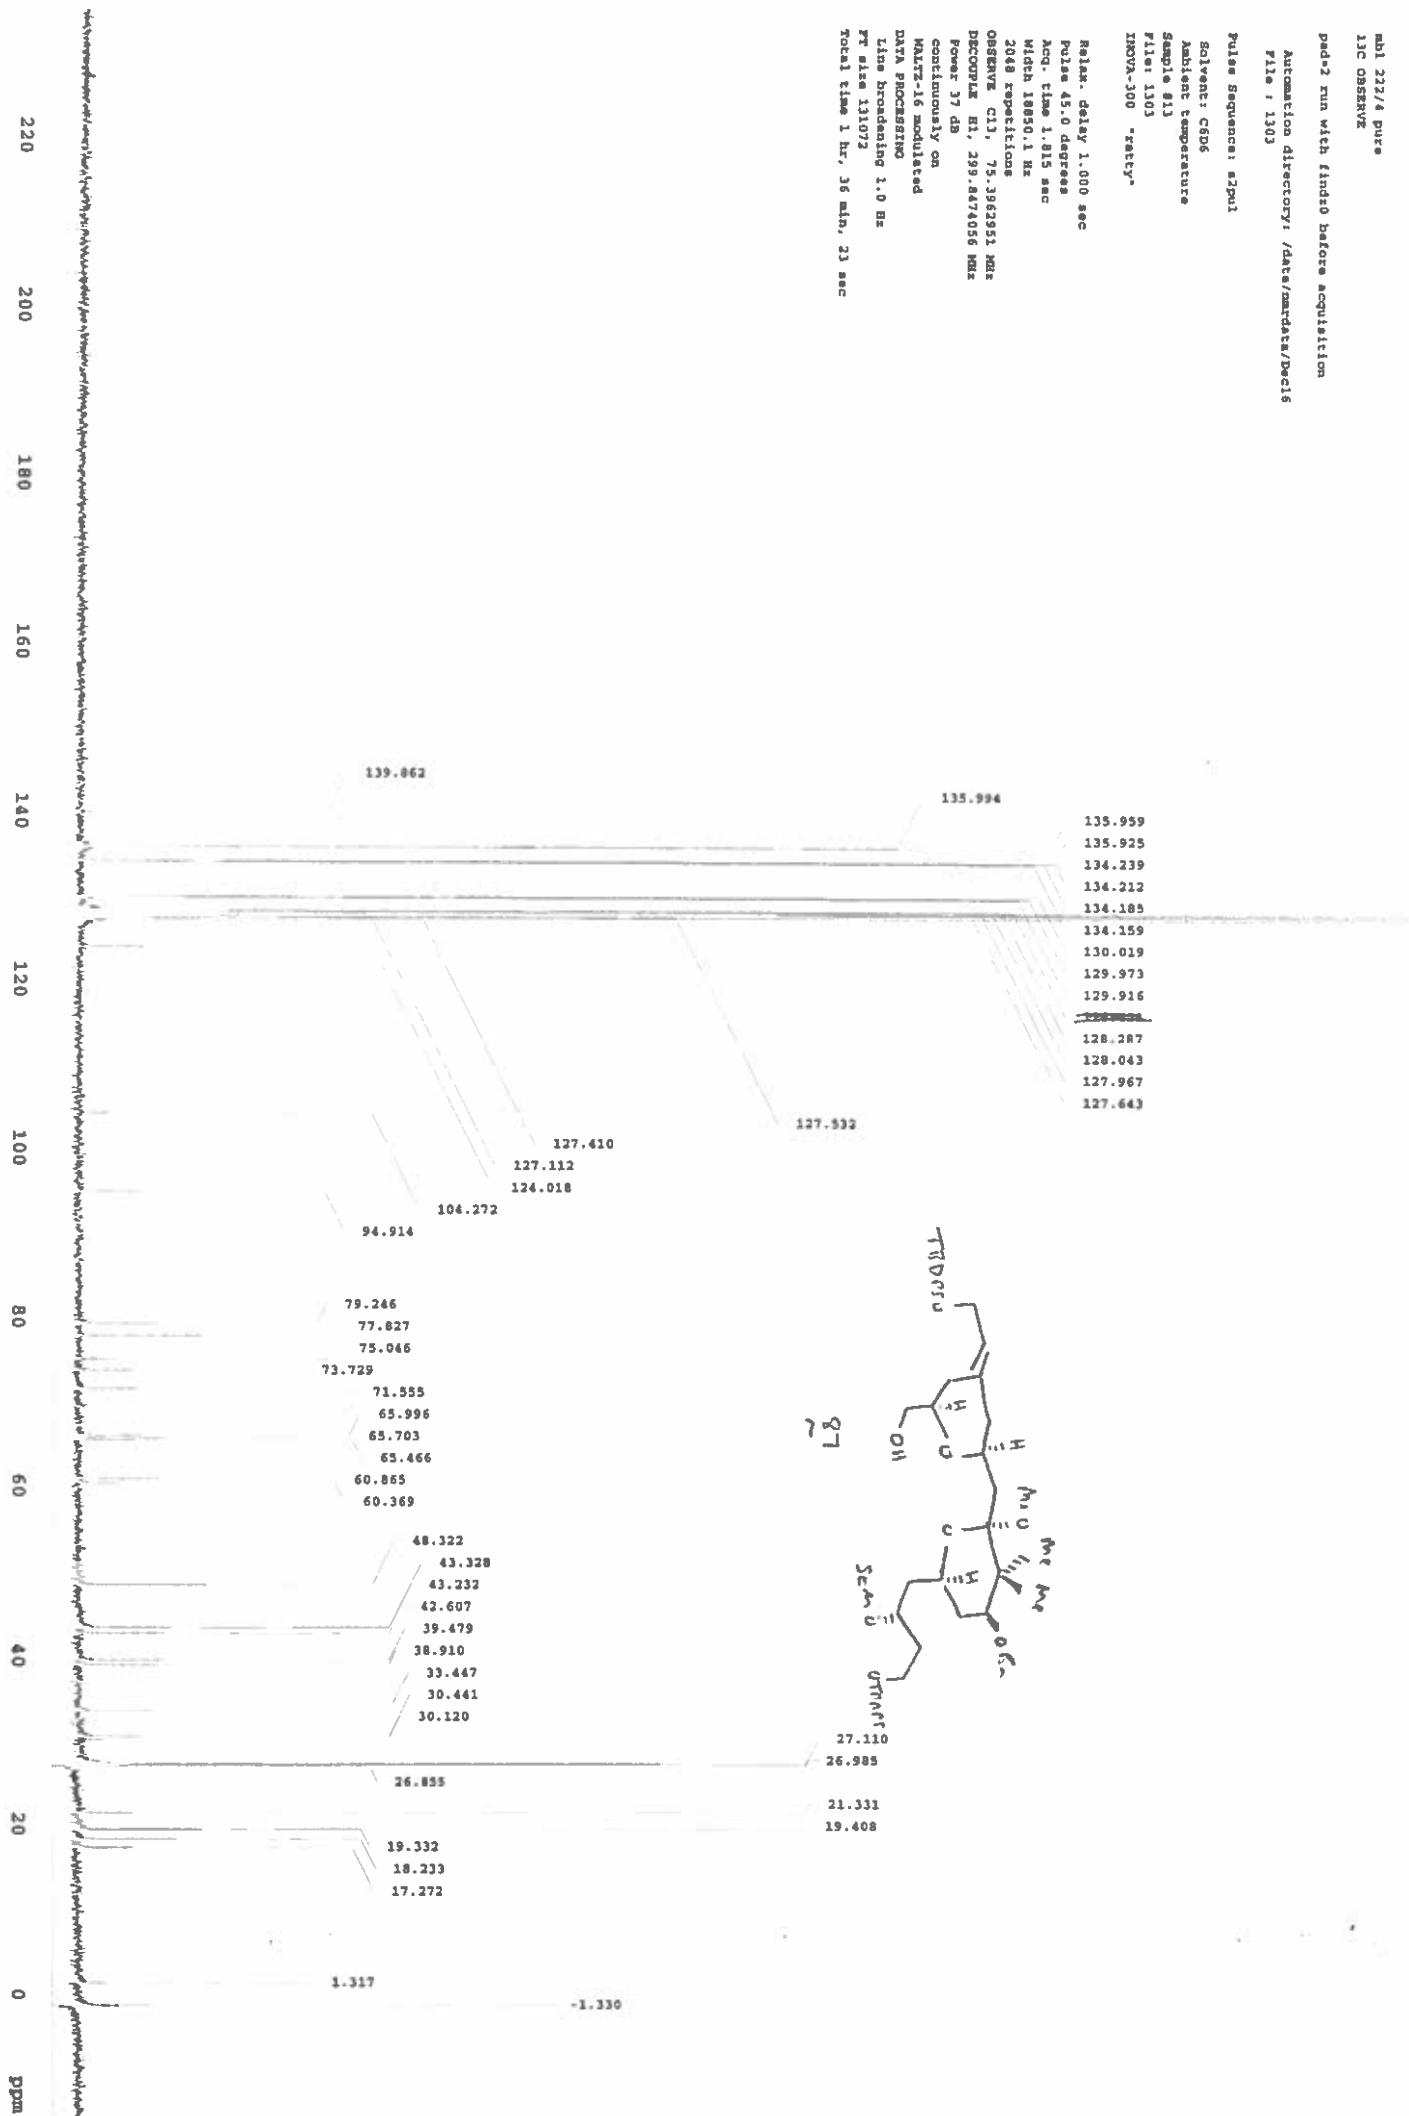

224/  
nbi 2387 pure  
STANDARD IN OBSERVE

FULL SPECTRUM

Automation directory: /data/rawdata/Doc16  
File: 1402  
Pulse Sequence: zgpu1

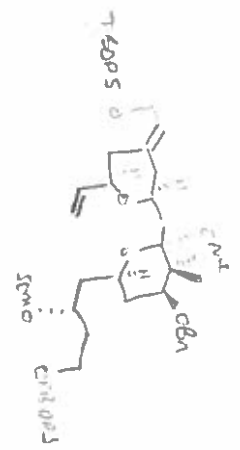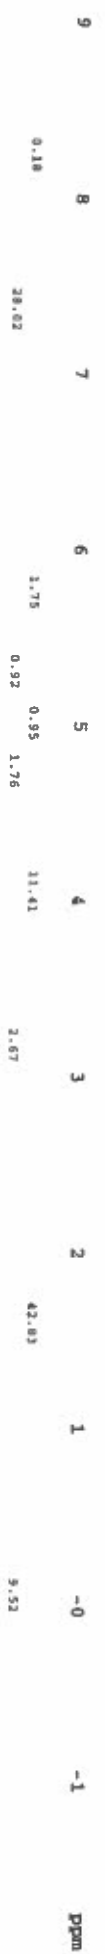

226/1  
 mbl 227/4 pure  
 STANDARD 38 OBSERVE

Automation directory: /data/nmrdata/Dec16  
 File: 1404

Pulse Sequence: zgpg1  
 Solvent: C6D6  
 Ambient temperature  
 Sample #14  
 File: 1404  
 INOVA-100 "ratty"

Relax. delay 1.000 sec  
 Pulse 45.0 degrees  
 Acq. time 1.815 sec  
 Width 18950.1 Hz  
 2048 repetitions  
 OBSERVE C13, 75.362951 MHz  
 DECOUPLE H1, 299.8474056 MHz  
 Power 37 dB  
 continuously on  
 MALTZ-16 modulated  
 DATA PROCESSING  
 Line broadening 1.0 Hz  
 F2 size 131072  
 Total time 1 hr, 36 min, 23 sec

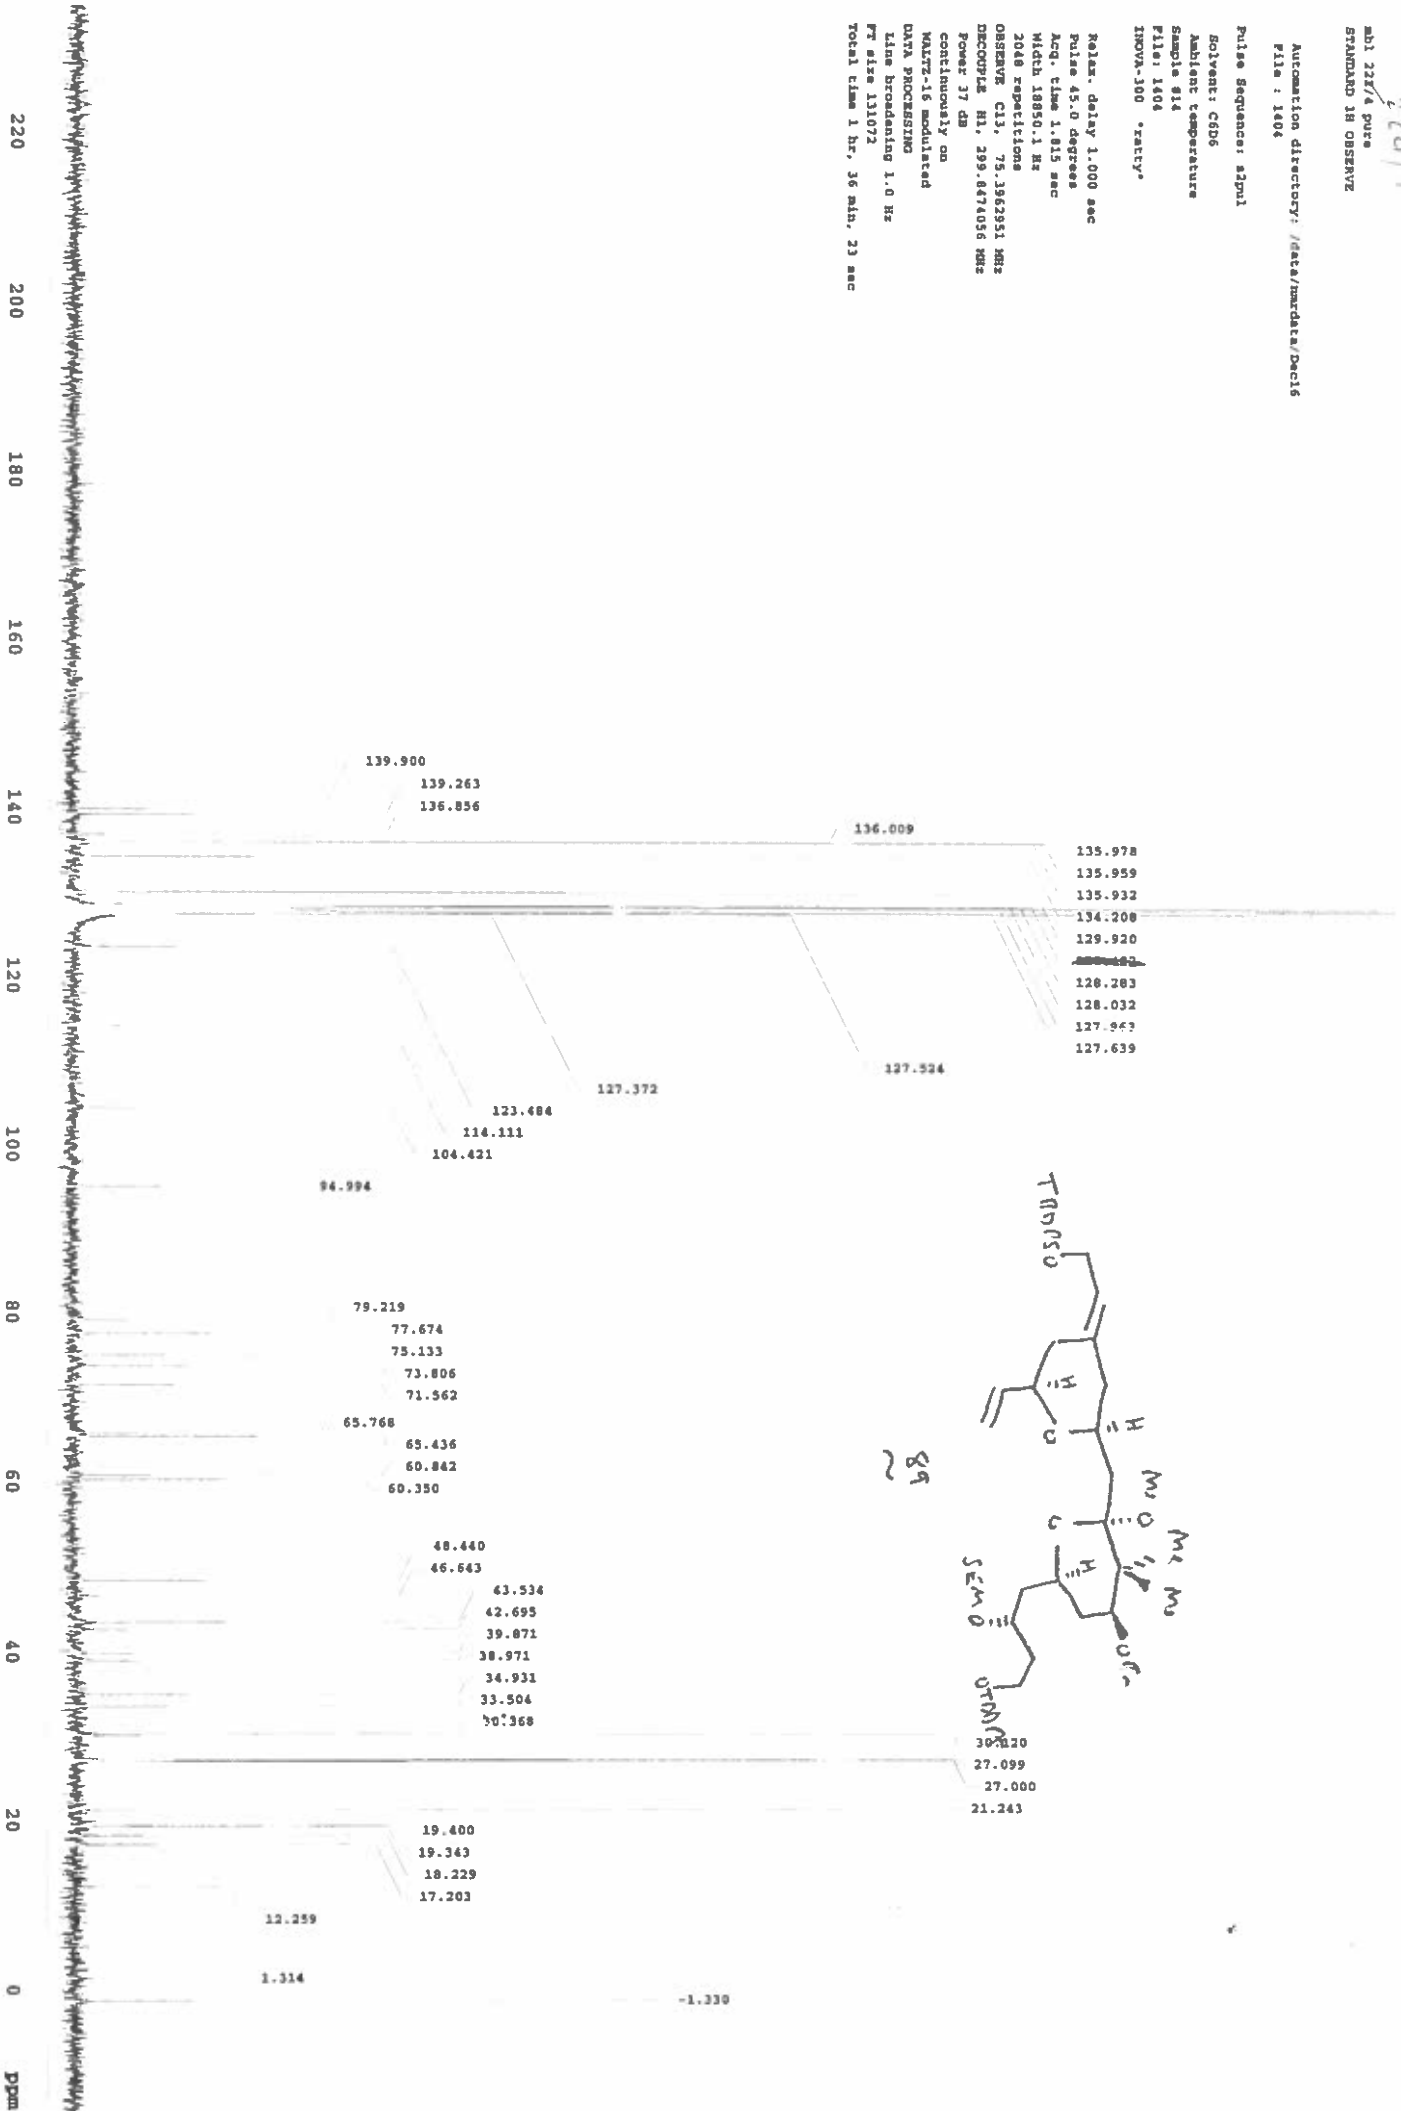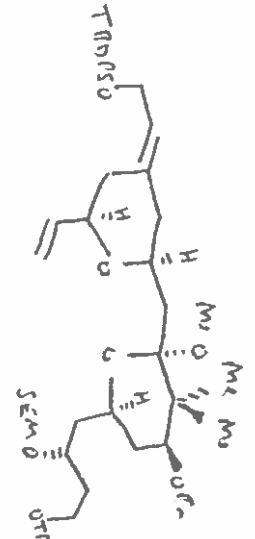

H115  
STANDARD IN OBSERVE

Automation directory: /data/merdetw/2un15  
File: 0202

Pulse Sequence: zgpg1  
Solvent: C6D6  
DATE: Jun 15 2004  
Sample #: 2  
File: 0202  
INOVA-300 "Trityl"

Relax. delay: 1.000 sec  
Pulse: 45.0 degrees  
Acq. time: 3.744 sec  
Width: 4797.6 Hz  
32 repetitions  
OBSERVE: H1, 299.8459083 MHz  
DATA PROCESSING  
F2 size: 65536  
Total time: 2 min, 32 sec

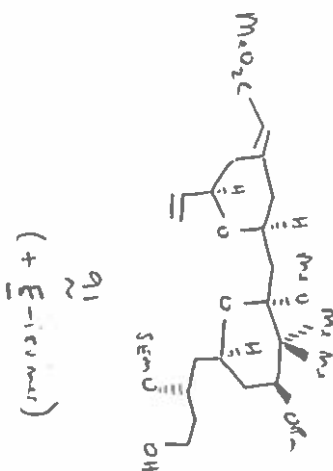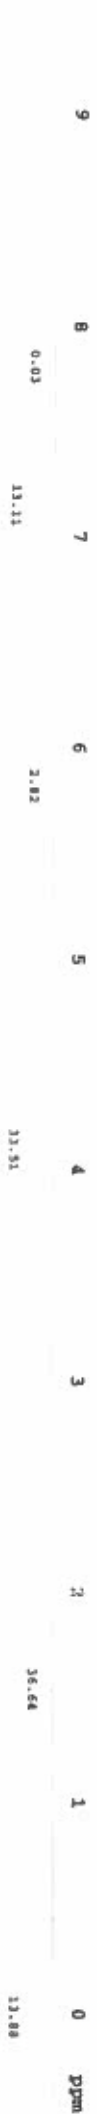

H115  
13C OBSERVE

pad-2 run with findro before acquisition

Automation directory: /data/mwdata/2016  
File: 1801

Pulse Sequence: s2pul1

Solvent: CDCl3  
DATE: Jun 16 2004  
Sample #18  
File: 1801  
INOVA-300 "gatty"

Relax. delay: 1.000 sec  
Pulse: 45.0 degrees  
Acq. time: 1.815 sec  
Width: 18850.1 Hz  
256 repetitions  
OBSERVE: C13, 75.3962951 MHz  
DECOUPLE: H1, 299.8474056 MHz  
Power: 37 dB  
continuously on  
WALTZ-16 modulated  
DATA PROCESSING  
Line broadening: 1.0 Hz  
PT: size 131072  
Total time: 12 min, 2 sec

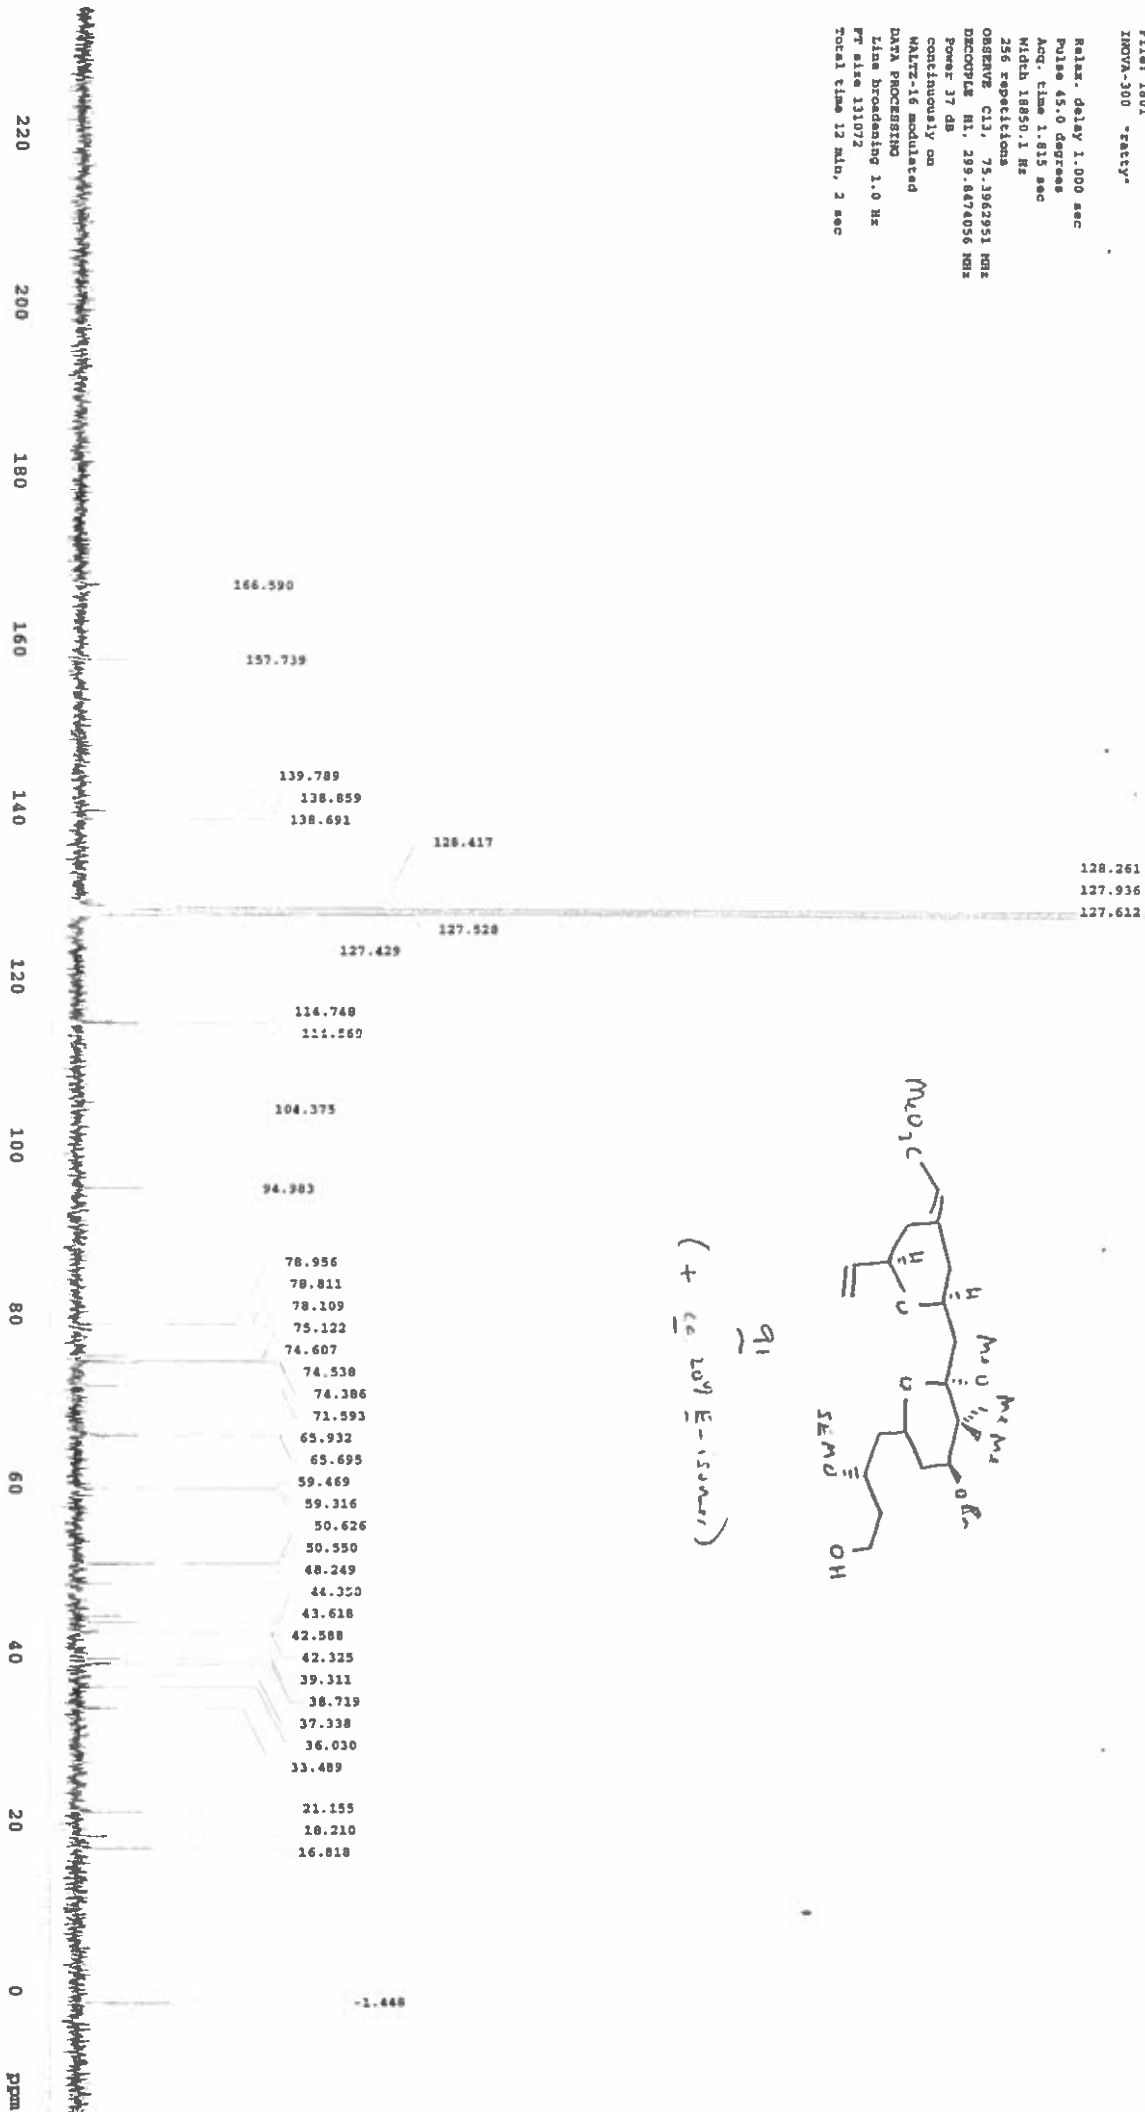

Automation directory: /data/nmr-data/Oct27  
File: 1902

Pulse Sequence: zgpg30

Solvent: cdcl3

DATE Oct 27 2004

Sample 819

File: 1902

HMVA-100 "rctty"

Relax. delay 1.000 sec

Pulse 45.0 degrees

Acq. time 3.764 sec

Width 4797.6 Hz

16 repetitions

OBSERVE: H1, 299.8458792 MHz

DATA PROCESSING

F2 size 65536

Total time 1 min, 16 sec

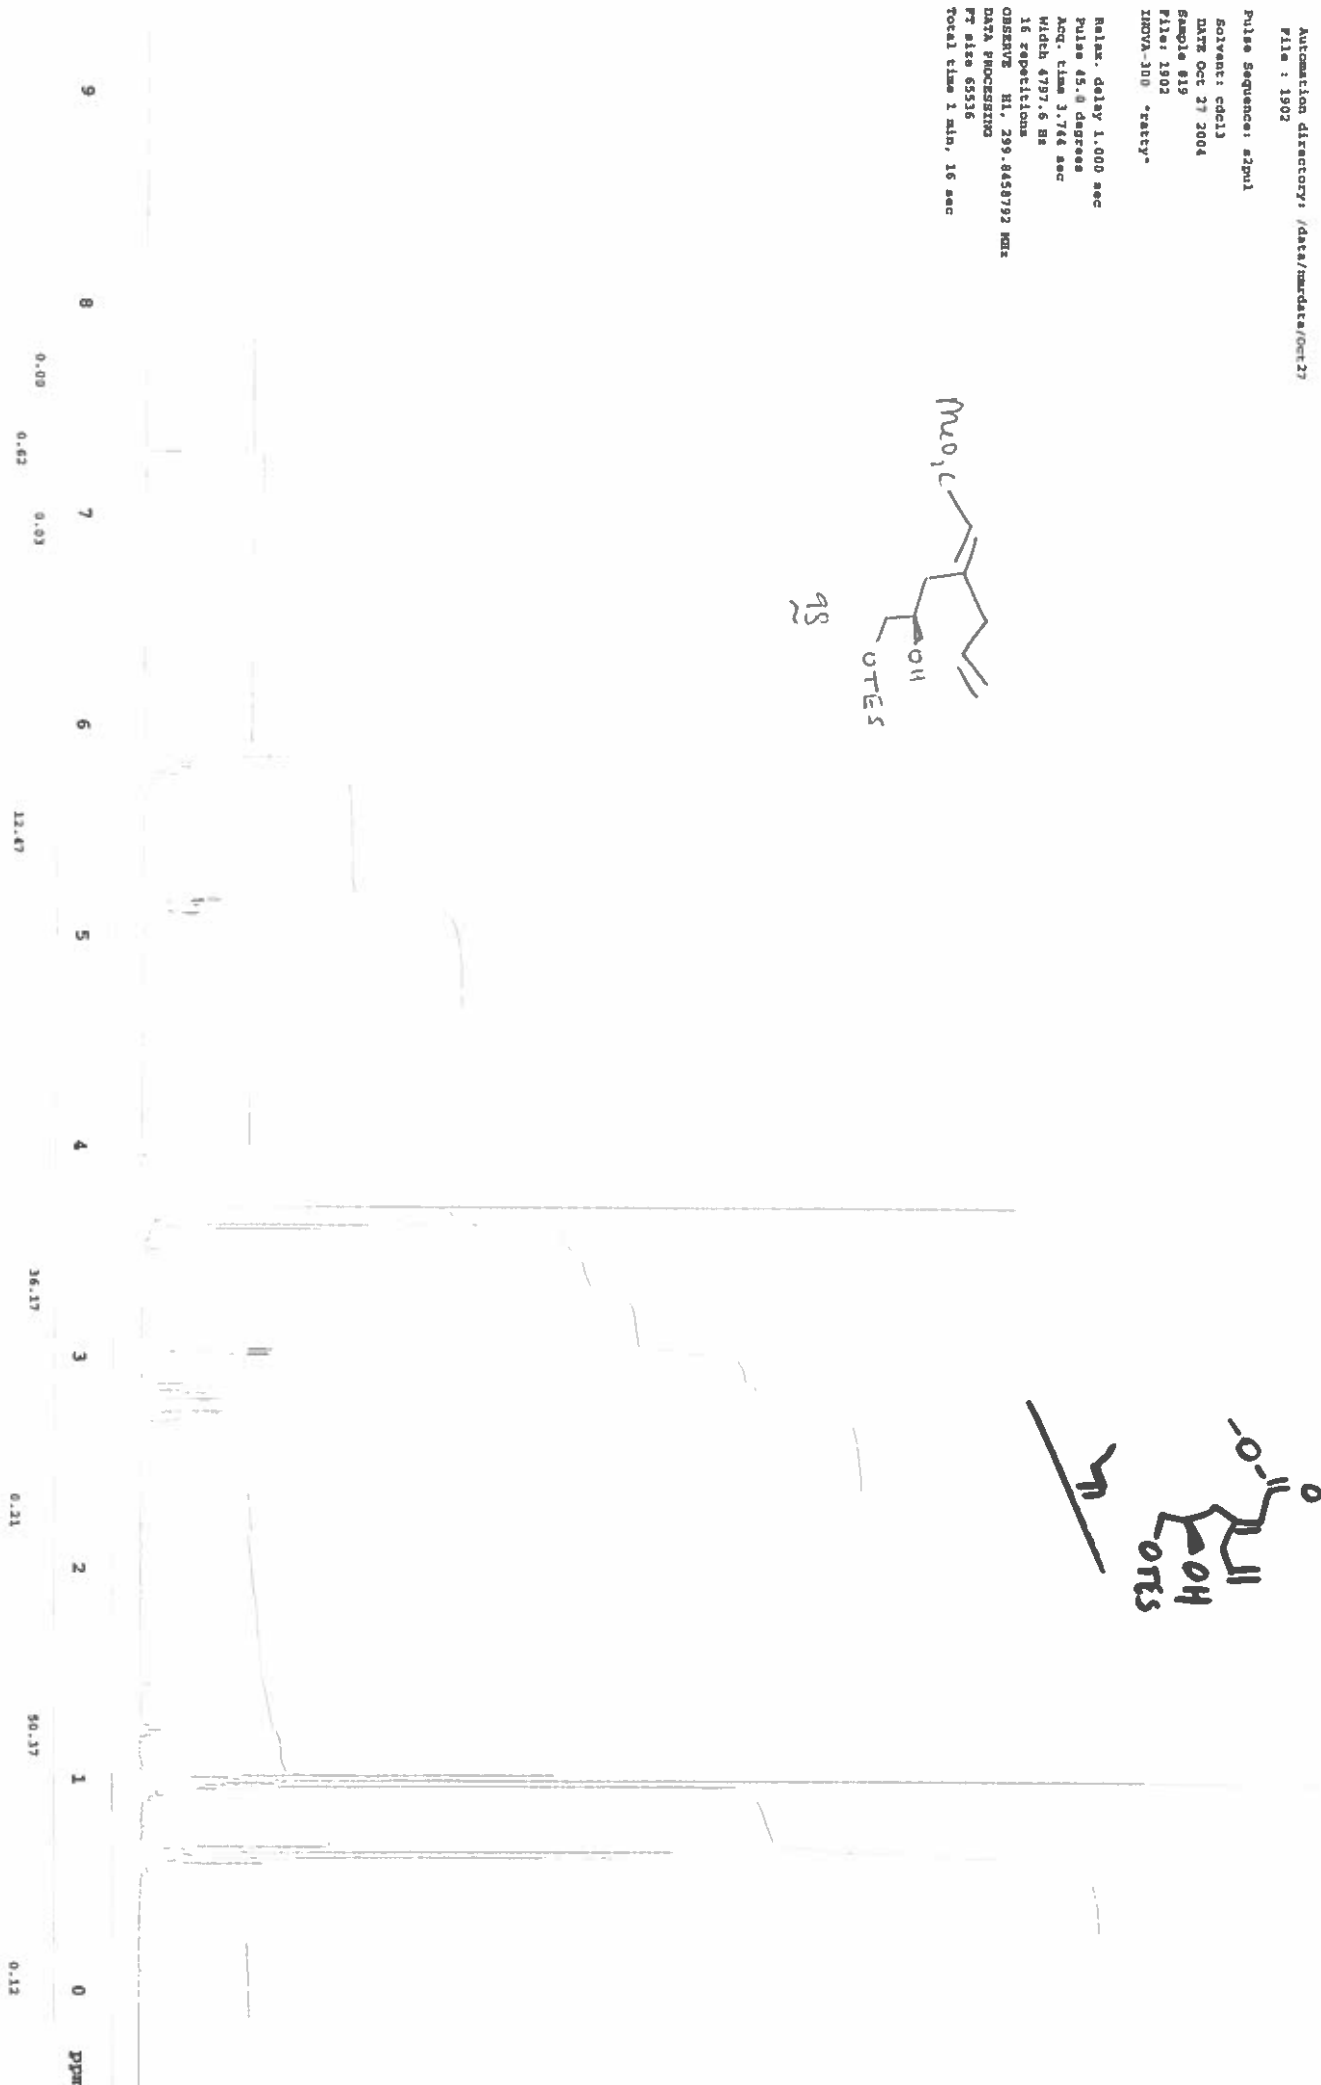



Automation directory: /data/rawdata/Oct27  
File: 1903

Pulse Sequence: zgpg1  
Solvent: cdcl3  
DATE Oct 27 2004  
Sample #19  
File: 1903  
INOVA-300 "rctly"

Relax. delay 1.000 sec  
Pulse 45.0 degrees  
Acq. time 1.615 sec  
Width 18850.1 Hz  
128 repetitions  
OBSERVE C13, 75.2952883 MHz  
DECOUPLE H1, 299.9473786 MHz  
Power 37 dB  
continuously on  
WALTZ-16 modulated  
DATA PROCESSING  
Line broadening 1.0 Hz  
SF size 131072  
Total time 12 min, 2 sec

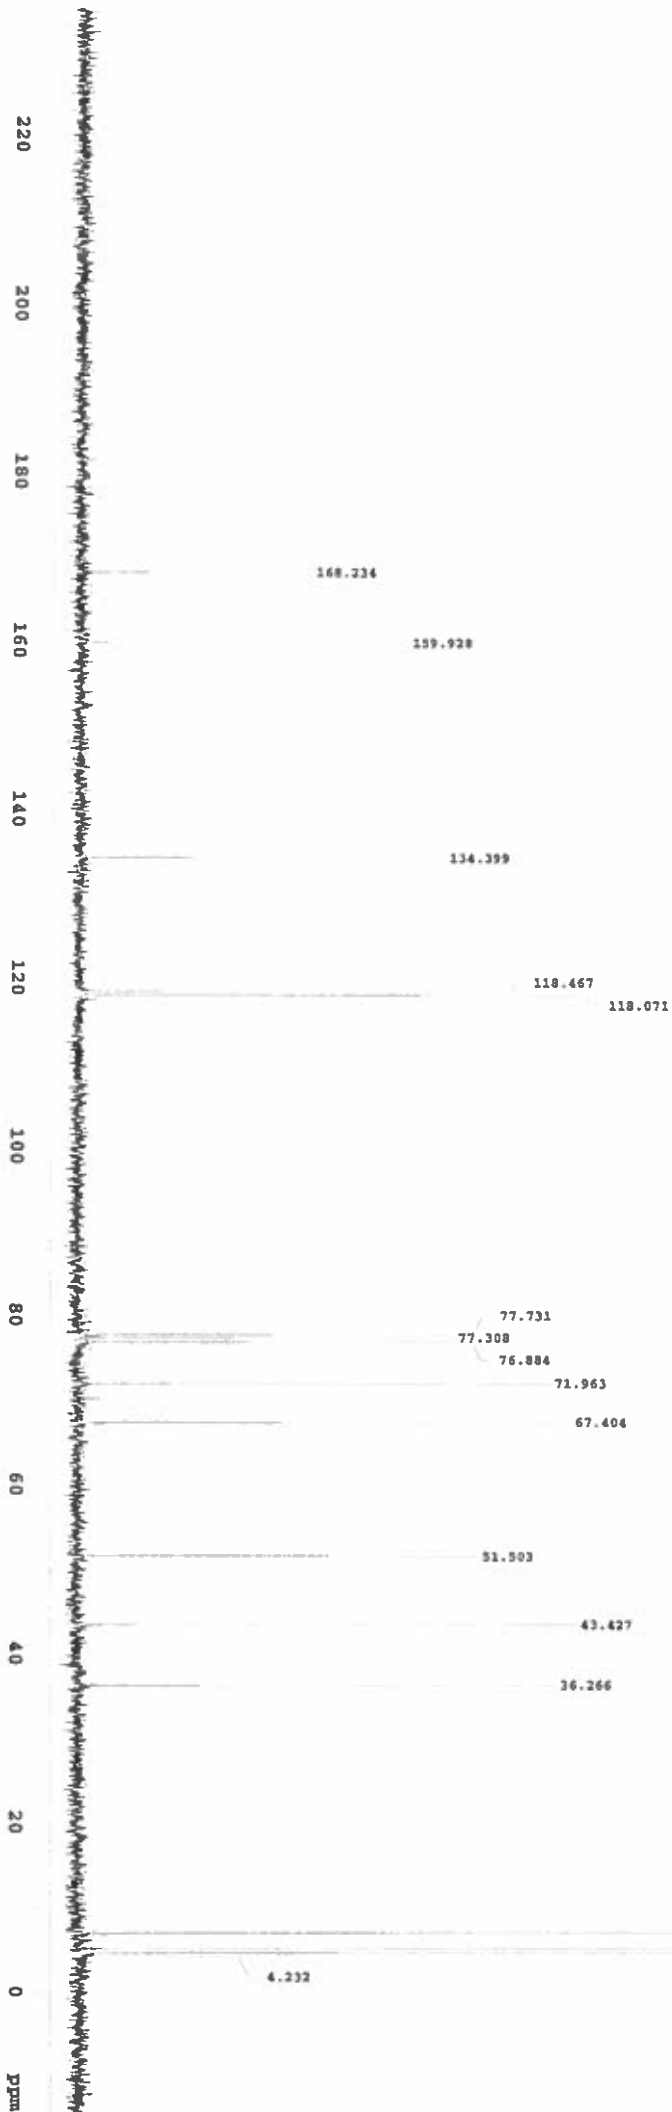

dlol  
STANDARD IN OBSERVE

R042

Automation directory: /data/sample/Oct01  
File: 0501

Pulse Sequence: zgpg30  
Solvent: cdcl3  
DATE Oct 1 2004  
Sample 85  
File: 0501  
INNOVA-300 "zrcty"

Relax. delay 1.000 sec  
Pulse 45.0 degrees  
Acq. time 3.744 sec  
Width 4797.6 Hz  
12 repetitions  
OBSERVE H1, 399.8480933 MHz  
DATA PROCESSING  
PT size 65536  
Total time 2 min, 33 sec

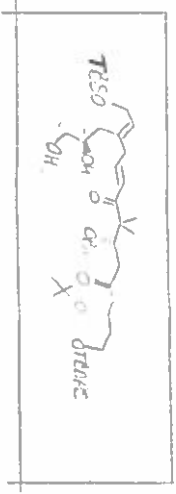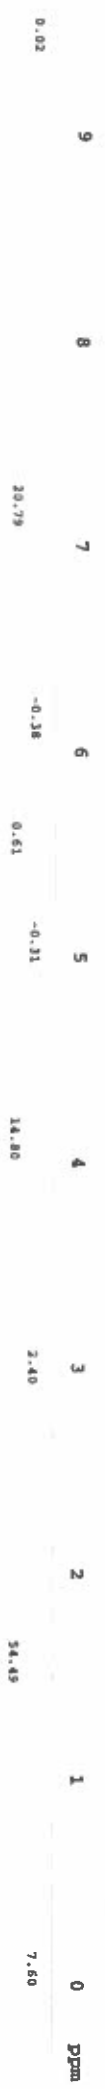

d101  
STANDARD IN OBSERVE

R042

Automation directory: /data/rawdata/Dct01  
File: 0502

Pulse Sequence: zgpg1  
Solvent: cdcl3  
DATE OC: 1 2004  
Sample #8  
File: 0502  
INOVA-300 "recy"

Relax. delay 1.000 sec  
Pulse 45.0 degrees  
Acq. time 1.915 sec  
Width 18950.1 Hz  
256 repetitions  
OBSERVE C13, 75.3962883 MHz  
DECOUPLE H1, 299.8473786 MHz  
Power 37 dB  
continuously on  
WALTZ-16 modulated  
DATA PROCESSING  
Line broadening 1.0 Hz  
F2 size 131072  
Total time 11 min, 2 sec

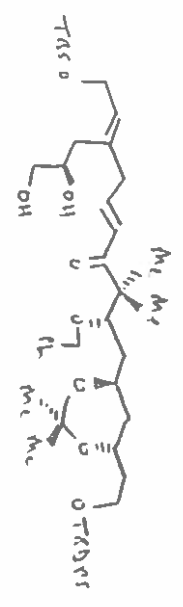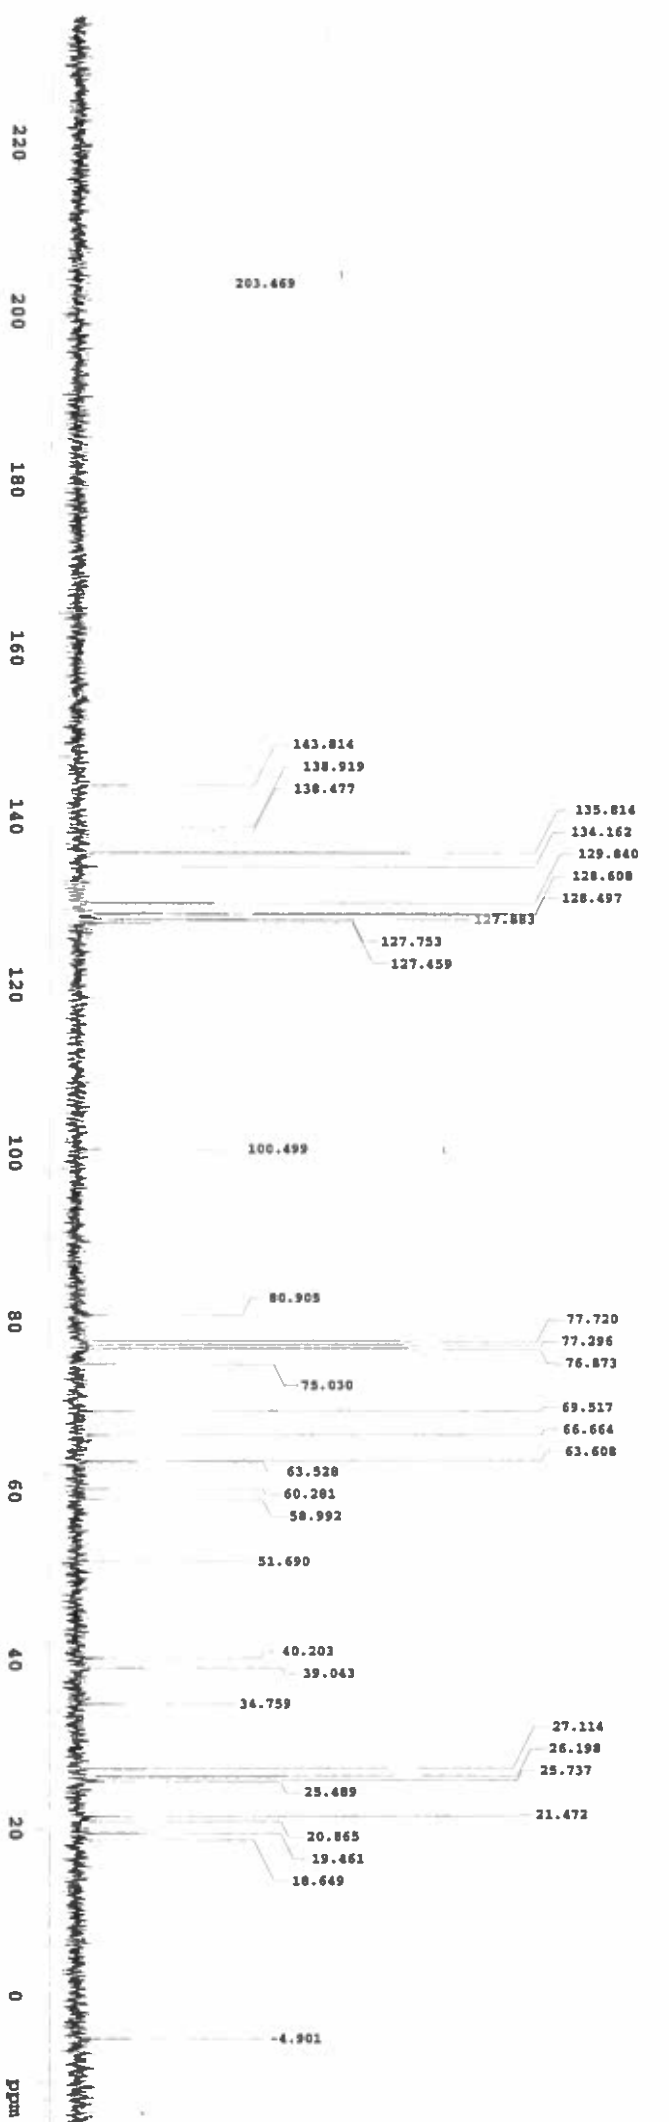

xldp2  
STANDARD IS OBSERVE

Automation directory: /data/mmdata/zan10  
File : 3101

Pulse Sequence: zgpg1  
Solvent: cdc13  
DATE: Jan 10 2005  
Sample: 831  
File: 3101  
F200A-300 "nucy"

Nucl: delay 1.000 sec  
Pulse 45.0 degree  
Acq. time 3.764 sec  
Width 4797.6 Hz  
16 repetitions  
OBSERVE: Hi, 299.848792 MHz  
DATA PROCESSING  
PR: size 65536  
Total time 1 min, 16 sec

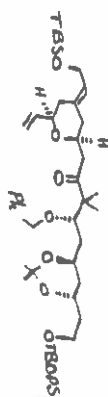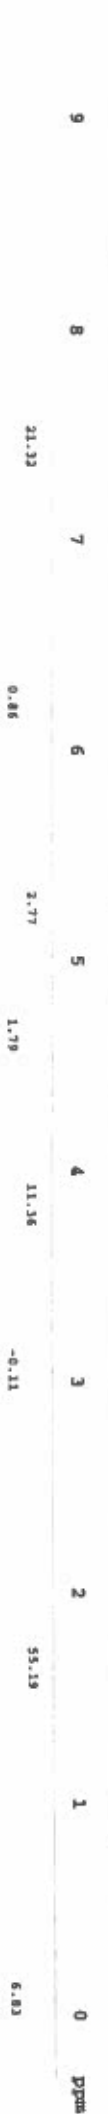

rd102  
STANDARD IN OBSERVE

Automation directory: /data/mwdata/Jan10  
File: 3102

Pulse sequence: s2pul

Solvent: cdcl3

Date: Jan 10 2005

Sample #31

File: 3102

INOVA-300 "pcty"

Relax. delay 1.000 sec

Pulse 45.0 degrees

Acq. time 1.815 sec

Width 18850.1 Hz

256 repetitions

OBSERVE C13, 75.2952883 MHz

DECOUPLE H1, 299.8477786 MHz

Power 37 dB

continuously on

WALTZ-16 modulated

DATA PROCESSING

Line broadening 1.0 Hz

FF else 131072

Total time 13 min, 2 sec

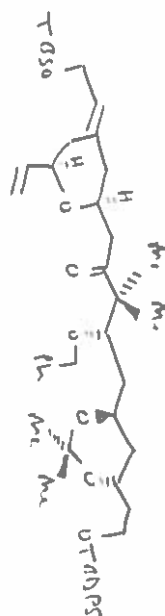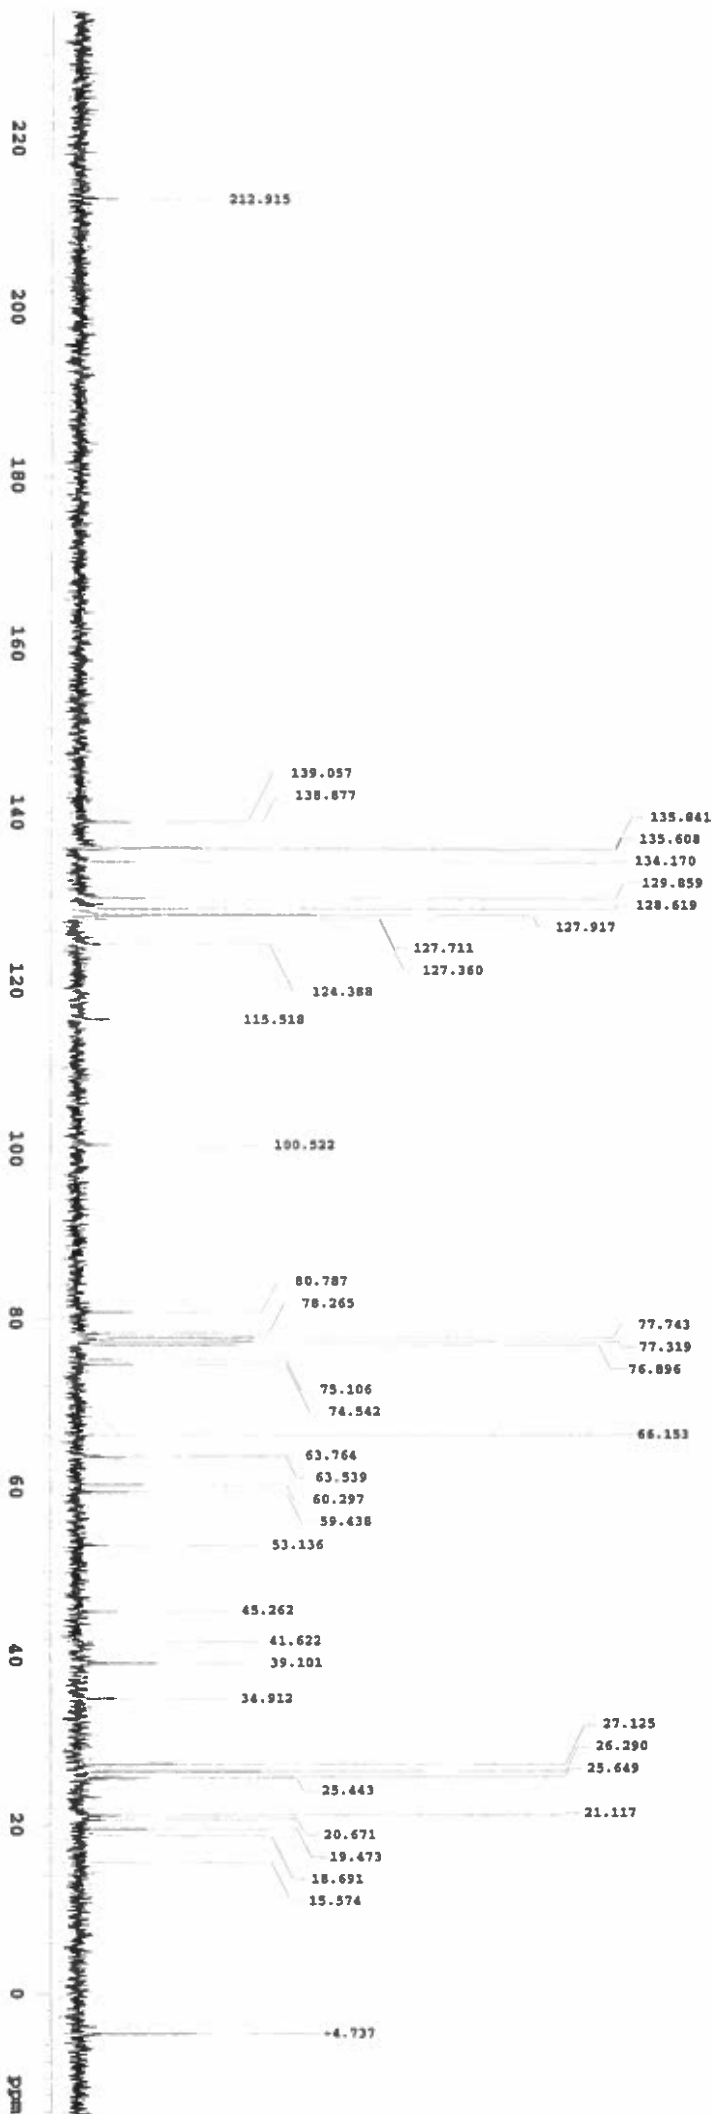

Automation directory: /data/mrdacm/Jan13  
File: 4901

Pulse sequence: zgpg1  
Solvent: CDCl3  
Date: Jan 13 2005  
Sample: 849  
File: 4901  
INOVA-300 \*xetxy\*

Relax. delay: 1.000 sec  
Pulse: 45.0 degrees  
Acq. time: 3.744 sec  
Width: 4797.6 Hz  
16 repetitions  
OBSERVE: H1, 299.8459063 MHz  
DATA PROCESSING  
FT size: 65536  
Total time: 1 min, 16 sec

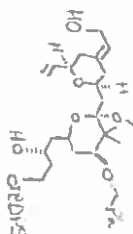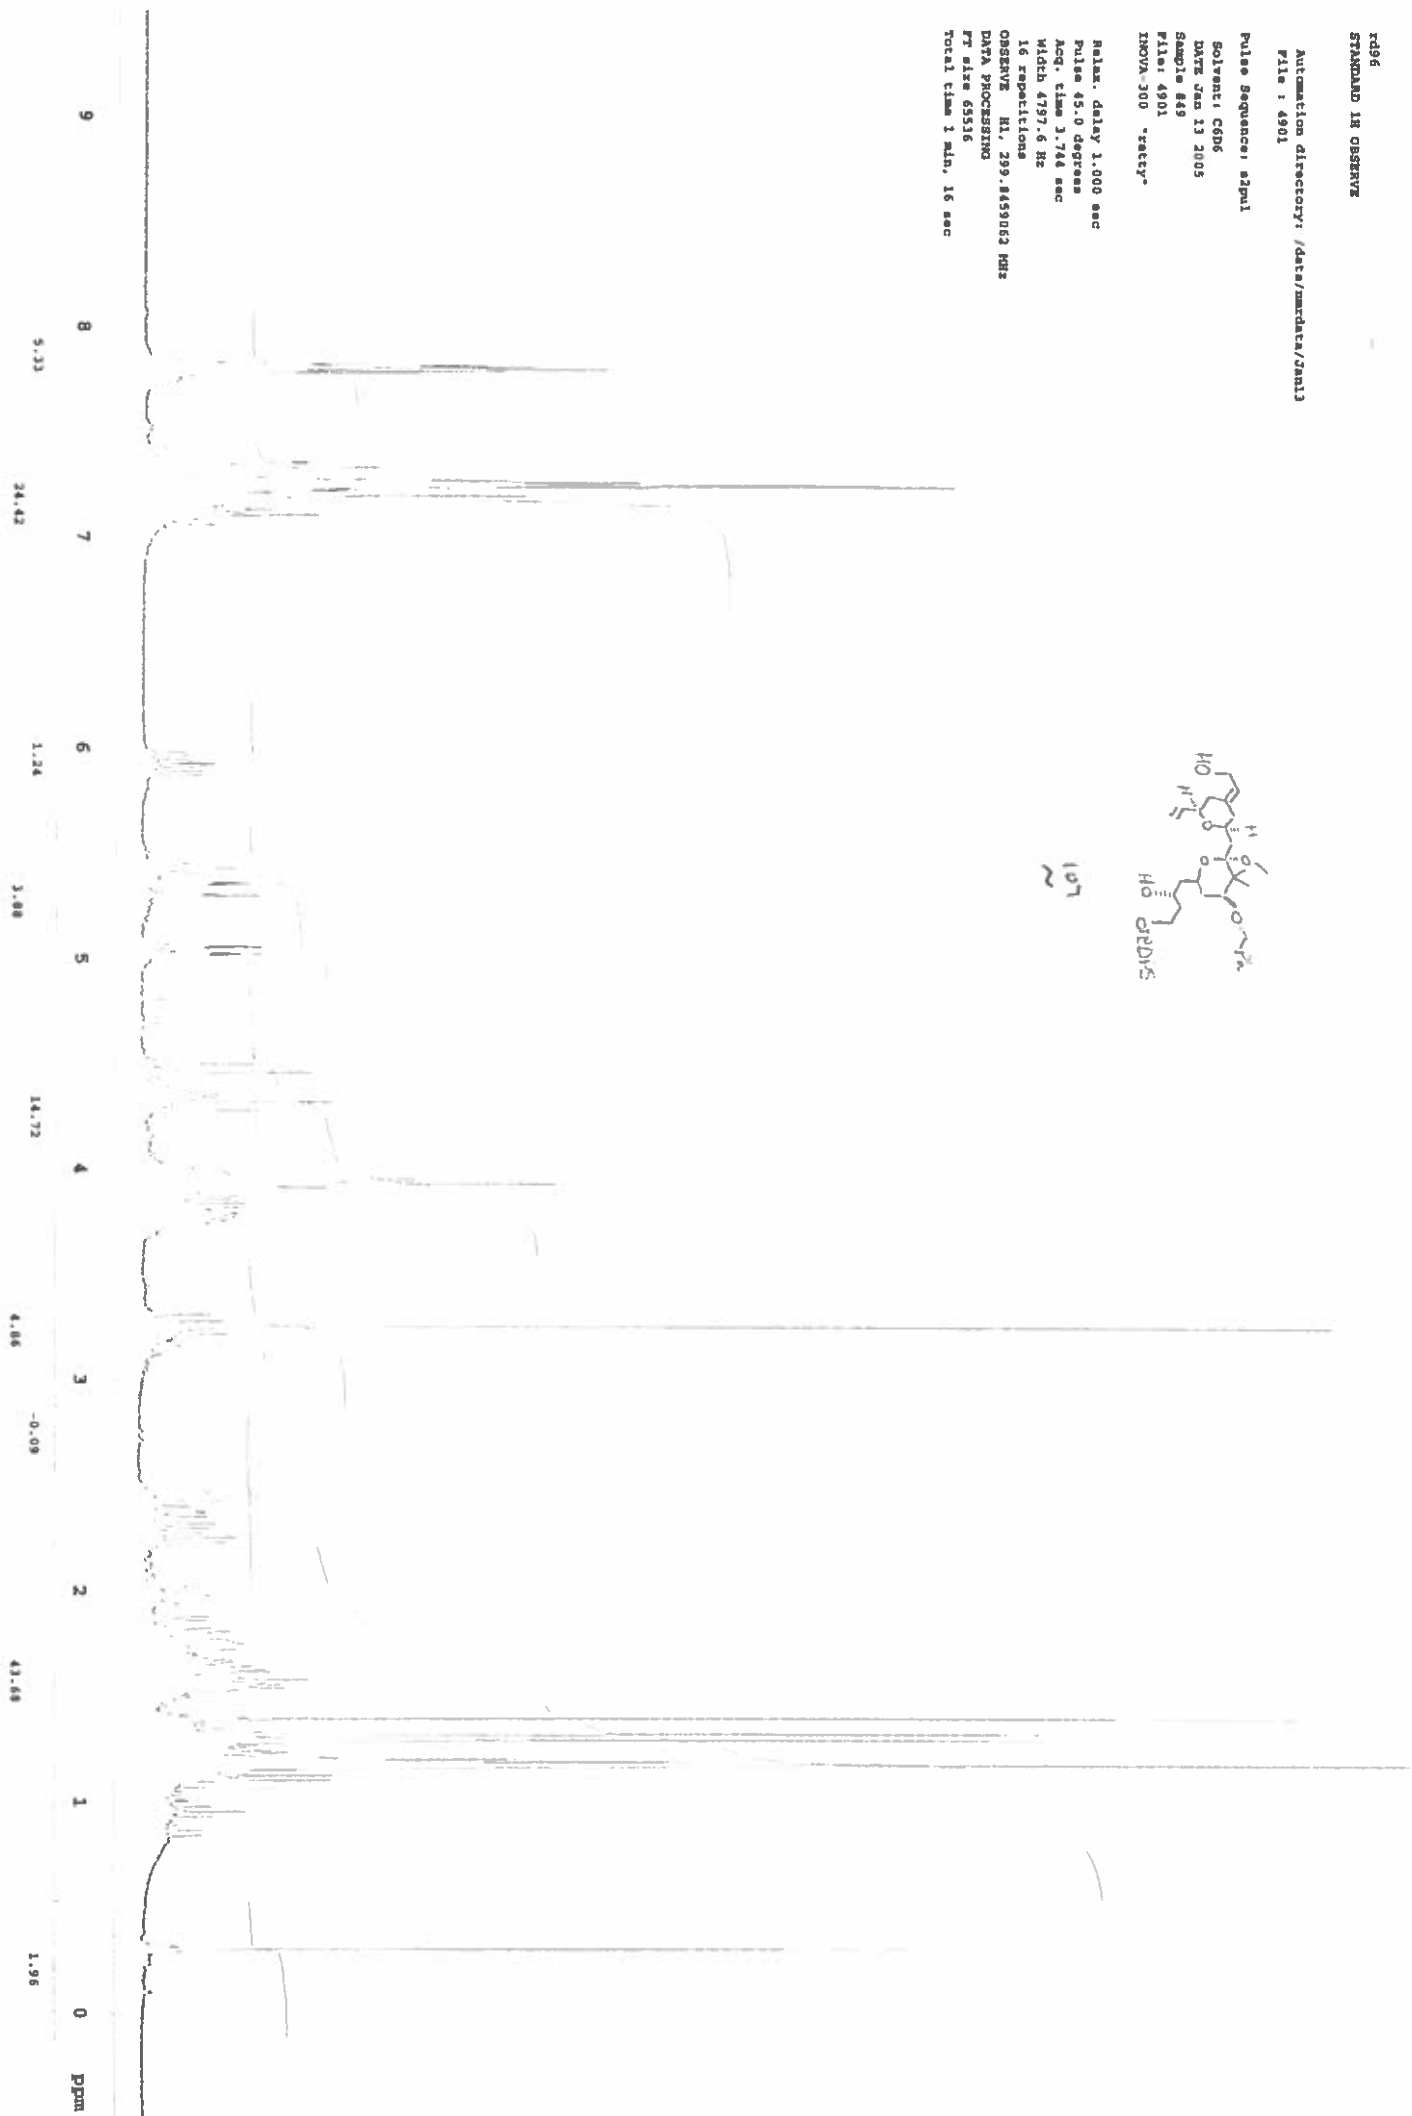

Automation directory: /data/standard/zan13  
File: 4902

Pulse Sequence: zgpg1  
Solvent: CDCl3  
Date Jan 13 2003  
Sample 849  
File: 4902  
INOVA-300 "zesty"

Relax. delay 1.000 sec  
Pulse 45.0 degrees  
Acq. time 1.815 sec  
Width 18850.1 Hz  
1024 repetitions  
OBSERVE C13, 75.3962931 MHz  
DECOUPLE H1, 299.8674036 MHz  
Power 17 dB  
continuously on  
MAGZ-16 modulated  
DATA PROCESSING  
Line broadening 1.0 Hz  
F2 size 131072  
Total time 48 min, 11 sec

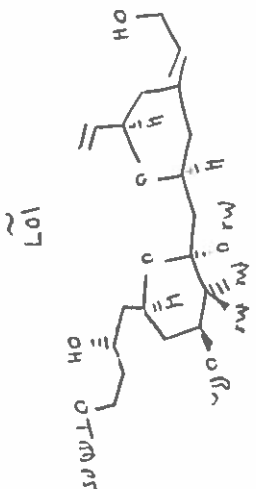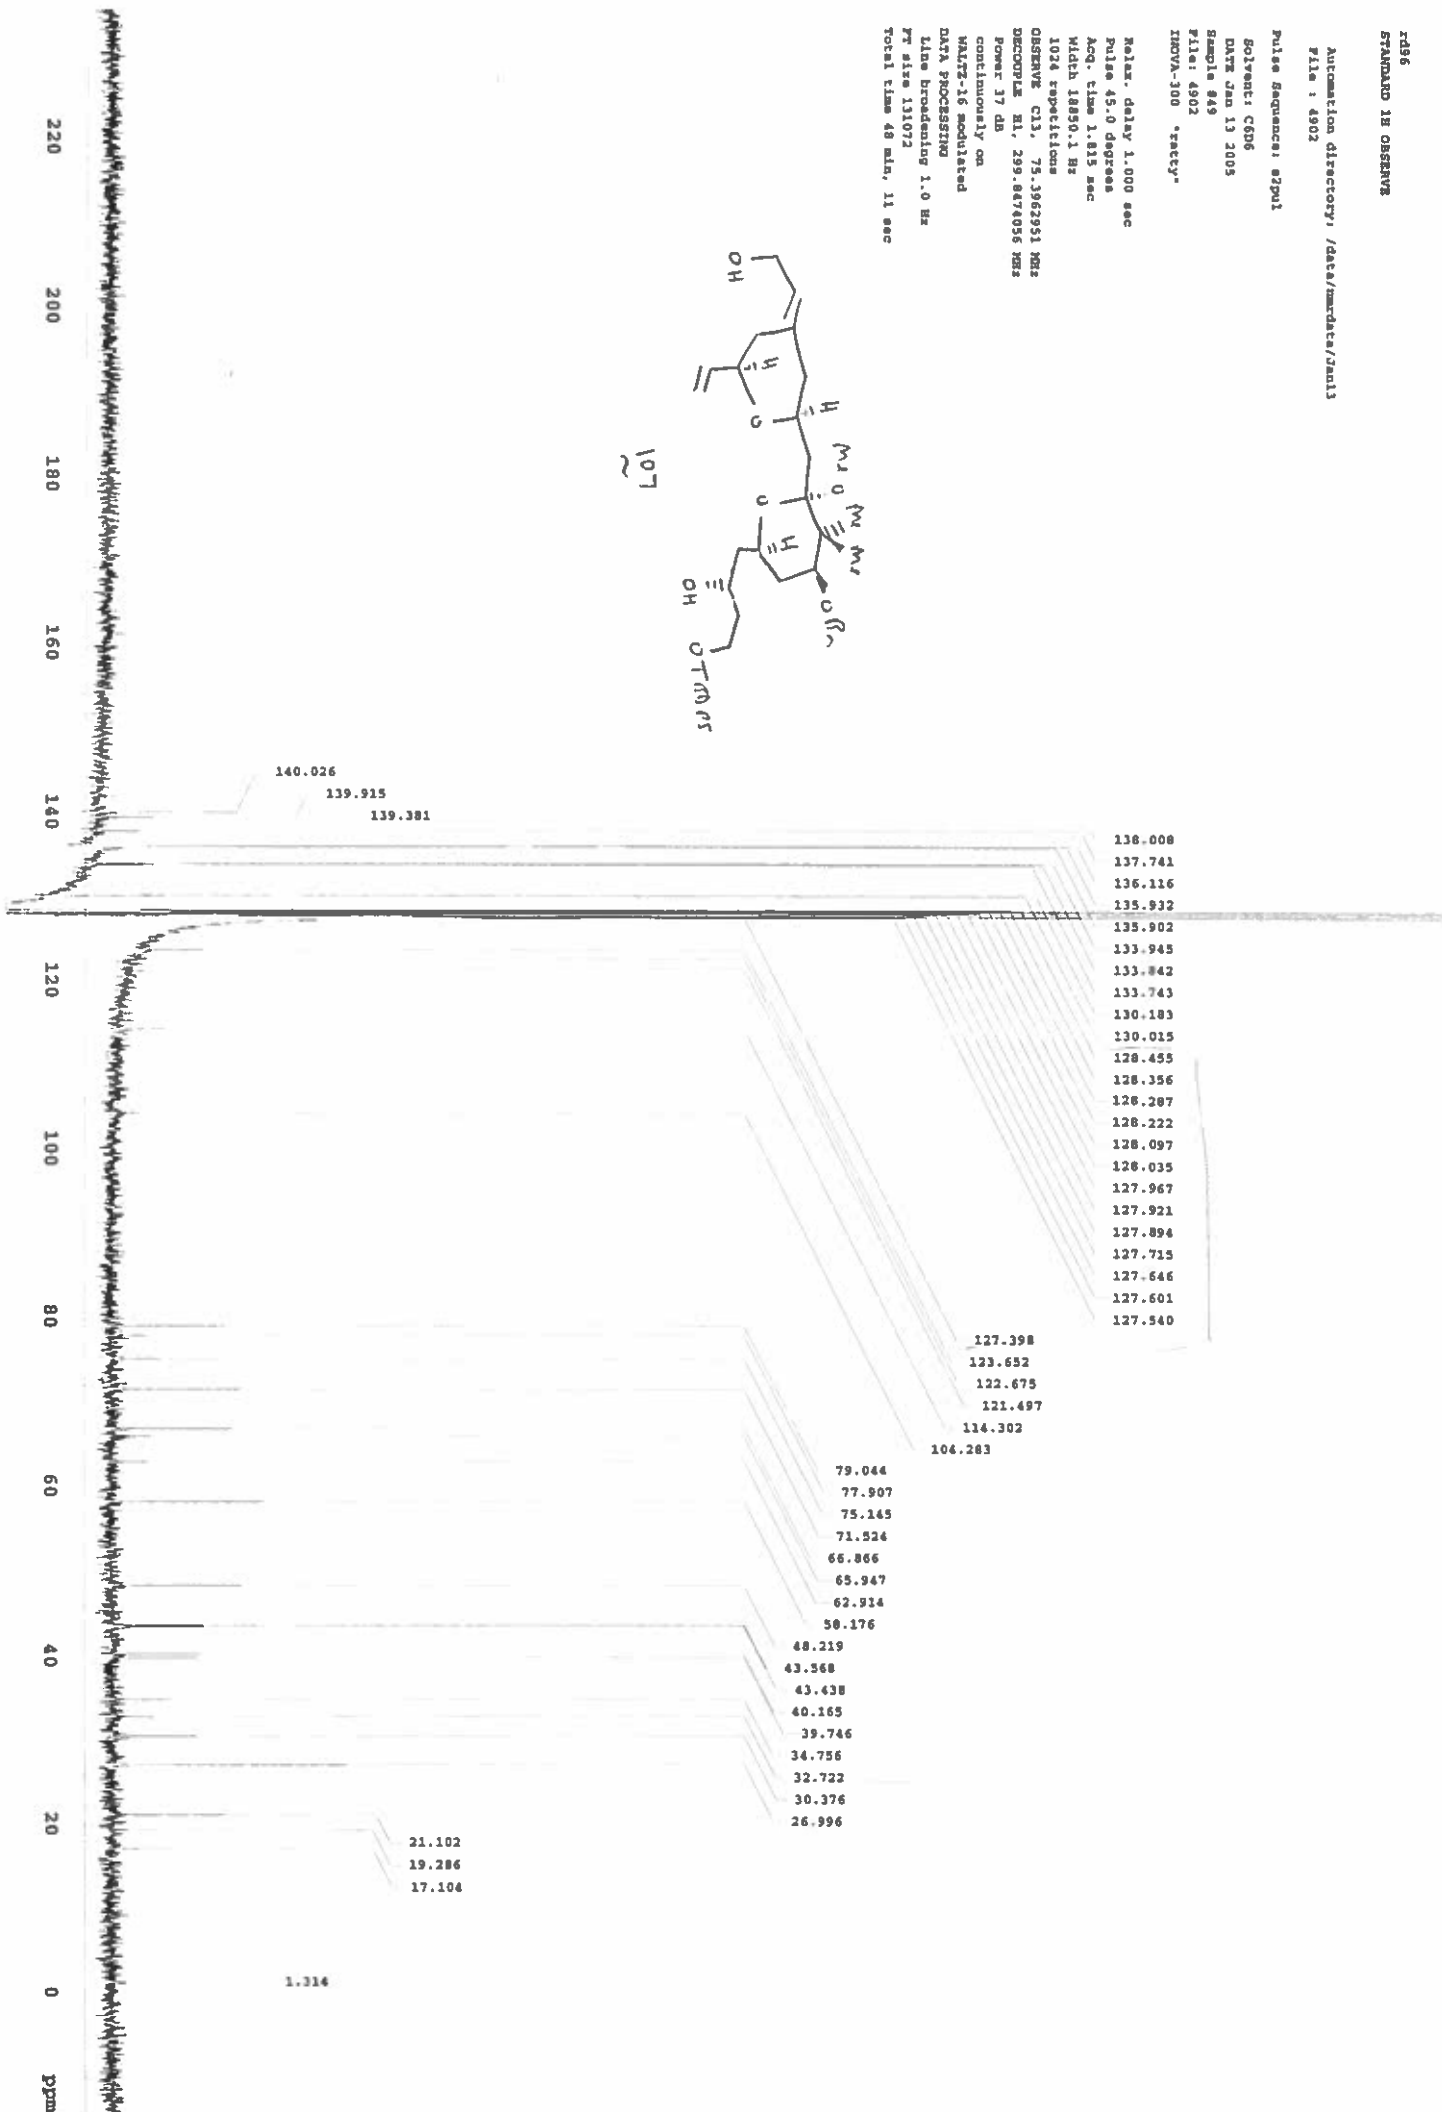

fid06p  
STANDARD IN OBSERVE

Automation directory: /data/mrdata/2826  
File: 0701

Pulse sequence: zgpg1  
Solvent: C6D6  
DATE: Jan 26 2005  
Sample #7  
File: 0701  
INOVA-300 "Pecety"

Relax. delay: 1.000 sec  
Pulse: 45.0 degrees  
Acq. time: 3.744 sec  
Width: 4791.6 Hz  
16 repetitions  
OBSERVE: H1, 299.8459063 MHz  
DATA PROCESSING  
F1: also 65536  
Total time: 1 min, 16 sec

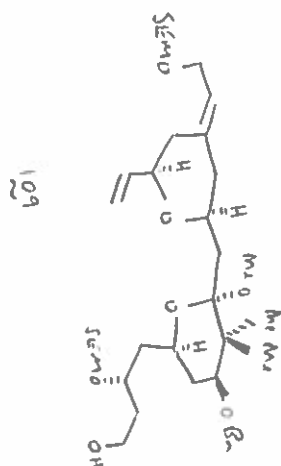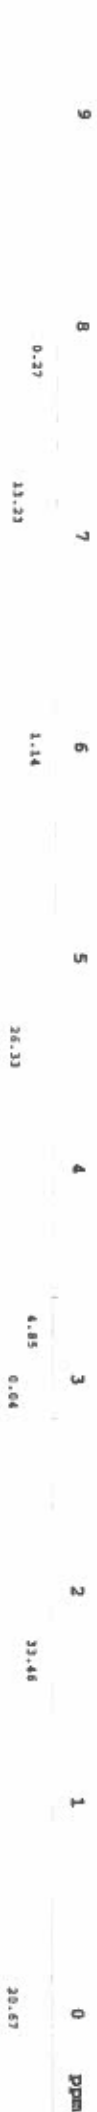



Automation directory: /data/mwdata/Jan26  
 File: 0702

Pulse Sequence: e3put  
 Solvent: C6D6  
 Date: Jan 26 2005  
 Sample #: 7  
 File: 0702  
 INOVA-300 "ratty"

Relax. delay 1.000 sec  
 Pulse 45.0 degrees  
 Acq. time 1.815 sec  
 Width 18850.1 Hz  
 256 repetitions  
 OBSERVE C13, 75.362951 MHz  
 DECOUPLE H1, 299.8474056 MHz  
 Power 37 dB  
 continuously on  
 WALTZ-16 modulated  
 DATA PROCESSING  
 Line broadening 1.0 Hz  
 FT size 131072  
 Total time 12 min. 2 sec

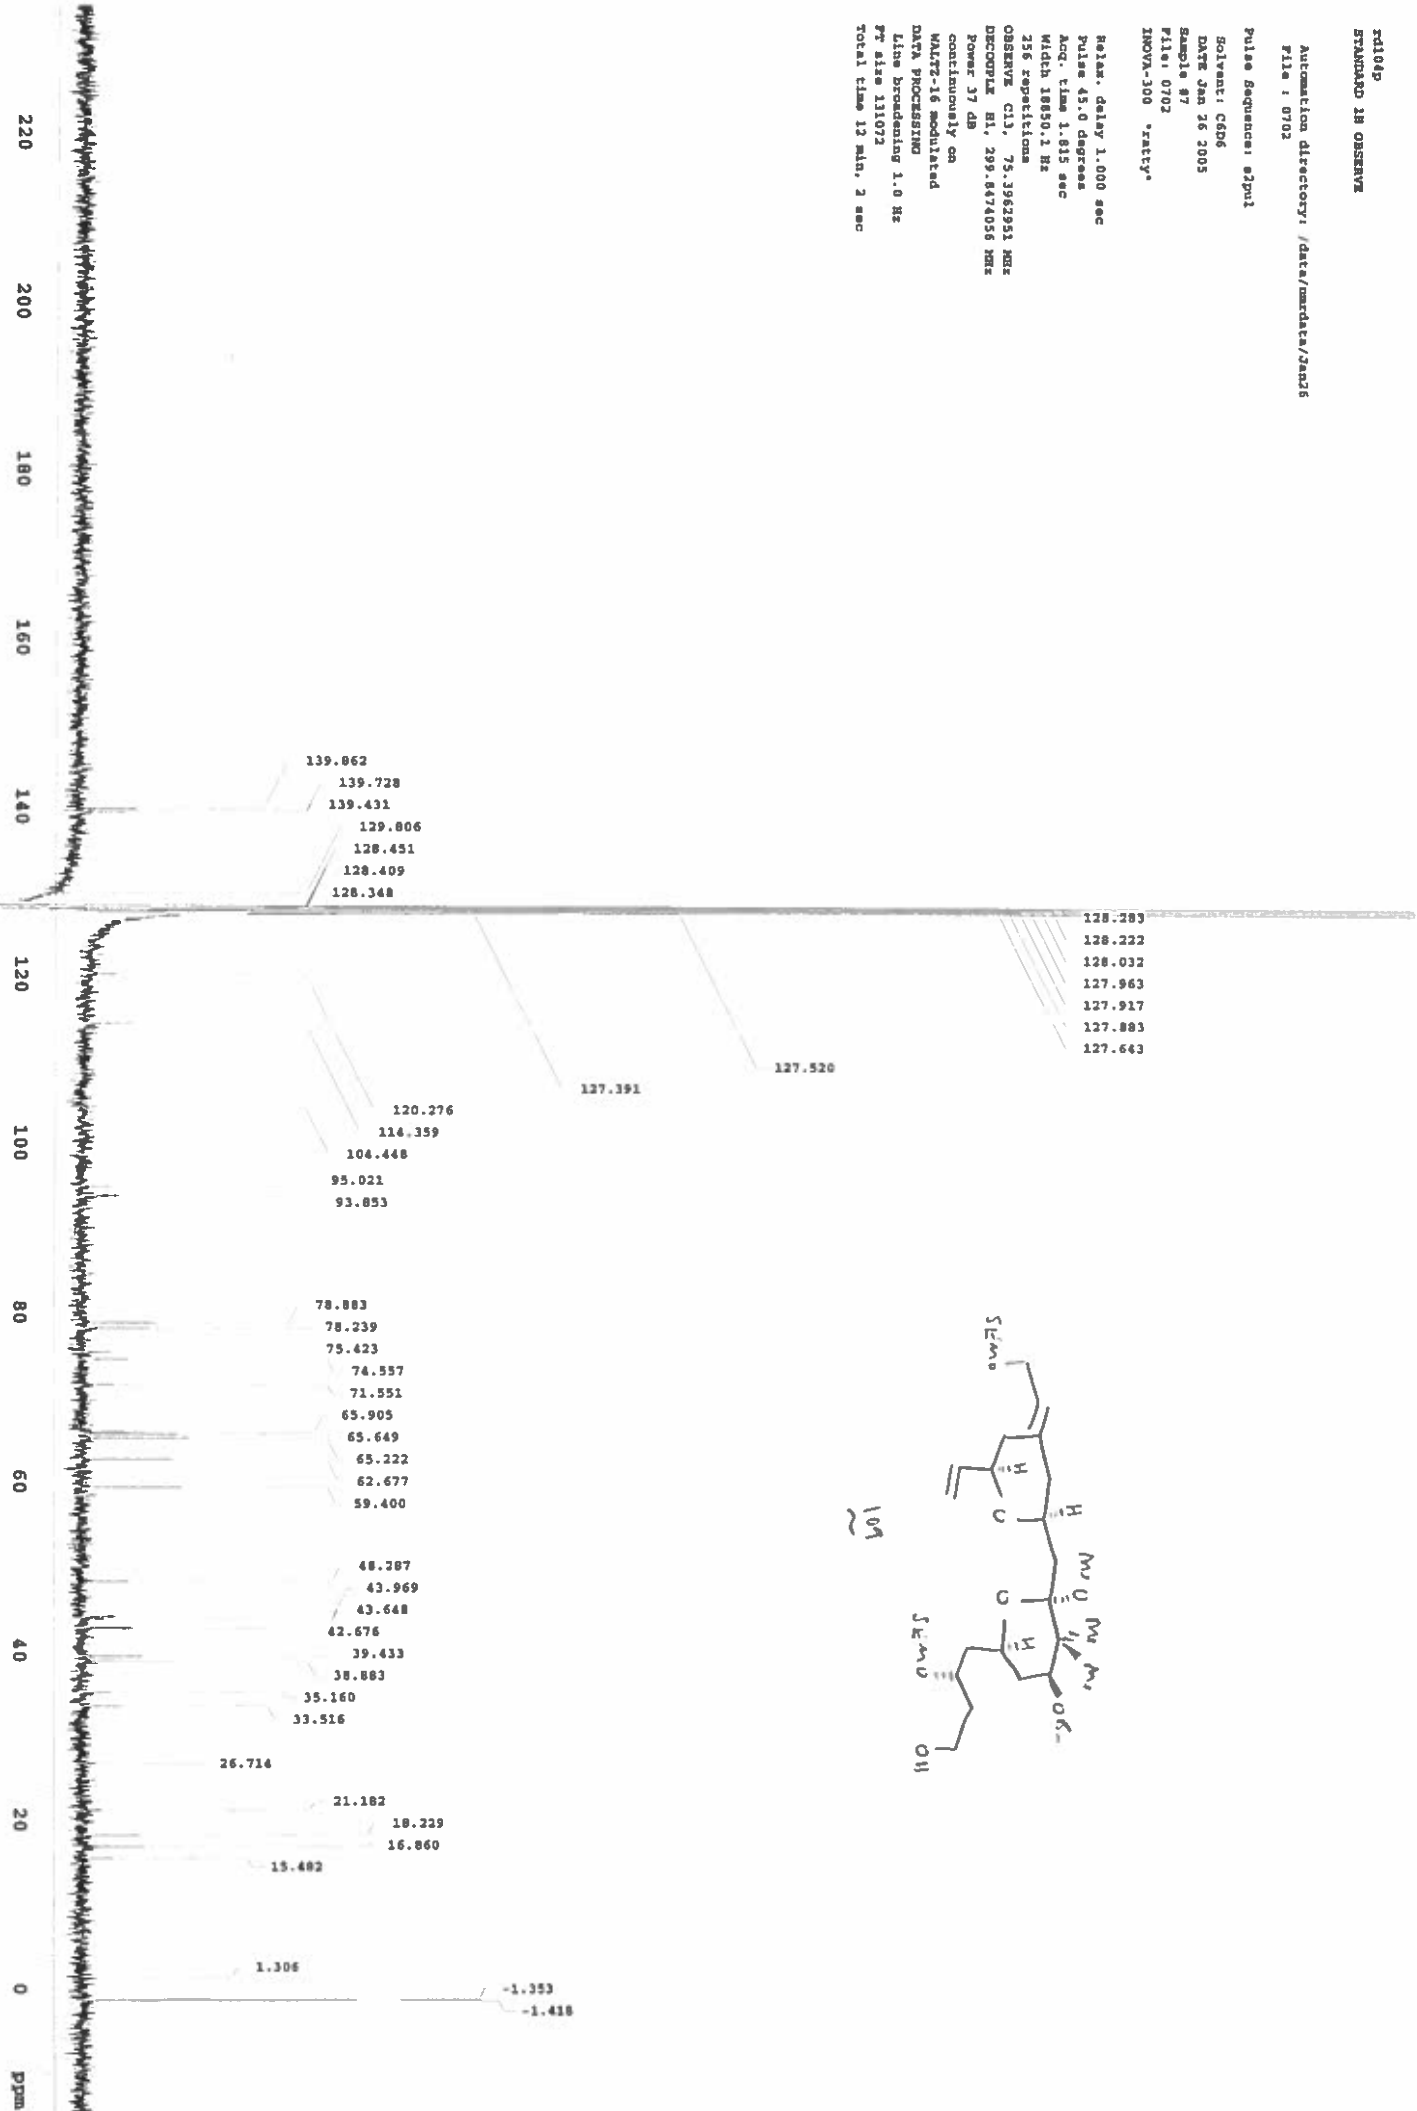

139.862  
 139.728  
 139.431  
 129.806  
 128.451  
 128.409  
 128.348

128.283  
 128.222  
 128.032  
 127.963  
 127.917  
 127.883  
 127.643

127.520  
 127.391

120.276  
 114.359  
 104.448  
 95.021  
 93.853

78.883  
 78.239  
 75.423  
 74.557  
 71.551  
 65.905  
 65.649  
 65.222  
 62.677  
 59.400

48.287  
 43.969  
 43.648  
 42.676  
 39.433  
 38.883  
 35.160  
 33.516

26.714  
 21.182  
 18.229  
 16.860  
 15.482

1.306  
 -1.353  
 -1.418

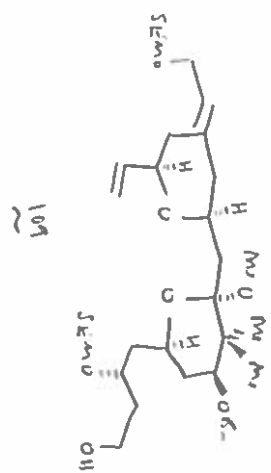

Supplement: c6ob01804a1.pdf [file c6ob01804a1.pdf]
